# Supplementary material for: Transcriptome Analysis in Vulvar Squamous Cell Cancer
Source: MDPI journal article supplement (doi:10.3390/cancers13246372), 2021-12-19
Supplement: s1 [file s1]

**Supplementary Table S3. Individual patient characteristics of TP53mutated, HPV positive and 'double' negative vulvar cancer.**

| <b>Tumor Samples</b> | <b>Clinical Parameters</b>                                                                               | <b>TP53 Mutation</b>                                        | <b>HPV Status</b> | <b>Time to Recurrence (Months)</b>      | <b>Time to Death (Months)</b> |
|----------------------|----------------------------------------------------------------------------------------------------------|-------------------------------------------------------------|-------------------|-----------------------------------------|-------------------------------|
| VSCC2                | 67yrs, vulvectomy, bilateral if-LNE, G1, pT2, pN0, G1, R0                                                | TP53 missense variant (COSMIC)                              | negative          | No recurrence/death after 116 months FU |                               |
| VSCC7                | 62yrs, vulvectomy, bilateral if-LNE, pT3, pN0, G2, R0, adj. radiation Vulva                              | TP53 missense variant (COSMIC)                              | negative          | No recurrence/death after 97 months FU  |                               |
| VSCC10               | 67yrs, vulvectomy, no if LNE, pelvic LNE, pT4, R1, cN0, adj. radiation to vulva and groins, G3, FIGO IVa | TP53 stop gained variant (COSMIC)                           | negative          | Progressive disease                     | Death after 9 months          |
| VSCC11               | 63yrs, radical local excision, unilateral if-LNE, pelvic LNE, pT2, pN0, G2, radiation vulva, R1          | TP53wt                                                      | positive          | n.a.                                    | Death after 26 months         |
| VSCC12               | 74yrs, radical local excision, no LNE, pT1b, pNx, R0, G2                                                 | TP53 missense variant (COSMIC)                              | negative          | No recurrence/death after 0.5 months FU |                               |
| VSCC13               | 84yrs, radical local excision, no LNE, pT2, pNx, G3, R1, local recurrence, radiation                     | TP53 missense variant (COSMIC)                              | negative          | Recurrence after 4 months               | Death after 15 months         |
| VSCC15               | 38yrs vulvectomy, bilateral if LNE, adj. radiation vulva, pT3, pN0, G3, R0                               | TP53wt                                                      | negative          | No recurrence/death after 136 months FU |                               |
| VSCC17               | 81yrs, vulvectomy, bilateral if-LNE, radiation vulva, pT2, pN0, G3, R0                                   | TP53wt                                                      | positive          | n.a.                                    | Death after 11 months         |
| VSCC20               | 84yrs, vulvectomy, bilateral if-LNE, pT2, pN0, G3, R0                                                    | TP53 missense variant and stop gained variant (both COSMIC) | negative          | n.a.                                    | Death after 21 months         |
| VSCC24               | 54 yrs, radical local excision, bilateral if-LNE, FIGO IVa, pT2, pN2, G2, R0,                            | TP53wt                                                      | negative          | Progressive disease                     | Death after 15 months         |
| VSCC36               | 49yrs, vulvectomy, bilateral if-LNE, pT2, pN0, G3, R0                                                    | TP53wt                                                      | positive          | No recurrence/death after 54 months FU  |                               |

|        |                                                                                                                                                                           |                                                             |          |                                          |                         |
|--------|---------------------------------------------------------------------------------------------------------------------------------------------------------------------------|-------------------------------------------------------------|----------|------------------------------------------|-------------------------|
| VSCC39 | 76yrs, vulvectomy, bilateral if-LNE, pT2, pN0, G2, R0,                                                                                                                    | TP53wt                                                      | positive | n.a.                                     | Death after 18.5 months |
| VSCC42 | 42yrs, radical local excision, snl LNE, pT2, pN0, G2, R0,                                                                                                                 | TP53 splice donor variant (COSMIC)                          | negative | No recurrence/death after 87 months FU   |                         |
| VSCC44 | 38yrs, radical local excision, unilateral if-LNE, pT2, pN0, G2, R0,                                                                                                       | TP53 missense variant (COSMIC)                              | negative | No recurrence/death after 30 months FU   |                         |
| VSCC45 | 46yrs, vulvectomy, pT2, cN0, G3, R0                                                                                                                                       | TP53 stop gained variant (COSMIC)                           | negative | No recurrence/death after 2 months FU    |                         |
| VSCC46 | 68yrs, vulvetomy, bilateral if-LNE, pT2, pN2, G2, R0, recurrence inguinal and vulva, radiation, distant metastasis in course of disease                                   | TP53 missense variant (COSMIC)                              | negative | Recurrence after 5 months                | Death after 11 months   |
| VSCC47 | 94yrs, partial vulvectomy, pT2, pNx, G3, R0,                                                                                                                              | TP53wt                                                      | negative | No recurrence/death after 15 months FU   |                         |
| VSCC48 | 40yrs, radical local excision, bilateral if-LNE, pT1b, pN1, G1, Rx, chemoradiation vulva and groins, recurrence vulva and groins, distant metastasis in course of disease | TP53wt                                                      | positive | Recurrence after 15 months               | Death after 37 months   |
| VSCC50 | 44yrs, radical local excision, snl only, pT1b, pN0, R0, G3                                                                                                                | TP53 stop gained variant (COSMIC)                           | negative | No recurrence/death after 28.5 months FU |                         |
| VSCC51 | 68yrs, radical local excision, snl only, pT2, pN0, Gx, R0                                                                                                                 | TP53 missense variant (COSMIC)                              | negative |                                          | Death after 12 months   |
| VSCC52 | 76yrs, vulvectomy, bilateral if-LNE, radiation groins and pelvis, pTx, pN1, G3, R0                                                                                        | TP53 missense variant (COSMIC)                              | negative | No recurrence/death after 72.3 months FU |                         |
| VSCC53 | 45yrs, no surgical primary therapy, primary radiation, unilateral if-LNE, cT1b, pN0, Gx, recurrence vulva and groins, distant metastasis in course of disease             | TP53 missense variant and stop gained variant (both COSMIC) | negative | Recurrence after 11 months               | Death after 36 months   |
| VSCC55 | No clinical information                                                                                                                                                   | TP53 missense variant (COSMIC)                              | negative | n.a.                                     | n.a.                    |
| VSCC56 | 53yrs, vulvectomy, bilateral if-LNE, radiation to vulva, groins and pelvis, pT1b, pN0, G1, R0,                                                                            | TP53wt                                                      | negative | No recurrence/death after 67.2 months FU |                         |

Yrs: years; FU: follow-up, if-LNE: inguino-femoral Lymphadenectomy, snl: sentinel; wt: wildtype, FD: first diagnosis, n.a.: not applicable; TNM classification 6<sup>th</sup> edition was used [24, 25].
