# Supplementary material for: Transcriptome Analysis in Vulvar Squamous Cell Cancer
Source: Cancers (Basel). 2021 Dec 19;13(24):6372. doi: 10.3390/cancers13246372 (PMC8699756; doi:10.3390/cancers13246372)
Supplement: Supplementary file 1 [file cancers-13-06372-s001.zip]

Archive with 4 entries (4 files):
- S1_somatic variants WES vulvar cancer.xlsx
- S2_differential expression analysis.xlsx
- S3 invividual patient characteristics.pdf
- S4 other_group_final.xlsx
