# Supplementary material for: Transcriptome Analysis in Vulvar Squamous Cell Cancer
Source: Cancers (Basel). 2021 Dec 19;13(24):6372. doi: 10.3390/cancers13246372 (PMC8699756; doi:10.3390/cancers13246372)
Supplement: Supplementary file 1 [file cancers-13-06372-s001.zip › S2_differential expression analysis.xlsx]

## Sheet: DE Analysis
geneSymbol	TP53mut vs. HPV+						TP53mut (Normalized Counts)															HPV+ (Normalized Counts)					OTHER (Normalized Counts)
	log2FoldChange	lfcSE	stat	pvalue	padj	|log2FC|>=1 AND FDR <= 0.1	VSCC10	VSCC12	VSCC13	VSCC20	VSCC2	VSCC7	VSCC42	VSCC44	VSCC45	VSCC46	VSCC50	VSCC51	VSCC52	VSCC53	VSCC55	VSCC11	VSCC17	VSCC36	VSCC39	VSCC48	VSCC15	VSCC24	VSCC47	VSCC56
ABL1	-0.217831	0.194841	-1.11799	0.263571	0.464076	false	399.827	317.184	634.41	364.593	470.434	317.781	219.466	371.802	516.101	570.479	392.967	477.503	501.561	582.772	369.87	674.187	903.414	354.652	346.612	454.382	278.957	490.016	513.725	504.12
ACVR1B	-0.0229814	0.254042	-0.0904629	0.927919	0.970891	false	183.704	148.854	244.572	184.044	252.712	133.631	133.459	127.232	161.963	301.925	199.264	214.276	174.563	264.897	101.249	132.147	201.464	207.5	200.265	267.065	71.4401	152.074	280.361	102.262
ACVR1C	-0.5286	0.333955	-1.58285	0.113456	0.288975	false	35.5058	25.0408	70.5811	51.2527	86.5054	66.8155	32.6233	36.0492	76.3661	31.7816	30.5847	43.4093	80.3154	43.5187	58.8898	118.695	30.9334	85.1496	34.2333	111.277	68.0382	45.0589	76.1674	36.7504
ACVR2A	-0.283684	0.356306	-0.79618	0.425928	0.620858	false	267.066	186.415	289.711	398.373	287.703	374.004	133.459	336.459	109.094	204.197	177.021	203.193	171.285	223.27	303.748	410.685	263.331	202.54	296.118	403.38	95.2535	214.03	874.304	186.149
AKT1	0.507991	0.202792	2.50499	0.0122455	0.0675839	false	4801.01	4000.96	3294.33	1645.91	2920.77	3276.41	3885.13	2772.96	3067.23	2696.67	4380.1	2226.81	2750.39	2596.93	2620.08	1869.84	1744.96	2413.12	2515.29	1709.03	7732.54	2602.15	1933.35	1613.82
AKT2	-0.485311	0.220734	-2.19863	0.0279045	0.117982	false	2434.47	1158.83	1800.64	1419.93	1018.63	1161.94	2081.96	1282.22	1448.44	838.239	2120.54	1209	804.793	1452.2	1297.64	2993.49	1725.93	1526.08	1898.23	1224.98	2636.48	1446.58	1351.57	1198.38
AKT3	1.06142	0.416593	2.54787	0.0108384	0.0621916	true	1074.44	356.136	1235.17	1361.69	660.94	206.15	151.253	424.815	279.45	266.965	456.917	265.998	351.585	947.951	698.413	349.755	226.052	264.542	153.194	326.413	489.875	331.371	627.976	349.129
ALK	0.0475973	0.222438	0.21398	0.830563	0.903003	false	21.6123	29.2143	17.2349	30.2857	19.4394	22.0002	26.6918	15.5506	21.8189	22.2471	15.7558	24.0137	18.8495	17.0291	29.9615	22.9477	13.4838	14.0538	18.8283	32.4558	37.421	15.0196	27.5499	24.7666
ALKBH2	-0.443171	0.299069	-1.48183	0.138385	0.322749	false	37.0496	75.1224	73.0433	80.3735	59.2902	162.15	86.0068	115.923	46.9945	50.8505	74.1447	35.0969	104.082	57.7096	44.4257	140.06	90.4207	86.8029	83.0157	114.059	85.0477	144.564	74.5468	127.029
ALKBH3	0.666367	0.203708	3.27119	0.00107098	0.0126937	false	112.692	237.888	334.029	228.307	306.171	405.782	100.836	314.547	256.792	390.119	341.993	377.754	336.833	348.15	378.135	180.416	167.358	205.847	204.544	255.937	64.6363	264.721	230.933	386.678
AMER1	0.0991511	0.320683	0.309187	0.757179	0.867677	false	180.617	102.946	283.966	468.263	108.861	120.594	133.459	163.989	86.4364	144.606	125.119	191.186	111.458	199.618	144.642	117.904	94.3865	138.058	219.093	203.081	125.871	109.831	196.901	124.632
ANGPT1	0.363427	0.422237	0.860718	0.389393	0.585304	false	37.0496	48.6905	24.6213	46.5933	138.992	41.556	14.8288	118.75	39.4418	104.879	94.5345	60.9578	116.375	29.3278	136.376	77.5474	58.6942	52.0818	11.9816	119.623	34.0191	53.5075	90.7526	131.023
APC	-0.665637	0.215394	-3.09033	0.00199936	0.0182979	false	214.579	153.027	201.895	329.648	249.796	171.928	335.13	178.125	141.823	149.373	179.801	194.88	202.428	172.183	233.493	313.355	253.019	179.393	391.115	456.236	166.694	149.258	217.968	170.969
APH1B	0.365656	0.341463	1.07085	0.284237	0.486974	false	61.7493	33.3877	40.2148	36.1098	75.8137	68.4452	62.2808	37.4629	51.1905	40.5215	36.1456	34.1733	36.8795	88.9296	66.1219	27.6955	30.1402	37.2013	58.1966	44.5109	40.8229	26.2844	146.663	34.3536
AR	0.457847	0.477228	0.95939	0.337363	0.534897	false	52.4869	37.5612	34.4699	40.7692	69.9819	47.2598	47.452	65.0299	44.477	65.9467	115.851	62.805	46.7141	60.5478	247.957	68.0518	35.6924	41.3347	16.2608	133.533	23.8134	60.0786	255.242	58.3213
ARID1A	-0.453283	0.1975	-2.2951	0.0217276	0.0975716	false	415.264	548.115	486.682	412.351	643.445	826.231	323.267	581.735	591.628	467.983	859.152	568.939	544.997	517.494	698.413	725.622	859.79	716.744	1046.68	759.467	122.469	695.597	635.268	502.522
ARID1B	-0.615912	0.190325	-3.2361	0.00121176	0.0136891	false	484.732	667.755	739.461	758.307	899.073	796.897	667.294	840.441	780.445	802.484	848.03	634.515	440.096	1047.29	832.723	1281.11	971.626	955.659	1472.89	1252.8	360.602	712.494	1128.74	632.746
ARID2	-0.297283	0.222117	-1.3384	0.180765	0.383264	false	523.325	538.377	689.397	661.626	456.826	380.523	299.541	707.554	496.799	440.969	646.913	405.462	520.411	682.109	518.644	568.945	639.29	751.466	803.626	634.28	153.086	416.795	742.227	344.335
ARNT2	0.628072	0.403446	1.55677	0.119526	0.295949	false	169.811	18.085	20.5178	25.6263	65.122	141.779	62.2808	45.2382	31.05	54.0286	50.0477	59.1106	54.9095	41.6266	88.8513	37.1911	46.0035	37.2013	23.9633	44.5109	37.421	43.1815	71.3056	47.9353
ASXL1	-0.138201	0.18247	-0.757389	0.448817	0.643838	false	1319.89	920.945	1235.17	1327.91	733.838	1148.9	851.17	651.006	746.878	689.66	683.985	665.918	626.132	1287.59	849.253	887.838	923.243	954.832	1075.78	741.848	2963.06	763.185	763.294	1090.53
ATM	0.518208	0.292489	1.77172	0.0764413	0.22989	false	55.5744	95.9898	113.258	135.121	109.833	105.112	56.3493	135.715	69.6526	80.2484	86.1933	72.041	131.947	79.469	219.029	72.7996	71.3848	71.0957	52.2057	119.623	51.0286	84.4855	196.09	89.4793
ATR	-0.141166	0.200753	-0.703182	0.481942	0.673974	false	870.665	940.421	648.362	1090.28	649.276	622.525	510.109	472.174	559.739	796.128	455.99	549.544	817.086	658.457	618.86	386.946	974.006	596.047	857.543	793.777	625.951	470.302	445.66	421.032
ATRX	-0.0528378	0.229972	-0.229757	0.81828	0.897749	false	1341.5	685.84	1044.77	1056.5	688.155	1003.05	557.561	641.11	690.652	545.848	760.91	757.354	1035.9	991.47	756.27	655.196	433.861	713.438	1610.68	803.05	1524.06	579.195	961.816	593.599
AXIN1	-0.0334967	0.2519	-0.132976	0.894212	0.950758	false	561.919	639.932	416.921	405.362	404.34	1115.49	708.814	414.212	359.173	464.011	582.036	253.067	354.863	579.934	434.958	344.215	306.161	616.714	789.933	427.49	969.544	631.764	328.168	353.123
AXIN2	0.694447	0.417506	1.66332	0.0962484	0.271826	false	364.321	121.031	160.039	175.89	189.534	117.335	32.6233	125.112	99.8634	150.962	187.215	148.7	80.3154	278.141	199.399	79.9213	90.4207	172.779	43.6474	127.969	54.4306	97.6276	388.129	136.616
B2M	-0.381112	0.395244	-0.964243	0.334924	0.53337	false	61900.6	129309	40734.3	42342.9	155057	49066.2	82317.4	113234	129437	154825	32169.5	28898.6	80935	36856.6	129221	114549	86780.9	104628	125954	150028	28838	161420	58823.1	78446.1
BAD	0.262013	0.335737	0.780413	0.435148	0.630485	false	1117.66	2146.55	860.105	433.318	495.705	805.86	821.513	1184.68	657.084	810.43	1033.39	501.516	844.131	932.814	473.185	646.492	427.516	1199.53	570.84	902.272	187.105	848.61	486.985	543.267
BAIAP3	0.771216	0.575543	1.33998	0.180251	0.383264	false	311.834	20.8673	45.1391	16.3077	101.085	368.3	139.39	31.1013	42.7986	58.0013	51.9013	47.1037	16.3909	34.0581	54.7572	58.5562	45.2104	49.6017	18.8283	36.1651	71.4401	31.9167	13.775	41.5439
BAMBI	-0.421931	0.563812	-0.748353	0.454247	0.647399	false	30.8746	89.034	49.2427	123.472	42.7667	26.8892	50.4178	148.438	56.2256	48.4669	35.2187	33.2497	466.321	38.7884	43.3925	211.277	269.676	26.4542	38.5124	119.623	51.0286	49.7526	142.611	120.637
BAP1	0.09762	0.21162	0.461298	0.644585	0.805608	false	1096.05	872.255	604.864	959.823	357.685	880.824	1055.81	571.132	526.171	447.325	630.23	434.093	320.442	526.009	451.489	542.832	339.474	703.517	909.749	232.755	1541.07	528.504	688.748	365.107
BAX	-0.200957	0.193158	-1.04038	0.298166	0.500732	false	924.696	773.483	1143.25	1311.6	852.418	1057.64	768.129	1253.95	1156.4	846.184	1191.88	870.034	617.117	858.076	986.663	678.935	1576.81	1358.26	1064.65	911.545	1200.87	993.174	774.638	1265.49
BCL2	0.74402	0.492655	1.51022	0.130986	0.311857	false	63.293	62.602	86.1747	237.626	43.7387	32.5929	29.6575	98.9586	52.8689	50.8505	77.852	34.1733	55.729	51.0872	216.963	44.3128	20.6223	33.0678	57.3407	77.894	61.2344	62.8947	318.444	62.3159
BCL2A1	0.810411	0.553664	1.46372	0.14327	0.333068	false	50.9432	141.898	45.1391	51.2527	58.3182	52.1487	47.452	641.11	88.1148	220.882	178.874	88.6659	86.8717	156.1	271.72	41.9389	54.7283	53.7352	79.5924	200.299	207.517	68.5271	323.306	171.768
BCL2L1	0.111463	0.242045	0.460504	0.645155	0.805608	false	1163.97	1361.94	1240.09	1036.7	1063.34	1334.68	2064.16	1237.69	851.776	1014.63	968.516	1031.66	889.206	1009.45	1302.81	1501.89	1035.08	974.673	1375.32	476.637	605.54	903.994	560.721	1439.66
BCOR	-0.451741	0.197309	-2.28951	0.0220498	0.0984075	false	160.548	111.292	187.122	250.439	178.843	182.52	266.918	206.399	211.475	217.704	250.238	185.644	197.51	147.585	174.603	268.251	276.814	260.409	192.562	385.761	112.263	191.5	273.068	123.833
BDNF	0.727582	0.490365	1.48376	0.137874	0.322597	false	46.312	36.1701	187.122	237.626	31.1031	23.6299	83.041	185.901	30.2108	58.0013	26.8775	65.5758	34.4209	89.8756	41.3262	31.652	80.1096	38.8547	38.5124	38.947	54.4306	31.9167	46.9969	43.9407
BID	0.223644	0.299859	0.74583	0.45577	0.647399	false	262.434	286.578	502.275	313.34	414.059	255.04	139.39	427.643	215.671	529.163	290.091	350.969	173.743	296.117	413.262	371.911	370.408	295.13	154.05	374.633	81.6458	189.623	619.873	214.91
BIRC3	0.722287	0.533351	1.35424	0.175658	0.376857	false	52.4869	91.8163	14.7728	47.7582	39.8508	27.704	622.808	101.079	35.2459	50.8505	55.6086	30.4789	60.6463	33.1121	137.41	34.8172	17.4496	54.5619	35.0891	52.8566	102.057	74.1595	55.0998	51.131
BMP2	-0.416167	0.454177	-0.91631	0.359504	0.554204	false	29.3309	171.112	319.257	178.22	184.674	288.448	237.26	425.522	413.72	672.974	394.821	237.366	905.597	913.893	245.891	223.938	1092.98	290.997	601.65	655.608	68.0382	587.643	112.63	1300.64
BMP4	0.577804	0.474069	1.21882	0.222914	0.425931	false	142.023	144.68	70.5811	122.308	126.356	47.2598	20.7603	92.597	419.594	58.0013	125.119	84.9715	136.044	64.332	181.835	89.4169	138.011	138.058	32.5216	44.5109	44.2248	50.6913	213.107	59.9191
BMP5	0.266241	0.251653	1.05797	0.290071	0.490563	false	23.156	25.0408	18.0556	32.6153	20.4114	23.6299	59.315	19.7917	28.5324	27.0143	21.3166	43.4093	41.7968	32.166	30.9947	17.4086	26.1744	19.014	24.8191	27.8193	78.2439	31.9167	21.8779	30.359
BMP6	2.47211	0.574171	4.30552	1.67e-05	0.000573559	true	20.0685	37.5612	67.2983	458.944	64.1501	20.3706	29.6575	103.907	37.7635	121.564	78.7788	141.311	38.5186	67.1702	306.847	16.6173	18.2428	23.1475	13.6933	19.4735	61.2344	75.0982	98.0452	74.2997
BMP7	-0.815375	0.586055	-1.39129	0.164136	0.360795	false	168.267	84.8605	116.541	1078.64	398.508	21.1854	160.151	590.217	694.009	1024.96	448.576	357.434	472.058	62.4399	91.9508	557.075	741.609	1355.78	400.529	459.018	278.957	389.572	328.168	622.36
BMP8A	1.6096	0.383129	4.2012	2.66e-05	0.000799844	true	84.9053	80.687	76.3261	47.7582	294.507	39.9264	20.7603	84.8217	120.843	116.797	187.215	153.318	166.368	96.498	67.1551	59.3475	37.2787	38.8547	23.1075	33.3831	27.2153	21.5907	84.2703	128.626
BMPR1B	-0.376457	0.537895	-0.69987	0.484008	0.675556	false	95.7114	116.857	265.09	81.5384	93.3092	30.9633	109.733	69.271	193.013	117.592	33.3651	60.9578	204.067	477.76	77.4866	94.956	221.293	368.706	100.988	66.7663	799.449	343.574	65.6336	258.851
BNIP3	1.40044	0.432552	3.23762	0.00120532	0.0136891	true	1363.12	2114.56	3893.45	370.417	2578.64	1833.35	3093.28	1052.5	2744.98	2383.62	4012.16	2868.71	1534.19	5013.17	455.621	855.395	1044.6	1335.94	1051.82	384.833	1034.18	8581.85	3402.41	5736.26
BRAF	0.180184	0.247384	0.72836	0.466393	0.656035	false	458.488	226.758	317.615	535.823	173.983	401.708	216.5	239.621	521.136	200.224	248.385	287.24	313.066	368.963	289.283	334.72	360.89	213.287	248.191	197.517	370.808	206.52	284.412	188.546
BRCA1	-0.914284	0.265738	-3.44055	0.000580527	0.00874419	false	305.659	338.051	514.586	397.208	220.637	314.522	364.787	327.977	337.354	331.323	263.214	295.553	209.803	114.473	129.144	578.44	423.55	558.019	557.146	548.967	779.037	404.592	191.229	288.411
BRCA2	-1.42839	0.235883	-6.05549	1.4e-09	3.37e-07	true	310.29	318.575	358.651	372.747	333.386	283.559	195.74	199.331	240.847	188.306	121.412	138.54	195.871	164.614	208.697	546.788	498.107	581.166	866.958	631.498	466.062	286.312	180.695	367.504
BRIP1	-1.54238	0.305009	-5.05683	4.26e-07	3.42e-05	true	185.248	328.313	307.767	368.087	188.562	309.633	148.288	185.901	378.474	239.156	174.24	174.561	249.142	192.05	95.0503	1145.01	408.48	450.549	785.654	513.73	748.42	285.373	158.007	249.264
C19orf40	-0.38014	0.319281	-1.19061	0.233806	0.430131	false	94.1677	89.034	369.32	160.747	143.852	156.446	166.082	127.232	99.0242	96.1392	101.022	129.304	175.383	173.129	115.713	378.241	195.118	134.751	118.105	139.096	180.301	134.238	82.6497	198.133
CACNA1C	0.874114	0.318773	2.74212	0.00610439	0.0408655	false	265.522	57.0374	35.2906	65.2307	104.973	59.4821	62.2808	74.9258	45.3162	76.2757	73.2179	46.1801	37.6991	111.635	103.316	42.7302	34.8992	58.6953	27.3866	25.9647	91.8516	43.1815	64.8233	46.3375
CACNA1D	0.0950112	0.344022	0.276178	0.782411	0.874317	false	46.312	15.3027	20.5178	12.8132	30.1311	12.2224	17.7945	18.378	16.7838	17.4799	11.1217	11.0832	22.1277	15.1369	15.4973	20.5738	14.277	22.3208	11.1258	13.9096	47.6267	10.326	59.1513	13.5817
CACNA1E	0.271134	0.264143	1.02647	0.304672	0.509562	false	23.156	19.4762	21.3385	37.2747	31.1031	11.4075	53.3835	28.2739	27.6932	28.6034	14.8289	36.9441	29.5036	35.0042	48.5583	15.0347	20.6223	29.761	25.675	23.1827	88.4497	35.6716	31.6014	27.1633
CACNA1G	0.449025	0.41398	1.08465	0.278075	0.480977	false	117.324	36.1701	22.1592	11.6483	45.6826	27.704	26.6918	21.2054	23.4973	24.6307	35.2187	52.6454	18.03	21.7594	26.862	9.4956	21.4154	49.6017	11.9816	21.3281	30.6172	18.7745	53.4792	21.5709
CACNA1H	0.722067	0.233193	3.09644	0.00195859	0.0182979	false	256.26	94.5986	36.932	122.308	81.6455	73.3341	109.733	49.4793	86.4364	71.5085	84.3396	84.9715	62.2854	107.851	100.216	49.8519	38.865	62.0021	46.2149	37.0924	493.277	126.728	60.7718	63.1148
CACNA2D1	-0.696231	0.570973	-1.21938	0.222702	0.425931	false	361.233	65.3843	339.774	202.681	129.272	57.8525	83.041	198.624	102.381	73.8921	469.892	186.568	74.5786	212.863	137.41	568.153	90.4207	62.0021	35.9449	779.867	68.0382	43.1815	170.161	71.903
CACNA2D2	-0.248813	0.571486	-0.43538	0.663287	0.820251	false	13.8936	12.5204	13.9521	18.6373	13.6076	11.4075	41.5205	11.3096	10.9094	11.9181	8.34128	13.854	8.19545	17.0291	26.862	24.5303	11.8975	15.7072	24.8191	11.1277	27.2153	20.652	491.847	11.1849
CACNA2D3	-2.55945	0.661752	-3.86769	0.000109871	0.0024824	true	101.886	22.2585	22.9799	23.2967	57.3463	39.1115	17.7945	77.0463	11.7486	20.658	77.852	41.5621	18.8495	12.2988	20.6631	884.673	25.3813	23.1475	17.1166	103.859	30.6172	18.7745	25.119	11.9838
CACNB2	-0.461292	0.392665	-1.17477	0.240086	0.43725	false	29.3309	18.085	9.02782	24.4615	13.6076	14.6668	20.7603	11.3096	10.9094	14.3017	15.7558	17.5485	14.7518	23.6515	28.9283	66.4692	9.51797	13.2271	11.1258	12.055	30.6172	6.57109	34.0322	33.5547
CACNB3	-0.220804	0.29979	-0.736528	0.461409	0.65156	false	149.742	116.857	128.852	174.725	131.216	121.409	62.2808	84.1148	90.6323	55.6177	57.4622	43.4093	74.5786	122.988	50.6246	89.4169	75.3506	169.472	62.4757	121.478	224.526	66.6496	86.7012	67.9084
CACNB4	0.540766	0.495664	1.09099	0.275276	0.477277	false	47.8557	13.9116	31.187	26.7912	33.047	7.33341	23.726	18.378	14.2662	27.0143	19.463	14.7776	13.1127	7.56847	33.061	26.9042	10.3111	10.747	10.27	14.837	37.421	15.0196	192.039	14.3806
CACNG1	0.304236	0.2488	1.22281	0.221401	0.425931	false	30.8746	30.6054	19.6971	30.2857	25.2712	17.9261	47.452	29.6876	29.3716	26.2198	16.6826	34.1733	32.7818	50.1411	33.061	15.826	15.8633	25.6275	23.9633	32.4558	71.4401	27.2231	15.3955	24.7666
CACNG4	0.943294	0.682745	1.38162	0.167088	0.364969	false	21.6123	23.6497	185.481	18.6373	18.4674	118.964	26.6918	28.9807	234.134	224.06	43.56	40.6385	21.3082	220.432	12.3979	43.5215	41.2445	105.817	14.5491	12.9823	149.684	119.218	362.2	39.9461
CALML3	-0.375184	0.439861	-0.852959	0.393682	0.588083	false	555.744	932.075	173.991	107.165	471.406	624.155	999.458	698.365	490.925	506.916	555.159	688.084	182.758	127.718	130.178	801.587	281.573	488.577	1081.77	370.924	319.78	245.008	122.354	242.872
CALML5	-0.802777	0.753304	-1.06567	0.286571	0.488657	false	314.921	306.054	33.6492	27.956	31.1031	12.2224	56.3493	69.9779	7.55269	112.03	149.216	471.961	9.01499	44.4648	16.5305	480.319	149.908	137.231	65.0432	114.059	40.8229	23.4682	85.0806	130.224
CAMK2B	0.300544	0.284273	1.05724	0.290402	0.490563	false	29.3309	33.3877	20.5178	43.0988	22.3553	20.3706	71.178	30.3944	20.1405	27.0143	14.8289	57.2634	33.6013	51.0872	39.2599	17.4086	22.2086	24.8008	32.5216	28.7466	88.4497	27.2231	22.6882	38.3483
CAPN2	-0.179898	0.328243	-0.548063	0.583649	0.763166	false	4143.38	5488.11	3379.69	1319.76	11654.9	8331.57	6382.29	4531.6	8040.26	6013.07	7699.93	4765.79	8373.29	3133.35	3833.01	10170.6	4599.56	4710.51	7040.07	6753.6	5735.62	5386.42	4057.94	4836.67
CARD11	1.06242	0.467539	2.27236	0.0230648	0.101682	false	69.468	112.684	182.198	215.494	41.7947	108.372	50.4178	126.526	26.854	33.3706	86.1933	22.1665	28.6841	25.5436	161.172	46.6867	16.6564	52.9085	35.9449	29.6739	146.282	38.4878	28.3602	17.5763
CASP10	0.0260193	0.229069	0.113587	0.909565	0.961426	false	35.5058	25.0408	18.8764	46.5933	34.019	17.1113	59.315	31.1013	24.3365	32.5761	14.8289	33.2497	28.6841	42.5727	46.492	23.739	31.7266	23.9741	32.5216	33.3831	61.2344	26.2844	32.4116	28.7612
CASP12	0.0386642	0.231044	0.167346	0.867098	0.930806	false	27.7872	9.73809	18.8764	15.1428	18.4674	13.852	38.5548	17.6712	14.2662	15.0962	9.26809	12.9304	19.6691	18.9212	17.5636	14.2434	14.277	16.5339	15.405	16.6916	71.4401	14.0809	20.2573	23.1687
CASP3	-0.36351	0.283318	-1.28305	0.199475	0.407403	false	216.123	306.054	570.394	423.999	1155.67	617.636	234.294	583.149	287.002	673.769	337.359	373.136	471.238	248.814	698.413	917.117	663.878	545.619	530.616	701.973	146.282	367.042	533.172	552.854
CASP7	-0.344558	0.266705	-1.29191	0.196389	0.406601	false	213.035	678.884	382.451	242.285	792.156	378.078	415.205	590.217	593.306	895.445	493.989	273.386	528.606	373.693	411.196	560.24	546.49	739.892	564.849	860.543	200.713	759.43	470.779	350.727
CASP8	-0.315116	0.253795	-1.24162	0.214378	0.422331	false	728.642	1019.72	518.689	1005.25	559.855	579.34	1079.53	618.491	509.387	517.245	567.207	456.26	730.214	473.976	1448.48	748.57	472.726	452.202	1676.57	820.669	996.76	632.702	619.873	347.531
CASP9	-0.891982	0.351813	-2.53538	0.0112324	0.0634455	false	202.229	57.0374	68.119	68.7252	114.693	263.188	56.3493	89.7696	78.8837	77.8648	142.729	70.1938	99.9845	79.469	91.9508	215.234	111.836	149.632	276.434	232.755	30.6172	82.608	72.1159	135.018
CBL	0.247703	0.255135	0.970871	0.331613	0.53161	false	338.077	535.595	361.934	632.505	376.153	303.114	225.397	208.52	183.782	195.457	263.214	221.665	181.939	257.328	301.681	118.695	222.879	335.638	313.234	183.607	649.765	187.745	186.367	238.878
CBLC	0.148511	0.446517	0.3326	0.739437	0.865025	false	311.834	108.51	111.617	191.033	82.6175	242.003	435.965	155.506	151.054	100.112	139.021	248.449	14.7518	131.502	67.1551	68.0518	184.807	117.391	245.624	54.7113	244.938	331.371	89.9423	211.714
CCNA1	3.22445	0.746908	4.31706	1.58e-05	0.000571619	true	43.2245	66.7755	448.929	188.703	808.68	48.8894	640.602	279.911	641.979	1273.65	35.2187	1780.71	34.4209	43.5187	180.802	87.043	30.1402	41.3347	31.6658	59.3478	108.861	929.34	57.5307	176.562
CCNA2	-0.75772	0.316752	-2.39216	0.0167497	0.0807334	false	330.359	584.286	2013.2	766.461	1250.93	1033.2	1212.99	1294.94	1454.31	709.523	648.766	741.653	1327.66	647.104	565.136	1974.29	1455.46	1431.84	1553.33	2499.1	364.004	844.855	385.699	2417.54
CCNB1	-0.886151	0.344101	-2.57526	0.0100164	0.0584023	false	611.318	1110.14	2843.76	1407.12	2015.87	2521.88	2606.89	2633.01	1921.74	1402.36	1121.44	2364.42	2687.29	971.603	879.215	4308.63	3145.69	2870.28	3941.11	3333.68	870.889	4531.24	640.13	3357.87
CCND1	2.68353	0.577247	4.64884	3.34e-06	0.000160892	true	1610.11	1174.14	1709.54	239.956	654.136	774.082	3920.72	1779.84	5672.91	1057.53	1573.72	880.193	1420.27	1262.99	477.318	127.399	418.791	300.09	236.21	278.193	598.736	6692.19	798.947	262.046
CCND2	1.82147	0.745681	2.44269	0.0145781	0.0731943	true	171.354	297.707	1232.71	1634.26	327.554	544.302	62.2808	237.501	58.7432	129.51	162.192	197.651	154.894	120.15	598.197	94.956	91.2139	89.283	99.2765	269.847	27.2153	112.647	3639.83	182.953
CCND3	0.233659	0.232925	1.00315	0.315788	0.517721	false	338.077	329.704	292.994	238.791	550.135	179.261	346.993	279.911	362.529	371.844	278.97	254.914	168.826	433.295	575.467	235.807	280.78	282.73	356.026	243.882	299.368	266.599	257.673	300.395
CCNE1	-0.0845586	0.385798	-0.219179	0.826511	0.900575	false	143.567	126.595	492.427	163.077	190.506	272.151	530.869	460.157	198.888	166.059	204.825	222.588	108.999	131.502	169.437	274.581	403.721	124.004	275.578	185.462	244.938	189.623	75.3571	334.748
CCNE2	-1.68432	0.313135	-5.37891	7.49e-08	9.03e-06	true	74.0991	187.806	411.997	272.571	268.264	243.632	255.055	286.273	241.686	239.156	169.606	329.726	433.539	140.963	207.664	602.179	1772.72	639.035	682.098	769.667	163.292	196.194	135.319	716.633
CCR7	1.55925	0.548533	2.84259	0.00447481	0.0332837	true	26.2434	114.075	14.7728	31.4505	29.1591	14.6668	14.8288	113.096	16.7838	30.987	72.2911	30.4789	31.1427	17.0291	154.973	7.913	10.3111	36.3746	7.70249	16.6916	37.421	38.4878	48.6175	22.3698
CD14	-0.209639	0.410476	-0.510723	0.609545	0.782322	false	467.751	567.592	273.297	533.494	316.862	268.892	507.143	1151.45	474.981	839.033	409.65	524.606	595.809	500.465	1672.68	320.476	390.237	494.363	1864.86	436.763	241.536	505.035	637.699	480.152
CD19	1.03254	0.659962	1.56454	0.11769	0.293415	false	15.4373	45.9081	15.5935	38.4395	22.3553	14.6668	32.6233	74.2189	20.9797	27.8089	40.7796	20.3193	18.03	23.6515	423.594	27.6955	23.0018	35.5479	28.2424	16.6916	27.2153	112.647	95.6144	27.9623
CD40	-0.028125	0.387704	-0.0725424	0.94217	0.975916	false	108.061	191.98	210.923	131.626	108.861	261.558	65.2465	315.961	122.521	301.13	122.339	140.388	382.727	126.772	323.378	227.894	103.111	129.791	361.161	184.535	40.8229	303.209	209.865	95.8706
CDC14A	0.486409	0.287276	1.69317	0.0904222	0.261245	false	177.529	104.337	137.059	186.373	130.244	59.4821	80.0753	174.591	201.405	90.5774	122.339	131.152	136.044	105.959	150.841	152.721	38.0719	76.0559	88.1507	115.914	105.459	85.4242	144.232	68.7073
CDC14B	0.191246	0.388021	0.492876	0.6221	0.789085	false	94.1677	75.1224	86.1747	180.549	47.6266	138.52	80.0753	76.3395	67.9742	152.551	53.7549	199.498	97.5258	76.6308	99.1829	163.008	92.8002	49.6017	120.672	41.7289	23.8134	235.621	102.097	176.562
CDC25A	-0.752926	0.388756	-1.93676	0.0527747	0.179137	false	21.6123	108.51	202.716	167.736	55.4023	97.7788	145.322	74.9258	105.738	88.9884	76.9252	90.5131	67.2027	71.9005	42.3594	181.999	128.493	128.138	251.615	80.6759	346.995	114.525	37.2734	141.409
CDC25B	-0.476764	0.428553	-1.1125	0.265924	0.466659	false	118.867	1474.63	576.96	834.021	624.977	569.562	1788.35	680.694	1649	953.447	529.208	971.63	533.524	615.885	512.445	1036.6	1128.67	1097.02	1041.55	2053.06	278.957	913.382	311.152	2174.67
CDC25C	-1.55107	0.373815	-4.1493	3.33e-05	0.000964444	true	61.7493	57.0374	214.206	76.879	104.973	154.002	127.527	79.1669	162.803	95.3447	52.8281	64.6522	212.262	90.8217	64.0556	221.564	212.568	143.018	553.723	465.509	156.488	236.559	64.013	170.969
CDC6	-0.621212	0.34889	-1.78054	0.0749878	0.22876	false	104.974	613.5	875.699	562.615	538.472	448.968	317.335	698.365	924.785	730.181	438.381	745.347	317.983	210.025	299.615	705.048	797.923	832.482	904.614	989.439	275.555	1121.78	191.229	990.663
CDC7	-1.52672	0.258377	-5.9089	3.44e-09	6.22e-07	true	230.016	311.619	256.062	172.395	193.422	231.41	204.637	248.103	201.405	119.181	167.752	165.325	293.397	91.7677	128.111	412.267	787.612	543.138	464.717	634.28	568.119	404.592	191.229	429.021
CDH1	0.429151	0.358395	1.19742	0.231142	0.427857	false	2931.55	4347.36	5750.72	2212.02	5742.4	8809.87	4137.22	5543.8	4138.04	6822.71	3998.25	6694.27	2256.21	8708.47	1418.52	6258.39	4824.03	4891.55	2196.06	2117.05	1034.18	6858.34	2362.81	6782.05
CDK2	-1.07029	0.24963	-4.28751	1.81e-05	0.000588938	true	324.184	528.639	341.416	417.01	338.246	299.855	255.055	187.314	306.304	236.773	341.066	241.984	247.503	266.789	179.769	409.893	631.359	663.009	765.114	443.254	1404.99	258.15	176.643	357.118
CDK4	-0.399096	0.247272	-1.614	0.106528	0.281349	false	282.503	513.337	998.805	1053.01	597.762	560.599	174.979	575.374	715.828	779.443	496.77	822.93	805.613	770.092	455.621	1081.71	1114.4	960.619	558.002	1002.42	210.918	624.254	743.037	1025.02
CDK6	2.24517	0.664338	3.37956	0.000726027	0.0100946	true	589.706	1446.8	1575.77	816.548	685.239	1149.72	1557.02	370.388	14548.2	521.218	1180.75	812.77	977.717	649.943	554.804	218.399	602.805	617.541	347.468	139.096	3180.79	1256.02	675.783	993.06
CDKN1A	-0.768435	0.369056	-2.08217	0.0373274	0.139833	false	2151.96	1949.01	1286.05	864.307	1734.97	1830.09	2224.31	1297.06	3262.76	2293.83	3025.11	1602.45	1389.13	1654.66	882.314	2165	6157.33	2103.94	4387.85	1910.26	659.971	3582.18	585.841	3500.88
CDKN1B	-0.324804	0.257439	-1.26167	0.207066	0.415399	false	316.465	236.497	138.7	288.879	92.3372	154.002	234.294	212.761	112.451	99.3174	107.51	122.839	89.3304	183.535	275.852	96.5386	172.91	312.491	263.596	128.896	261.947	224.356	162.869	109.452
CDKN1C	-1.18513	0.43989	-2.69416	0.0070566	0.0461012	true	145.111	33.3877	109.155	41.934	131.216	69.26	100.836	165.402	92.3107	224.06	106.583	123.763	107.36	326.39	239.692	141.643	694.812	252.969	338.909	156.715	204.115	82.608	265.776	424.228
CDKN2A	-1.74887	0.521849	-3.3513	0.000804331	0.0107691	true	27.7872	45.9081	307.767	82.7032	136.076	99.4085	56.3493	17.6712	340.71	201.018	18.5362	126.534	104.902	157.992	32.0278	368.746	355.338	308.357	504.085	446.036	102.057	81.6693	62.3924	333.15
CDKN2B	-0.181006	0.679704	-0.266302	0.790007	0.880085	false	61.7493	1239.52	4756.84	672.109	1111.93	1398.24	1236.72	50.1861	2087.9	1905.3	192.776	2392.13	835.936	5122.91	272.753	2162.62	2070.16	1118.52	2465.65	1046.93	3041.31	2037.04	428.644	3332.3
CDKN2C	-2.06859	0.3004	-6.88614	5.73e-12	2.07e-09	true	253.172	262.928	312.691	145.604	184.674	335.707	255.055	327.977	240.847	299.541	208.532	123.763	264.713	141.909	369.87	1717.91	692.432	825.041	433.051	1926.95	163.292	411.163	226.071	427.423
CDKN2D	-0.104305	0.335853	-0.310567	0.75613	0.867677	false	106.518	137.724	469.447	106	155.515	106.742	335.13	255.172	196.37	147.784	179.801	80.3534	115.556	117.311	198.366	200.199	233.983	155.419	172.022	227.191	187.105	249.701	103.717	237.28
CEBPA	0.290092	0.43776	0.662674	0.50754	0.705675	false	390.564	226.758	608.147	499.714	203.142	443.264	133.459	875.784	140.984	598.288	892.517	304.789	154.074	467.353	359.538	346.589	526.661	423.268	398.818	210.499	47.6267	572.624	1164.39	430.619
CEBPE	0.92944	0.444322	2.09182	0.0364549	0.137994	false	92.6239	20.8673	128.852	24.4615	16.5235	18.7409	47.452	20.4986	21.8189	30.1925	18.5362	18.4721	19.6691	20.8133	23.7626	11.8695	23.0018	16.5339	11.1258	18.5462	74.842	27.2231	24.3087	24.7666
CHEK1	-0.485362	0.314587	-1.54286	0.122866	0.301126	false	101.886	343.616	578.601	311.011	347.965	625.784	192.774	223.364	312.178	259.02	252.092	211.505	256.518	175.967	166.338	425.719	543.318	381.106	297.829	486.838	306.172	229.049	192.039	580.017
CHEK2	-0.327153	0.218923	-1.49438	0.135077	0.318113	false	265.522	233.714	202.716	413.516	157.459	235.484	195.74	173.884	123.361	174.799	207.605	116.374	190.954	96.498	188.034	191.495	173.703	258.755	295.262	214.209	370.808	163.339	82.6497	146.203
CHUK	0.259086	0.190387	1.36083	0.173566	0.374592	false	356.602	845.823	750.951	606.878	633.725	414.745	563.493	646.765	632.748	761.168	638.572	613.272	709.726	518.44	504.18	401.98	552.835	796.934	453.591	373.706	683.784	768.818	537.223	556.849
CIC	-0.566247	0.214129	-2.64442	0.00818304	0.050567	false	1268.95	584.286	478.475	627.845	312.975	466.894	616.876	387.352	467.428	232.005	565.354	201.345	294.217	438.971	492.815	637.788	498.9	671.276	942.271	333.831	2133	365.165	353.287	195.736
CLCF1	0.0103454	0.45245	0.0228652	0.981758	0.995457	false	32.4184	100.163	134.597	78.0439	44.7106	111.631	32.6233	36.7561	40.281	25.4252	93.6077	101.596	50.8118	57.7096	26.862	59.3475	70.5916	78.536	99.2765	16.6916	30.6172	133.299	17.0161	38.3483
CNTFR	0.819265	0.648984	1.26238	0.206812	0.415399	false	38.5933	13.9116	40.2148	36.1098	566.659	21.1854	47.452	24.0328	67.9742	32.5761	13.9021	51.7218	38.5186	31.22	78.5198	28.4868	56.3147	25.6275	56.4849	42.6562	64.6363	24.4069	37.2734	28.7612
COL11A1	1.48949	0.945329	1.57563	0.11511	0.288975	false	7635.3	784.612	538.386	637.164	3487.43	319.411	35.589	97.5449	1816.84	1017.8	187.215	402.691	595.809	2133.36	368.836	619.588	101.525	1020.14	14.5491	295.812	401.425	209.336	13892.4	1979.73
COL11A2	0.502372	0.25631	1.96002	0.0499939	0.171306	false	60.2056	22.2585	14.7728	16.3077	22.3553	13.852	32.6233	15.5506	21.8189	14.3017	13.9021	12.0068	18.8495	19.8672	22.7294	10.2869	13.4838	19.014	15.405	6.49117	44.2248	18.7745	21.0676	16.7774
COL1A1	1.73009	0.611474	2.82938	0.00466378	0.0340597	true	139510	33186	17759.4	14148.1	69697.1	16953.2	1038.01	25652.2	45672.8	40067.8	30475.3	32975.4	25504.2	72472.9	34889.6	10092.2	9328.4	31291.2	2541.82	6294.58	10648	14735.2	68686.8	36573.8
COL1A2	1.66904	0.572714	2.91427	0.00356524	0.028326	true	52851.2	8452.66	5812.28	3873.07	19903	5354.21	1129.95	7057.87	14624.5	9683.84	8307.92	13077.3	8284.78	23085.7	10682.8	3935.13	3025.92	8346.31	682.954	2958.12	6385.38	4754.65	22434.5	12317
COL24A1	1.17439	0.37473	3.13397	0.00172461	0.0178058	true	46.312	27.8231	32.0077	30.2857	131.216	23.6299	14.8288	67.1505	52.8689	78.6594	41.7064	53.569	78.6763	45.4108	47.5251	29.2781	26.9676	38.028	9.41415	16.6916	30.6172	16.8971	29.9808	63.9138
COL27A1	0.557413	0.451167	1.23549	0.216647	0.425017	false	1199.48	1153.27	659.031	225.978	507.369	904.454	563.493	260.827	741.003	262.992	417.991	194.88	158.992	558.175	182.868	56.1823	375.96	628.288	242.2	207.717	2275.88	402.714	325.737	206.122
COL2A1	0.135298	0.281501	0.480629	0.63078	0.797297	false	75.6429	48.6905	160.859	89.6922	101.085	77.4082	71.178	74.9258	52.8689	54.8232	35.2187	78.5062	104.902	81.3611	66.1219	47.478	65.0395	53.7352	129.231	63.0571	74.842	88.2404	84.2703	100.664
COL3A1	1.3832	0.594689	2.32592	0.020023	0.0917459	true	51469.6	13120	23130.9	11457.3	86777.5	12113.2	949.04	34415.7	29667	40380.9	23342.6	37461.3	35632.2	64559.1	34101.4	14893.8	13996.2	28848.3	1611.53	16036	5514.5	13416.3	114698	79784.3
COL4A4	0.453853	0.400954	1.13193	0.257662	0.456592	false	60.2056	13.9116	22.9799	19.8022	60.2622	12.2224	17.7945	26.1533	15.9446	27.8089	19.463	37.8677	34.4209	54.8714	41.3262	40.3563	18.2428	23.9741	7.70249	28.7466	20.4115	28.1618	88.3217	54.3267
COL4A5	0.211139	0.521552	0.404829	0.685603	0.831589	false	1508.23	1686.08	1981.2	415.846	634.697	2175.58	201.671	229.018	1777.4	1866.37	1329.04	583.717	2413.56	3067.12	111.581	1008.91	2335.87	889.524	1280.32	798.414	289.162	1520.74	958.574	851.651
COL4A6	1.48752	0.712456	2.08787	0.0368095	0.138611	false	510.975	333.877	836.305	71.0549	201.198	1019.34	50.4178	36.0492	245.043	749.25	602.426	261.38	473.697	775.769	14.4642	111.573	515.557	209.154	29.0983	11.1277	95.2535	658.987	90.7526	211.714
COL5A1	1.35943	0.48501	2.80289	0.00506473	0.0359	true	7439.25	5478.37	4061.7	1274.33	12591.9	3278.04	346.993	4171.81	12849.6	7018.96	7828.76	9187.08	7381.64	13416.1	4809.34	1563.61	6331.83	4259.96	1133.98	2960.9	894.702	4377.29	14894	12187.6
COL5A2	1.48547	0.44502	3.33799	0.000843876	0.010895	true	5560.52	3402.77	2027.16	1120.57	8596.11	3280.48	753.301	3318.65	5569.69	5615.8	4177.13	4326.16	6772.72	7745.39	3634.64	1795.46	3288.46	1992.33	238.777	2092.01	1537.66	2347.76	10923.5	6221.21
COL6A6	0.830293	0.421043	1.97199	0.0486106	0.167359	false	49.3994	16.6939	16.4142	25.6263	26.2432	18.7409	26.6918	18.378	12.5878	11.1235	12.0485	12.0068	14.7518	10.4067	56.8235	11.0782	10.3111	9.92034	13.6933	10.2004	20.4115	10.326	75.3571	14.3806
COMP	-1.08676	0.928401	-1.17057	0.241773	0.438361	false	344.252	31.9966	51.7048	62.901	695.931	62.7414	14.8288	51.5998	130.074	793.744	155.704	883.888	181.119	514.656	430.826	1979.04	19.0359	1233.43	19.6841	395.961	20.4115	264.721	3233.87	376.292
CREB3L1	1.69597	0.51217	3.31134	0.000928513	0.0113782	true	707.029	178.068	169.066	102.505	695.931	125.483	50.4178	262.947	428.825	459.243	352.187	395.302	379.449	548.714	299.615	119.486	164.185	166.166	11.1258	143.733	122.469	116.402	747.088	578.419
CREB3L4	-0.821196	0.247551	-3.31728	0.000908989	0.011331	false	44.7682	33.3877	32.8284	37.2747	48.5985	79.0379	44.4863	45.2382	45.3162	42.9051	41.7064	49.8745	42.6163	68.1163	68.1882	140.851	70.5916	76.8826	53.0616	86.2398	64.6363	47.8751	92.3732	41.5439
CREB5	1.01258	0.468087	2.16322	0.030524	0.125379	false	180.617	229.541	1250.76	205.011	468.49	237.114	169.048	470.053	339.032	325.761	289.164	165.325	540.9	178.805	257.256	253.216	422.757	87.6296	130.086	76.9667	353.799	212.152	2124.58	258.851
CREBBP	0.0823169	0.208134	0.395499	0.692475	0.834432	false	27.7872	23.6497	23.8006	41.934	28.1871	30.9633	83.041	39.5834	27.6932	38.9324	43.56	30.4789	29.5036	47.303	40.293	26.9042	38.0719	31.4144	39.3683	25.9647	64.6363	34.7329	33.2219	31.9569
CRLF2	0.593107	0.367278	1.61487	0.106339	0.281349	false	18.5248	36.1701	10.6692	25.6263	13.6076	13.0372	17.7945	54.4272	11.7486	20.658	23.1702	17.5485	25.4059	9.46059	35.1273	7.913	11.8975	24.8008	9.41415	17.6189	30.6172	12.2035	29.1705	18.3752
CSF1R	0.248072	0.266285	0.9316	0.351543	0.548954	false	37.0496	33.3877	25.442	26.7912	37.9069	22.8151	26.6918	38.8766	27.6932	44.4942	19.463	23.0901	31.1427	22.7054	69.2214	18.1999	15.8633	27.2809	41.0799	31.5285	30.6172	34.7329	25.9293	20.772
CSF2	0.918341	0.722567	1.27094	0.203749	0.413793	false	4.6312	100.163	13.1314	10.4835	55.4023	12.2224	130.493	33.9287	186.3	41.316	83.4128	29.5553	258.157	49.1951	10.3316	3.1652	99.9387	18.1873	22.2516	56.5659	78.2439	207.459	24.3087	31.158
CSF3R	1.94422	0.61283	3.17254	0.00151114	0.0165538	true	200.685	404.826	50.8841	126.967	91.3652	206.965	88.9725	1427.83	88.1148	242.334	427.259	178.255	55.729	255.436	865.784	33.2346	62.66	96.7233	67.6107	122.405	506.885	60.0786	294.136	144.605
CTNNB1	0.102506	0.299847	0.341861	0.732456	0.86059	false	3984.37	3767.25	8433.63	5530.63	9920.9	5028.28	4083.84	4132.94	8471.6	7112.71	5618.32	7895.88	6403.92	5482.41	3803.04	12307.9	3553.38	2226.29	5520.11	6526.41	1643.12	4431.73	12407.2	7118.39
CUL1	0.222626	0.256734	0.867146	0.385862	0.582418	false	592.793	840.258	1304.11	1461.87	2207.35	1246.68	732.54	1447.62	532.045	975.694	1258.61	1726.21	987.551	599.802	1000.09	1144.22	1568.88	1050.73	647.009	833.651	476.267	1300.14	957.764	963.5
CXXC4	-0.0645473	0.227656	-0.28353	0.776771	0.874317	false	20.0685	19.4762	11.49	25.6263	10.6917	12.2224	38.5548	21.2054	15.9446	11.9181	13.9021	24.9373	21.3082	18.9212	22.7294	13.4521	17.4496	18.1873	20.54	21.3281	54.4306	17.8358	19.447	23.1687
CYLD	0.0151762	0.2488	0.0609975	0.951361	0.98262	false	1154.71	1275.69	631.127	456.615	1138.18	891.417	1046.91	1060.98	897.931	1196.58	765.544	935.61	1320.29	1518.42	1209.82	869.639	609.15	886.217	1634.64	1022.82	1615.91	1178.1	566.394	1407.7
DAXX	-0.237357	0.170463	-1.39243	0.163792	0.360795	false	588.162	971.027	755.054	1013.41	1348.12	955.788	554.595	761.981	1001.99	1106	1167.78	849.715	625.313	1040.67	704.612	989.916	1225.44	1106.94	1034.7	1050.64	758.626	735.962	798.947	977.88
DDB2	-0.579456	0.273584	-2.11802	0.0341733	0.132835	false	1352.31	699.751	591.733	559.12	679.407	1537.57	358.856	472.881	727.576	539.492	528.281	722.257	481.892	373.693	584.766	1069.05	759.851	977.153	896.912	1246.3	646.363	738.778	501.57	639.138
DDIT3	-0.27301	0.378049	-0.722155	0.470199	0.660105	false	574.268	658.017	799.373	1398.97	458.77	642.896	516.041	266.481	866.881	727.798	473.599	577.252	2269.32	554.391	338.875	1407.72	507.625	847.362	617.055	1058.06	959.339	473.119	667.68	361.113
DDIT4	0.461852	0.432711	1.06734	0.285817	0.488524	false	2394.33	916.772	1932.77	295.868	430.583	1262.16	2215.42	283.446	580.718	375.817	1321.63	604.96	678.583	1736.02	1506.34	598.223	188.773	1165.64	1058.66	670.445	1466.22	1205.33	556.67	953.913
DKK1	3.69373	0.693882	5.32328	1.02e-07	1.05e-05	true	72.5554	397.871	757.516	290.044	58.3182	72.5193	157.185	26.1533	604.216	294.774	69.5107	172.714	1430.93	159.884	49.5914	26.1129	27.7607	24.8008	18.8283	21.3281	428.641	106.076	24.3087	152.594
DKK2	-0.134553	0.43514	-0.309218	0.757156	0.867677	false	41.6808	22.2585	18.8764	62.901	22.3553	23.6299	53.3835	29.6876	27.6932	41.316	15.7558	33.2497	27.8645	35.0042	65.0888	57.7649	24.5881	33.8945	32.5216	30.6012	64.6363	35.6716	313.583	25.5655
DKK4	-0.277297	0.363616	-0.762609	0.445697	0.640633	false	29.3309	25.0408	18.0556	41.934	15.5515	23.6299	97.8698	68.5642	18.4621	43.6996	24.097	42.4857	19.6691	26.4897	45.4588	83.8778	30.1402	33.0678	22.2516	21.3281	64.6363	24.4069	21.8779	30.359
DLL1	-0.114629	0.438291	-0.261536	0.793679	0.880107	false	277.872	472.993	334.85	104.835	203.142	396.004	438.931	195.797	473.302	387.735	345.7	274.31	221.277	342.473	88.8513	165.382	425.136	603.487	194.274	104.786	1483.23	288.189	75.3571	120.637
DLL3	-0.368086	0.404092	-0.910895	0.362351	0.557403	false	20.0685	11.1292	81.2504	46.5933	29.1591	25.2595	65.2465	15.5506	21.8189	15.8908	18.5362	35.0969	18.8495	23.6515	19.6299	37.1911	34.1061	34.7212	63.3315	12.9823	183.703	34.7329	22.6882	45.5386
DLL4	0.0735184	0.263916	0.278567	0.780577	0.874317	false	129.674	97.3809	65.6569	112.989	95.2531	132.816	50.4178	84.1148	62.0999	65.1522	86.1933	63.7286	47.5336	157.046	70.2545	56.1823	57.901	137.231	95.8532	48.2201	156.488	77.9144	47.8072	71.1041
DNMT1	-0.70813	0.272101	-2.60245	0.00925592	0.0557669	false	211.491	968.245	2122.36	733.845	770.773	717.045	536.801	924.556	853.454	830.293	877.688	599.418	825.282	343.419	638.49	1311.18	1834.59	1365.7	1164.79	1474.42	248.339	1037.29	591.513	1231.14
DNMT3A	-0.00901045	0.292336	-0.0308222	0.975411	0.994113	false	583.531	246.235	390.658	662.79	385.872	412.301	329.198	447.434	281.128	295.568	370.724	507.982	272.908	376.532	348.173	533.336	255.399	383.586	415.078	411.725	129.273	214.969	683.886	193.339
DTX1	0.821239	0.359406	2.28499	0.0223134	0.098973	false	54.0306	13.9116	19.6971	12.8132	11.6636	10.5927	20.7603	31.8081	33.5675	21.4526	26.8775	27.7081	37.6991	68.1163	32.0278	12.6608	11.1043	23.1475	12.8375	17.6189	34.0191	20.652	21.0676	15.9784
DTX3	-0.101719	0.362682	-0.280462	0.779123	0.874317	false	217.666	72.3401	116.541	187.538	59.2902	77.4082	20.7603	52.3067	64.6175	56.4123	100.095	54.4926	54.9095	101.228	88.8513	85.4604	69.7985	57.0419	132.654	78.8213	139.478	30.978	132.077	29.5601
DTX4	0.953841	0.401748	2.37423	0.0175858	0.0831013	false	379.758	65.3843	86.1747	53.5823	122.468	85.5565	86.0068	121.578	109.934	81.8375	131.607	50.7982	99.1649	274.357	127.078	53.0171	30.1402	56.2152	135.221	35.2378	44.2248	62.8947	92.3732	49.5332
DUSP10	-0.160568	0.47339	-0.339188	0.734468	0.860649	false	480.101	801.306	205.998	287.714	1263.56	242.003	400.376	180.246	855.972	549.026	723.838	242.908	931.003	561.959	225.228	1386.36	210.189	443.108	355.17	565.659	1017.17	208.397	1167.63	361.912
DUSP2	-0.851169	0.520073	-1.63663	0.101707	0.279597	false	32.4184	33.3877	24.6213	60.5714	48.5985	22.8151	23.726	72.8053	35.2459	54.8232	63.9498	37.8677	131.127	29.3278	102.282	25.3216	49.9693	42.1614	329.495	17.6189	27.2153	27.2231	55.0998	54.3267
DUSP4	1.29786	0.355817	3.64754	0.000264766	0.00531357	true	29.3309	114.075	144.445	50.0878	156.487	321.855	100.836	109.561	171.194	65.9467	78.7788	150.547	120.473	76.6308	105.382	27.6955	56.3147	46.2949	75.3132	47.2928	23.8134	119.218	116.682	71.903
DUSP5	1.0946	0.374007	2.92668	0.00342602	0.0275224	true	433.789	1954.57	882.264	582.417	758.137	1432.46	2936.09	1144.39	1442.56	1092.49	1119.59	583.717	1547.3	1205.28	1105.48	226.312	476.692	853.149	947.406	261.501	1496.84	1541.39	521.828	560.044
DUSP6	1.05118	0.487439	2.15654	0.0310413	0.125379	false	301.028	3617.01	1153.92	1542.24	6097.17	4126.27	750.335	1011.5	4129.65	1285.56	2385.61	2100.27	5274.59	959.304	756.27	1468.65	942.279	537.352	1887.96	626.861	360.602	3698.59	773.018	1728.07
DUSP8	-0.0593094	0.247071	-0.24005	0.810292	0.891691	false	20.0685	16.6939	29.5456	34.945	47.6266	53.7784	32.6233	43.8245	35.2459	24.6307	39.8528	23.0901	40.9772	19.8672	29.9615	43.5215	53.9352	20.6674	36.8008	25.9647	13.6076	22.5295	30.7911	26.3644
E2F1	-0.741862	0.312158	-2.37656	0.017475	0.0831013	false	58.6618	69.5578	178.915	167.736	73.8698	105.927	68.2123	146.317	120.843	137.455	81.5592	109.909	139.323	86.0914	55.7904	167.756	231.604	111.604	178.869	219.772	214.32	98.5664	70.4953	267.639
E2F5	0.585629	0.455072	1.28689	0.198131	0.406601	false	149.742	119.639	269.193	232.967	57.3463	44.0005	201.671	77.0463	291.198	89.7829	116.778	136.693	227.833	188.266	293.416	250.051	72.9711	52.9085	89.0065	115.914	91.8516	180.236	596.374	102.262
EFNA1	-0.166874	0.305396	-0.54642	0.584777	0.763166	false	1011.14	1096.23	851.077	498.549	750.361	761.045	447.828	484.897	667.994	487.847	389.26	369.441	331.096	1361.38	371.936	550.745	650.395	889.524	1116.86	331.05	847.076	412.101	674.162	349.928
EFNA2	0.222675	0.272756	0.816388	0.414278	0.607019	false	37.0496	23.6497	13.1314	30.2857	33.047	17.9261	65.2465	12.0164	25.1756	27.8089	25.9507	34.1733	28.6841	47.303	38.2267	20.5738	15.0701	24.8008	41.0799	19.4735	47.6267	34.7329	24.3087	23.1687
EFNA3	1.21861	0.334259	3.6457	0.000266664	0.00531357	true	334.99	249.017	592.553	377.406	672.604	506.82	394.445	921.022	453.162	798.512	875.835	1074.15	129.488	941.329	584.766	235.807	356.131	396.813	225.084	173.407	122.469	594.214	858.909	583.213
EFNA5	-0.560777	0.454518	-1.23378	0.217284	0.425017	false	32.4184	27.8231	63.1947	45.4285	168.151	39.1115	38.5548	48.0656	16.7838	101.701	50.0477	60.9578	69.6613	145.693	57.8567	68.8431	149.115	28.9343	78.7365	277.266	10.2057	30.978	167.73	109.452
EGF	-0.00826475	0.631501	-0.0130875	0.989558	0.995913	false	117.324	44.517	118.182	57.0769	16.5235	11.4075	23.726	47.3588	18.4621	54.8232	14.8289	17.5485	22.1277	19.8672	17.5636	145.599	13.4838	11.5737	5.13499	15.7643	6.80382	12.2035	44.566	17.5763
EGFR	0.969595	0.527462	1.83823	0.066029	0.209381	false	3941.15	2906.12	10297.5	542.812	5295.3	5821.91	2064.16	2000.38	16551.3	2525.84	3693.33	3522.62	3818.26	23963.7	1693.34	4153.53	3195.66	2246.96	1854.59	5134.51	1122.63	2726.06	1835.31	2949.62
EIF4EBP1	0.389037	0.447304	0.869737	0.384444	0.581492	false	367.408	1093.45	1430.5	1213.76	881.577	2112.84	5118.88	869.422	2532.67	1975.22	610.767	2305.31	1943.96	1589.38	1163.33	1932.35	1766.38	880.43	580.254	1608.88	789.243	936.85	396.232	2463.08
ENDOG	-0.514504	0.340873	-1.50937	0.131204	0.311857	false	81.8178	258.755	898.679	202.681	288.675	344.67	231.329	300.41	388.544	483.874	281.75	617.89	310.607	190.158	290.317	818.204	999.387	203.367	286.704	449.745	190.507	566.053	230.123	327.558
EP300	-0.143502	0.192464	-0.745604	0.455907	0.647399	false	1071.35	1399.5	1261.43	1054.17	1062.36	1064.16	937.177	1359.97	1077.52	1322.91	1313.29	1015.96	1411.26	1056.75	945.337	1414.05	1284.93	892.004	1786.12	1369.64	255.143	1321.73	1234.07	925.152
EPHA2	-0.126831	0.456774	-0.277666	0.781269	0.874317	false	640.649	715.054	529.359	336.637	423.779	1032.38	3140.73	482.07	712.471	940.734	778.52	903.283	625.313	246.921	546.539	599.805	1452.28	677.89	1104.02	246.664	646.363	1292.63	183.936	692.665
EPO	2.30484	0.673719	3.42107	0.000623743	0.00920339	true	43.2245	161.374	292.994	12.8132	15.5515	30.1485	29.6575	39.5834	90.6323	42.9051	16.6826	10.1596	9.01499	15.1369	9.2984	11.0782	15.8633	11.5737	7.70249	9.2731	30.6172	11.2647	14.5852	23.9677
EPOR	-0.0551336	0.251509	-0.219212	0.826485	0.900575	false	69.468	50.0816	80.4297	51.2527	63.1781	77.4082	154.219	44.5314	58.7432	50.056	41.7064	51.7218	78.6763	60.5478	69.2214	37.9824	75.3506	70.2691	79.5924	54.7113	166.694	90.1178	43.7557	47.1364
ERBB2	0.00386781	0.418043	0.00925219	0.992618	0.995913	false	2920.74	962.68	1389.46	1020.39	1776.76	1056.01	2081.96	1467.41	717.506	1079.78	1122.37	1443.59	339.292	627.237	571.335	1924.44	556.008	1053.21	1278.61	1096.08	663.372	1108.64	3814.85	591.202
ERCC2	0.0609749	0.208455	0.292509	0.769897	0.874317	false	296.397	175.286	146.087	255.099	148.712	192.298	216.5	139.956	206.44	136.661	286.384	199.498	117.195	162.722	215.929	110.782	171.323	151.285	251.615	158.57	945.731	198.071	205.814	272.432
ERCC6	-0.126597	0.292422	-0.432924	0.66507	0.820251	false	276.328	372.83	317.615	279.56	329.498	674.674	394.445	327.977	859.329	525.19	303.993	514.447	415.509	297.063	188.034	515.136	267.296	454.682	363.728	612.024	636.157	467.486	243.898	391.472
ETS2	-1.04376	0.397488	-2.62588	0.00864242	0.0529531	true	1921.95	3921.67	2314.41	474.087	2355.08	6655.48	5427.32	2562.32	5656.97	1843.33	3563.58	1523.94	4594.37	5540.12	2886.64	7287.08	5513.28	5781.08	11960.2	4688.48	2837.19	2224.78	2031.4	4028.16
ETV1	0.23305	0.46651	0.49956	0.617385	0.78448	false	126.586	69.5578	86.1747	188.703	243.965	38.2967	14.8288	218.416	87.2756	135.072	88.0469	122.839	146.699	104.067	79.5529	236.599	69.0053	109.95	27.3866	92.731	61.2344	43.1815	265.776	148.599
ETV4	1.43911	0.63817	2.25506	0.0241294	0.105094	false	71.0117	137.724	96.0232	1162.5	94.2811	136.89	56.3493	232.553	157.767	152.551	92.6809	355.587	36.06	49.1951	37.1936	37.1911	143.563	94.2432	41.0799	27.8193	68.0382	305.086	153.145	155.79
ETV7	-1.62099	0.493136	-3.28711	0.00101223	0.0121973	true	47.8557	154.418	24.6213	109.494	131.216	21.1854	44.4863	149.852	25.1756	163.675	30.5847	34.1733	62.2854	27.4357	138.443	137.686	238.742	213.287	392.827	187.317	81.6458	194.317	60.7718	52.7288
EYA1	1.08434	0.5104	2.1245	0.0336287	0.132744	false	43.2245	12.5204	15.5935	57.0769	9.71971	14.6668	47.452	23.326	28.5324	11.9181	47.2673	50.7982	48.3531	25.5436	177.703	14.2434	11.8975	17.3606	17.9725	27.8193	40.8229	50.6913	19.447	14.3806
EZH2	-1.04918	0.343576	-3.05371	0.00226034	0.0204278	true	228.472	347.789	448.108	978.46	385.872	437.56	361.822	566.185	177.069	208.169	376.285	445.177	222.916	127.718	279.985	899.708	1117.57	709.304	572.551	374.633	625.951	464.67	279.55	352.325
FANCA	-1.23475	0.394499	-3.12992	0.00174856	0.0178058	true	52.4869	115.466	161.68	100.176	61.2341	360.152	186.842	114.509	83.0796	64.3577	92.6809	113.603	63.9245	80.415	57.8567	233.433	293.471	372.839	306.388	178.043	54.4306	154.89	63.2027	230.888
FANCB	-0.992842	0.319767	-3.10489	0.00190351	0.0182979	false	114.236	105.728	136.238	228.307	62.2061	86.3713	157.185	118.043	172.034	193.073	103.803	52.6454	100.804	66.2241	50.6246	197.825	130.079	277.769	195.985	243.882	506.885	136.115	72.1159	82.289
FANCC	-1.00689	0.282647	-3.56235	0.000367554	0.00659019	true	333.446	313.01	618.816	638.329	317.834	573.636	166.082	190.849	434.699	467.983	186.289	249.373	380.269	245.029	219.029	735.118	677.362	666.316	791.644	683.427	636.157	542.584	406.766	582.414
FANCE	-0.462949	0.368377	-1.25673	0.208853	0.41598	false	257.803	173.895	504.737	433.318	217.721	409.856	385.548	161.161	249.239	411.571	394.821	151.471	133.586	447.486	115.713	318.103	529.041	655.569	261.029	230.9	476.267	438.386	115.872	469.766
FANCF	0.478735	0.350999	1.36392	0.172593	0.373606	false	118.867	169.721	242.93	145.604	155.515	169.483	130.493	114.509	61.2607	82.632	109.363	134.846	61.4659	175.967	167.371	159.051	118.975	31.4144	43.6474	170.625	78.2439	161.461	221.209	105.458
FANCG	-0.628272	0.293702	-2.13915	0.0324238	0.129525	false	111.149	244.843	281.504	349.45	104.001	136.89	100.836	192.262	178.747	220.882	107.51	103.444	81.1349	104.067	106.415	219.981	220.5	267.022	267.02	228.118	217.722	121.096	161.248	123.833
FANCL	-0.971378	0.224059	-4.33537	1.46e-05	0.000571619	false	253.172	226.758	459.598	450.791	213.834	483.19	198.705	240.328	250.917	251.074	224.288	183.797	302.412	211.917	324.411	485.858	483.83	522.471	569.984	758.539	207.517	269.415	258.483	223.698
FAS	-0.687409	0.365481	-1.88083	0.0599947	0.196272	false	132.761	223.976	86.1747	65.2307	251.74	404.967	133.459	252.344	114.969	282.856	214.093	135.77	401.577	132.448	288.25	599.805	158.633	234.781	401.385	367.215	51.0286	230.927	231.743	177.361
FASLG	-0.449243	0.262216	-1.71326	0.0866655	0.255752	false	21.6123	36.1701	30.3663	57.0769	31.1031	26.8892	53.3835	43.8245	20.9797	27.8089	30.5847	30.4789	31.1427	27.4357	53.7241	29.2781	23.7949	60.3487	42.7916	71.4028	40.8229	47.8751	29.9808	25.5655
FBXW7	-0.520016	0.270748	-1.92067	0.0547738	0.185053	false	259.347	214.238	313.512	166.571	167.179	271.336	237.26	165.402	269.379	214.526	461.551	196.727	466.321	317.876	426.693	250.051	846.306	329.851	379.133	318.067	156.488	264.721	312.772	315.574
FEN1	-0.309449	0.28107	-1.10097	0.270911	0.471973	false	87.9927	276.84	887.189	429.824	467.518	1005.49	246.157	889.214	631.07	623.713	620.035	599.418	594.99	490.059	226.261	1028.69	1054.12	574.553	294.406	1175.83	68.0382	715.31	287.653	806.911
FGF1	1.00895	0.495203	2.03745	0.0416045	0.149652	false	236.191	91.8163	190.405	26.7912	244.937	37.4819	65.2465	38.1697	218.189	127.921	87.1201	66.4994	204.886	48.249	30.9947	63.304	76.9369	23.9741	25.675	121.478	51.0286	87.3016	107.769	63.9138
FGF10	-3.34409	0.724663	-4.61468	3.94e-06	0.0001779	true	38.5933	11.1292	9.02782	24.4615	21.3834	13.0372	32.6233	11.3096	10.9094	9.53447	26.8775	32.3261	13.9323	19.8672	55.7904	977.255	15.8633	11.5737	20.54	9.2731	23.8134	22.5295	46.1866	12.7828
FGF11	0.427687	0.523674	0.816704	0.414098	0.607019	false	1324.52	841.649	865.85	143.275	167.179	516.598	293.609	282.739	989.403	187.511	1317	379.601	181.119	252.598	171.504	520.675	278.401	769.653	83.8715	357.942	163.292	335.126	330.599	413.043
FGF12	-0.259254	0.628772	-0.412318	0.680107	0.829203	false	74.0991	43.1258	123.927	192.198	47.6266	17.1113	32.6233	130.06	23.4973	15.0962	24.097	48.0273	26.2254	21.7594	24.7957	66.4692	15.0701	116.564	12.8375	111.277	78.2439	18.7745	256.862	31.158
FGF13	1.50439	0.565192	2.66173	0.00777402	0.0484536	true	72.5554	23.6497	428.411	194.527	32.075	19.5558	68.2123	57.2546	24.3365	37.3433	36.1456	76.659	142.601	53.9254	116.747	50.6432	28.5539	36.3746	16.2608	31.5285	81.6458	59.1398	86.7012	35.9515
FGF14	0.496759	0.310503	1.59985	0.109631	0.287186	false	26.2434	22.2585	27.0835	82.7032	23.3273	44.8153	68.2123	29.6876	23.4973	23.8362	25.9507	53.569	34.4209	25.5436	58.8898	20.5738	30.1402	21.4941	26.5308	25.0374	71.4401	64.7722	22.6882	39.9461
FGF16	0.289043	0.289728	0.997636	0.318456	0.519737	false	20.0685	27.8231	17.2349	38.4395	20.4114	38.2967	97.8698	24.0328	23.4973	22.2471	14.8289	31.4025	36.06	39.7345	45.4588	17.4086	30.1402	18.1873	29.0983	24.1101	64.6363	26.2844	26.7396	31.158
FGF18	0.232188	0.374569	0.61988	0.535337	0.728905	false	41.6808	16.6939	12.3107	18.6373	15.5515	13.852	17.7945	19.7917	16.7838	11.9181	7.41447	14.7776	17.2104	17.0291	19.6299	17.4086	10.3111	15.7072	9.41415	15.7643	37.421	10.326	95.6144	17.5763
FGF2	1.13641	0.585348	1.94142	0.0522074	0.178047	false	71.0117	27.8231	159.218	547.472	68.0379	39.1115	38.5548	136.421	46.1554	139.839	94.5345	72.9646	437.637	52.0333	279.985	118.695	85.6617	38.8547	26.5308	103.859	47.6267	93.8727	226.882	134.219
FGF20	0.225329	0.238338	0.945419	0.344445	0.542557	false	49.3994	37.5612	17.2349	33.7802	35.9629	17.9261	38.5548	37.4629	45.3162	42.1106	21.3166	38.7913	36.06	50.1411	48.5583	23.739	21.4154	45.4682	32.5216	28.7466	37.421	35.6716	32.4116	29.5601
FGF21	0.1443	0.197321	0.731295	0.464599	0.654785	false	41.6808	29.2143	32.0077	53.5823	32.075	30.1485	68.2123	37.4629	34.4067	38.1379	23.1702	41.5621	45.075	38.7884	59.923	27.6955	23.7949	32.2411	47.0707	39.8743	88.4497	44.1202	40.5146	46.3375
FGF22	0.112188	0.290258	0.386511	0.699118	0.838963	false	55.5744	22.2585	21.3385	29.1208	19.4394	26.8892	106.767	29.6876	21.8189	21.4526	10.1949	40.6385	23.7668	33.1121	21.6963	14.2434	19.8291	32.2411	36.8008	22.2554	68.0382	21.5907	24.3087	31.158
FGF23	0.207634	0.242641	0.855725	0.39215	0.588083	false	32.4184	20.8673	13.1314	23.2967	17.4955	20.3706	74.1438	22.6191	22.6581	18.2744	15.7558	20.3193	20.4886	35.0042	36.1604	12.6608	22.2086	23.9741	21.3958	16.6916	51.0286	21.5907	20.2573	23.1687
FGF4	0.251149	0.261679	0.959761	0.337176	0.534897	false	37.0496	22.2585	22.9799	40.7692	24.2993	29.3336	94.904	33.2218	32.7283	26.2198	18.5362	48.9509	28.6841	53.9254	53.7241	22.9477	26.9676	25.6275	37.6566	28.7466	74.842	27.2231	25.9293	37.5493
FGF7	2.20578	0.640543	3.44361	0.000573994	0.00874419	true	64.8368	23.6497	36.1113	34.945	43.7387	30.9633	62.2808	89.7696	35.2459	40.5215	160.338	239.213	51.6313	94.6059	414.295	40.3563	5.55215	24.8008	0.855832	44.5109	61.2344	183.991	300.618	132.621
FGF9	-0.35138	0.309225	-1.13632	0.255821	0.455793	false	37.0496	12.5204	18.0556	24.4615	34.019	19.5558	29.6575	16.2575	24.3365	20.658	17.6094	18.4721	20.4886	14.1909	22.7294	16.6173	57.901	29.761	12.8375	12.055	44.2248	16.8971	20.2573	15.9784
FGFR1	0.888655	0.40544	2.19183	0.0283921	0.119346	false	571.181	193.371	155.114	179.384	516.116	255.855	41.5205	254.465	234.973	332.117	293.799	372.212	209.803	508.98	532.075	196.242	224.465	261.236	65.899	120.55	217.722	207.459	593.133	392.271
FGFR2	0.445012	0.457834	0.971995	0.331053	0.53161	false	84.9053	278.231	120.645	287.714	137.048	81.4824	106.767	258.706	152.732	250.28	417.991	163.478	137.684	143.801	100.216	141.643	128.493	291.823	63.3315	80.6759	95.2535	141.748	790.844	77.4954
FGFR3	0.195846	0.512605	0.38206	0.702417	0.838963	false	3471.85	926.51	4768.33	577.758	1839.94	3524.93	2328.11	1280.1	909.68	1728.12	2290.15	972.554	259.796	3091.72	1541.47	2515.54	1856	2098.15	1189.61	1230.54	833.468	952.808	7107.06	1109.7
FGFR4	-0.603837	0.358255	-1.68549	0.0918933	0.262604	false	18.5248	11.1292	18.0556	33.7802	21.3834	24.4447	53.3835	19.0849	22.6581	31.7816	19.463	21.2429	22.9473	23.6515	16.5305	14.2434	13.4838	19.014	109.546	24.1101	95.2535	39.4266	15.3955	21.5709
FLNA	0.267384	0.286128	0.934489	0.350051	0.547808	false	1607.03	3675.43	2691.11	1840.44	5055.22	7907.05	4095.7	4614.3	7571.16	5614.21	5876.9	4047.23	8772.41	4467.29	2883.54	6399.24	3784.98	3056.29	4060.07	3800.11	949.133	9844.43	5116.99	4537.08
FLNC	0.85078	0.35429	2.40137	0.0163339	0.079258	false	143.567	22.2585	97.6646	85.0329	175.927	59.4821	130.493	80.5806	94.8283	81.8375	105.656	88.6659	32.7818	58.6557	185.968	47.478	46.0035	81.0161	33.3774	50.0747	156.488	86.3629	127.216	147.002
FLT1	0.112786	0.187912	0.600204	0.54837	0.735569	false	260.891	221.194	498.172	227.143	471.406	488.894	154.219	300.41	440.574	257.431	414.284	309.407	412.231	300.847	173.57	369.537	456.069	224.034	275.578	379.27	64.6363	269.415	348.425	365.107
FLT3	0.6316	0.475549	1.32815	0.184129	0.385869	false	18.5248	52.8639	6.56569	26.7912	20.4114	14.6668	17.7945	32.515	12.5878	23.8362	45.4136	13.854	19.6691	15.1369	129.144	13.4521	15.0701	23.9741	20.54	13.9096	78.2439	15.0196	44.566	12.7828
FN1	1.51475	0.582878	2.59874	0.00935662	0.0559077	true	3664.82	2895	2892.19	2187.56	19705.7	2349.14	210.568	2731.96	14630.4	5315.47	3816.6	6552.96	6127.74	18786.8	4865.13	5210.71	2281.14	2121.3	452.735	4186.8	799.449	1743.22	20751.6	17722.5
FOS	-1.9217	0.69179	-2.77787	0.00547172	0.038039	true	1369.29	8177.22	1940.98	693.076	5578.14	16532	4083.84	2129.73	1942.72	2037.2	4071.47	3687.95	3661.73	2920.48	9155.82	6604.98	33597.6	4059.9	42978.2	1158.21	625.951	13719.5	1075.26	1799.17
FOSL1	-0.116607	0.606405	-0.192292	0.847514	0.917294	false	152.829	2154.9	449.75	193.362	459.742	1433.27	545.698	376.043	580.718	645.96	530.135	1088.93	599.087	500.465	95.0503	248.468	1047.77	697.73	1467.75	108.495	306.172	1346.14	45.3763	481.75
FOXL2	0.260064	0.301709	0.861968	0.388705	0.585304	false	33.9621	23.6497	13.9521	40.7692	35.9629	26.0744	80.0753	28.9807	38.6027	85.0157	28.7311	49.8745	39.3381	36.8963	52.6909	23.739	29.3471	25.6275	37.6566	41.7289	81.6458	32.8555	25.9293	29.5601
FOXO4	-0.142242	0.470452	-0.302352	0.762384	0.869406	false	299.484	100.163	93.5611	1053.01	152.599	279.484	133.459	133.594	100.703	129.51	134.387	165.325	195.052	242.191	170.471	132.938	92.0071	156.245	531.472	217.918	91.8516	102.321	294.136	98.2674
FST	1.07151	0.627832	1.70669	0.08788	0.258282	false	302.572	3544.67	1554.43	920.219	339.218	2997.74	1752.76	829.132	785.48	311.459	494.916	1013.19	615.478	280.034	130.178	231.851	481.451	1497.97	81.304	89.949	1751.98	1746.97	604.477	1430.87
FUBP1	-0.322952	0.207901	-1.5534	0.120328	0.296021	false	2605.82	1929.53	2746.1	1416.44	830.063	1909.13	1711.24	1249	1929.29	1606.56	1492.16	1891.54	1554.68	1908.2	1142.67	2187.15	1712.44	1658.35	2882.44	1917.68	3476.75	1571.43	1580.88	1740.05
FUT8	0.757888	0.346748	2.1857	0.0288373	0.119923	false	155.917	257.364	183.019	556.79	200.226	189.854	68.2123	226.898	255.952	179.566	218.727	200.422	311.427	157.046	538.274	231.851	127.699	129.791	97.5648	166.916	153.086	254.395	410.818	185.35
FZD10	0.0746745	0.483757	0.154364	0.877323	0.937564	false	95.7114	116.857	150.19	561.45	88.4493	462.82	71.178	209.227	237.49	297.158	162.192	193.957	118.834	395.453	64.0556	45.1041	265.71	446.415	86.439	226.264	64.6363	117.341	95.6144	145.404
FZD2	0.377926	0.289151	1.30702	0.191206	0.397359	false	47.8557	29.2143	27.9042	87.3625	38.8788	28.5188	35.589	33.2218	44.477	48.4669	32.4383	39.7149	31.1427	51.0872	48.5583	18.9912	24.5881	45.4682	38.5124	25.9647	68.0382	34.7329	108.579	31.9569
FZD3	1.59764	0.393249	4.06267	4.85e-05	0.00129912	true	89.5365	44.517	84.5332	295.868	115.665	278.67	65.2465	80.5806	108.255	175.593	101.949	150.547	145.059	251.652	140.509	22.9477	37.2787	37.2013	101.844	34.3105	85.0477	90.1178	130.457	67.1094
FZD7	0.412265	0.69623	0.592139	0.553757	0.74142	false	253.172	158.592	398.045	2330.83	178.843	59.4821	103.801	151.265	401.132	373.433	478.234	508.905	150.796	219.486	247.957	119.486	55.5215	106.644	250.759	942.147	244.938	165.216	1797.23	131.023
FZD8	-0.0131793	0.442472	-0.0297856	0.976238	0.994113	false	41.6808	65.3843	41.8563	25.6263	33.047	74.1489	38.5548	38.1697	27.6932	32.5761	28.7311	30.4789	27.8645	51.0872	39.2599	62.5127	51.5557	23.9741	44.5033	22.2554	61.2344	48.8138	466.728	34.3536
FZD9	-0.509257	0.353812	-1.43934	0.150053	0.339026	false	16.9811	12.5204	12.3107	32.6153	8.74774	11.4075	32.6233	14.1369	19.3013	27.0143	13.9021	25.8609	22.1277	23.6515	15.4973	37.9824	15.0701	28.9343	36.8008	13.9096	27.2153	17.8358	8.10291	56.7235
GADD45A	0.0989404	0.306095	0.323235	0.746518	0.865025	false	493.994	1997.7	1633.21	1071.65	1644.57	744.749	1183.33	862.353	1424.94	1136.99	1443.97	1275.5	2573.37	1157.98	1064.15	2133.34	1117.57	825.041	1181.9	878.162	2476.59	1111.45	902.664	1817.55
GADD45B	-0.650494	0.391959	-1.6596	0.0969956	0.272871	false	558.831	606.544	166.604	454.285	379.069	251.78	607.979	528.015	341.55	375.817	430.039	347.275	347.487	1264.88	610.595	269.042	527.454	528.258	2326.15	173.407	3568.6	303.209	840.272	460.179
GADD45G	0.441532	0.451434	0.978065	0.328042	0.529977	false	89.5365	52.8639	109.155	137.45	36.9349	23.6299	65.2465	55.1341	38.6027	74.6867	39.8528	32.3261	35.2404	81.3611	47.5251	38.7737	40.4514	42.9881	57.3407	26.892	272.153	49.7526	486.175	27.1633
GAS1	0.632587	0.494462	1.27934	0.200776	0.408905	false	1639.44	698.36	134.597	262.088	868.942	479.931	44.4863	356.958	467.428	549.026	239.117	340.809	361.419	895.918	589.932	167.756	325.197	729.145	106.123	262.429	520.492	439.324	830.548	671.893
GATA1	0.0633492	0.258593	0.244977	0.806474	0.888843	false	41.6808	18.085	18.8764	46.5933	22.3553	13.852	83.041	24.7396	21.8189	23.8362	23.1702	36.0205	28.6841	29.3278	33.061	15.0347	16.6564	33.0678	32.5216	31.5285	71.4401	30.0393	21.8779	28.7612
GATA2	-0.0276592	0.259408	-0.106624	0.915087	0.963039	false	111.149	72.3401	68.119	57.0769	45.6826	44.0005	62.2808	65.7368	52.8689	67.5358	60.2426	55.4162	59.0072	34.0581	76.4535	31.652	97.5592	66.1356	61.6199	29.6739	193.909	56.3236	86.7012	41.5439
GDF6	0.0970501	0.396147	0.244985	0.806468	0.888843	false	23.156	18.085	18.8764	15.1428	58.3182	17.1113	26.6918	14.1369	25.1756	17.4799	8.34128	16.6248	45.8945	56.7635	20.6631	13.4521	10.3111	15.7072	31.6658	51.9293	17.0095	22.5295	23.4984	26.3644
GHR	0.991371	0.493721	2.00796	0.0446477	0.157465	false	32.4184	123.813	361.934	54.7472	47.6266	76.5934	26.6918	161.161	55.3864	112.825	90.8273	58.187	23.7668	87.9835	50.6246	93.3734	59.4873	13.2271	43.6474	45.4382	17.0095	28.1618	42.9454	144.605
GLI1	1.48391	0.741708	2.00066	0.0454289	0.159442	false	49.3994	22.2585	354.547	336.637	13.6076	21.1854	80.0753	38.1697	67.1351	27.8089	48.1941	41.5621	31.9622	21.7594	46.492	17.4086	36.4856	28.1076	27.3866	41.7289	44.2248	35.6716	802.188	23.1687
GLI3	-0.114355	0.353011	-0.32394	0.745983	0.865025	false	500.169	514.728	876.519	103.67	1223.71	743.119	249.123	270.722	923.107	337.679	891.59	353.74	563.027	791.852	362.637	1006.53	853.445	557.192	433.051	762.249	81.6458	319.167	992.607	679.883
GNA11	-0.260807	0.199568	-1.30686	0.19126	0.397359	false	1063.63	1151.88	770.648	944.68	1500.72	673.044	1503.64	735.121	914.715	863.664	872.127	555.085	793.319	816.449	593.031	940.856	1024.77	1029.23	1372.75	752.048	1850.64	526.626	634.458	634.344
GNAQ	0.473646	0.253298	1.86992	0.0614955	0.198402	false	719.379	1041.98	1457.58	818.878	787.296	1536.76	462.657	807.926	1052.34	1437.32	698.814	455.336	735.951	973.495	908.143	667.066	472.726	720.878	837.859	650.044	789.243	980.031	511.294	837.27
GNAS	0.276773	0.274687	1.00759	0.313649	0.517721	false	1153.17	2217.5	2703.42	1854.42	1258.7	1701.35	462.657	2133.97	2271.68	2153.2	2436.58	2168.62	1888.23	3320.67	2409.32	1463.9	1940.08	1366.53	1545.63	2419.35	1357.36	932.156	2120.53	2597.3
GNG12	-0.0734432	0.279683	-0.262594	0.792863	0.880107	false	3511.99	5673.13	4737.14	1270.83	7980.85	3731.08	4555.39	4720.33	3935.79	4774.38	4314.3	5549.93	5198.37	3734.1	1733.63	6179.26	6302.48	4306.25	3314.64	5840.2	1006.97	6158.99	2524.87	5816.15
GNG4	-0.0359784	0.65315	-0.0550844	0.956071	0.984602	false	69.468	34.7789	80.4297	78.0439	56.3743	127.927	94.904	38.1697	73.8486	293.185	25.0238	630.821	62.2854	22.7054	82.6524	348.172	138.011	47.1216	97.5648	10.2004	30.6172	35.6716	50.2381	143.806
GNG7	0.155718	0.416481	0.37389	0.708486	0.842493	false	20.0685	19.4762	15.5935	12.8132	14.5796	16.2965	26.6918	16.2575	12.5878	16.6853	10.1949	23.0901	16.3909	22.7054	73.354	11.8695	15.0701	17.3606	30.8099	17.6189	13.6076	19.7133	81.8394	16.7774
GNGT1	0.208586	0.343406	0.607402	0.543584	0.732198	false	60.2056	8.34694	27.9042	37.2747	17.4955	19.5558	47.452	12.7232	17.623	15.0962	9.26809	17.5485	22.1277	39.7345	30.9947	32.4433	11.1043	10.747	15.405	23.1827	40.8229	29.1005	10.5338	17.5763
GPC4	2.34484	0.758268	3.09236	0.00198571	0.0182979	true	47.8557	306.054	168.246	313.34	180.787	16.2965	68.2123	39.5834	1848.73	58.7959	443.015	84.0479	286.841	103.12	81.6193	125.817	15.0701	30.5877	41.9358	51.002	61.2344	30.0393	703.333	31.9569
GRB2	-0.0164611	0.193933	-0.0848799	0.932357	0.971847	false	1116.12	2299.58	2806.83	2691.93	2758.45	2614.77	1773.52	3186.47	2669.46	3314.02	3147.44	3374.84	3270.8	2139.99	2652.11	4656.8	2111.4	2262.66	2213.18	2631.7	1643.12	2477.3	1998.18	1838.32
GRIA3	1.57068	0.543517	2.88985	0.00385427	0.0299639	true	603.599	275.449	64.8362	62.901	277.012	170.298	91.9383	112.389	190.496	104.085	398.528	183.797	718.741	149.477	144.642	13.4521	107.077	181.873	29.9541	63.9844	207.517	80.7306	279.55	154.991
GRIN2A	0.661031	0.314932	2.09897	0.0358198	0.137025	false	47.8557	30.6054	25.442	30.2857	48.5985	26.8892	74.1438	24.0328	22.6581	37.3433	73.2179	52.6454	79.4958	50.1411	44.4257	34.0259	23.7949	19.014	30.8099	25.9647	91.8516	32.8555	28.3602	22.3698
GSK3B	0.0952265	0.249559	0.381579	0.702773	0.838963	false	498.626	687.231	887.189	633.67	792.156	811.564	349.959	370.388	490.086	432.229	504.184	610.501	698.252	710.49	315.112	543.623	325.197	591.087	763.402	579.569	200.713	232.804	500.76	486.543
GTF2H3	0.54618	0.210634	2.59303	0.00951351	0.0563792	false	294.853	549.507	1065.28	486.9	820.343	1342.01	427.068	940.814	1262.14	1222	896.224	1280.11	1178.51	611.154	419.461	825.326	935.934	676.236	365.44	479.419	187.105	1266.34	733.314	1245.52
GZMB	-0.37944	0.625695	-0.606429	0.54423	0.732198	false	80.2741	189.197	13.9521	212	170.095	20.3706	26.6918	410.678	62.9391	133.483	227.995	59.1106	417.148	22.7054	546.539	161.425	127.699	236.435	350.035	259.647	142.88	294.76	107.769	155.79
H2AFX	-0.127402	0.344236	-0.370101	0.711307	0.844459	false	74.0991	371.439	927.403	606.878	413.088	273.781	263.952	327.977	391.901	670.591	244.678	318.643	346.667	269.627	176.67	569.736	640.084	449.722	225.94	474.783	139.478	501.28	289.274	817.297
H3F3A	-0.678932	0.223849	-3.03299	0.00242144	0.0210927	false	9341.12	11353.2	13592.6	10570.9	15981.1	17405.4	18366.9	14536.3	11661.4	15207.5	13821.5	12148.1	7675.86	8276.13	8788.02	25451.4	17812.1	16693.4	25906.9	18015.8	4493.92	11313.5	13221.5	9762.03
H3F3C	-0.483189	0.238661	-2.02458	0.0429102	0.152828	false	2175.12	6047.36	9645.82	5471.22	15630.3	13570.9	5118.88	12829.3	12760.7	19108.7	14512.9	16070.7	21532.7	12411.4	9106.23	30566.3	14601.4	11553.9	12239.2	21962.4	1275.72	11427.1	13760.4	11317.5
HDAC1	-0.0781952	0.212637	-0.367741	0.713066	0.845159	false	1179.41	1514.97	1692.31	1379.16	1869.1	1878.98	824.479	2655.62	2357.28	2376.47	1738.69	2742.18	1898.07	904.433	913.309	1561.23	2691.21	2113.03	1638.06	2181.03	255.143	1593.96	935.886	1724.07
HDAC10	0.209548	0.248578	0.842988	0.399235	0.593924	false	998.795	542.551	160.039	557.955	193.422	284.373	355.89	285.566	121.682	143.812	299.359	141.311	177.022	247.867	299.615	117.112	138.804	352.999	349.179	122.405	782.439	181.174	127.216	81.49
HDAC11	-0.272091	0.224227	-1.21346	0.224953	0.425931	false	333.446	158.592	103.41	101.341	118.58	199.632	163.116	156.213	176.23	139.839	163.118	101.596	139.323	199.618	88.8513	129.773	134.838	214.114	261.029	149.297	217.722	117.341	153.145	107.056
HDAC2	-0.232938	0.360941	-0.645364	0.518691	0.715675	false	248.541	1201.96	1698.05	2941.21	3133.63	1251.57	507.143	2690.97	3388.64	3061.36	1584.84	2935.21	1948.88	1718.99	1438.15	3277.56	2329.52	1607.09	1590.14	6187.01	115.665	1527.31	3871.57	3178.11
HDAC4	0.522488	0.323812	1.61355	0.106625	0.281349	false	94.1677	129.378	205.178	354.109	154.543	120.594	174.979	253.051	163.642	305.897	216.873	452.565	114.736	159.884	304.781	117.904	226.052	102.51	130.086	267.065	54.4306	238.437	269.827	197.334
HDAC5	-0.0717085	0.265746	-0.269839	0.787284	0.878405	false	1630.18	513.337	695.963	599.889	290.619	335.707	352.924	460.157	297.912	327.35	407.796	301.094	199.149	514.656	402.93	379.824	341.854	558.846	585.389	313.431	840.272	278.802	489.416	235.682
HDAC6	-0.313014	0.204898	-1.52766	0.126596	0.308018	false	707.029	360.309	228.158	320.329	248.824	424.523	456.726	273.55	375.956	254.252	240.044	181.95	230.292	217.594	273.786	311.772	176.082	415.001	491.247	393.179	523.894	278.802	342.753	209.318
HELLS	-0.773179	0.281867	-2.74306	0.0060869	0.0408655	false	419.895	585.677	1029.17	536.988	273.124	1059.27	438.931	804.392	688.974	654.7	715.497	424.857	559.749	256.382	347.14	792.882	1195.3	1512.02	676.107	1022.82	598.736	813.877	540.464	934.739
HES1	-0.907375	0.293067	-3.09614	0.00196059	0.0182979	false	913.89	538.377	724.688	340.131	653.164	485.635	809.65	434.004	465.749	542.67	449.502	603.113	293.397	456.947	248.99	1124.44	444.172	378.626	1192.17	1532.84	1177.06	810.122	547.757	490.538
HES5	0.186068	0.584748	0.318202	0.750332	0.866597	false	44.7682	236.497	275.759	53.5823	46.6546	92.8899	124.562	307.478	48.6729	235.184	81.5592	172.714	43.4359	48.249	60.9562	15.826	329.163	173.606	35.0891	44.5109	132.674	271.292	46.9969	203.725
HGF	0.484564	0.345204	1.4037	0.160408	0.356846	false	126.586	68.1666	40.2148	66.3955	78.7296	66.0007	88.9725	111.682	53.708	77.8648	75.9984	91.4367	53.2704	54.8714	175.636	56.1823	46.0035	40.508	36.8008	102.004	119.067	45.9976	226.882	80.6911
HHEX	0.240848	0.437953	0.54994	0.58236	0.763166	false	46.312	129.378	59.0912	122.308	204.114	66.8155	32.6233	319.495	87.2756	355.953	150.143	155.165	177.022	112.581	423.594	213.651	99.9387	108.297	114.681	204.008	78.2439	136.115	247.949	150.996
HHIP	0.552865	0.553673	0.99854	0.318017	0.519737	false	46.312	16.6939	9.84853	36.1098	17.4955	19.5558	20.7603	10.6027	14.2662	15.8908	12.9753	22.1665	14.7518	11.3527	11.3647	17.4086	13.4838	14.8805	5.13499	9.2731	23.8134	18.7745	367.872	15.1795
HIST1H3B	-1.24301	0.353381	-3.51748	0.000435658	0.00715865	true	2405.13	4738.28	11254.4	10631.4	9154.02	7936.38	4454.56	6151.69	8740.98	6597.85	6027.04	5465.88	5225.42	2023.62	4939.51	21204.5	18091.3	12989	3393.37	37921.4	1721.37	6187.15	7885.75	12347.3
HIST1H3G	-1.38009	0.379076	-3.64067	0.000271925	0.00531357	true	1012.69	2132.64	4326.79	3325.6	2523.24	1982.47	860.068	2051.27	2812.96	1192.6	1788.74	1986.67	1892.33	627.237	2034.28	5736.92	6447.63	2784.31	1620.09	13284.6	2432.37	3661.98	1877.44	5502.97
HIST1H3H	-0.95797	0.320339	-2.99049	0.00278534	0.0236994	false	1786.1	3749.17	10432.1	3855.6	5565.5	6036.21	3644.91	5020.74	7878.3	5481.52	4259.61	3861.58	7423.44	1486.26	3276.13	9472.65	11530.2	12260.7	2845.64	20983.2	1711.16	10427.4	3451.84	11691.4
HMGA1	0.045812	0.35177	0.130233	0.896382	0.951666	false	1000.34	1252.04	774.751	1754.24	663.856	1280.9	2304.39	625.56	434.699	1055.94	1623.77	1018.73	461.404	782.391	545.506	668.648	854.238	1315.27	1647.48	209.572	949.133	817.632	341.943	664.703
HMGA2	1.32779	0.478688	2.77381	0.00554044	0.0381499	true	54.0306	70.949	268.372	110.659	49.5705	89.6306	74.1438	23.326	78.8837	30.1925	26.8775	90.5131	63.1049	67.1702	24.7957	18.1999	32.5197	46.2949	20.54	23.1827	251.741	46.9364	41.3249	36.7504
HNF1A	0.217018	0.256198	0.847071	0.396956	0.59175	false	26.2434	23.6497	22.1592	30.2857	24.2993	19.5558	59.315	18.378	29.3716	23.0416	12.9753	40.6385	35.2404	35.0042	33.061	18.9912	21.4154	23.9741	21.3958	27.8193	85.0477	27.2231	20.2573	32.7558
HOXA10	0.23493	0.291165	0.806861	0.419747	0.613085	false	189.879	75.1224	116.541	85.0329	69.0099	119.779	154.219	130.06	67.9742	90.5774	83.4128	38.7913	54.09	58.6557	77.4866	85.4604	40.4514	39.6813	122.384	82.5306	61.2344	55.3849	76.1674	46.3375
HOXA11	0.955823	0.450296	2.12266	0.0337828	0.132744	false	35.5058	20.8673	109.155	15.1428	25.2712	16.2965	35.589	71.3916	27.6932	25.4252	15.7558	12.9304	23.7668	12.2988	25.8289	29.2781	20.6223	10.747	5.99082	16.6916	27.2153	14.0809	24.3087	23.1687
HOXA9	0.025251	0.504595	0.0500421	0.960089	0.984602	false	878.384	303.272	1141.61	273.736	215.777	569.562	605.013	1033.41	491.764	318.61	570.914	89.5895	63.1049	176.913	199.399	728.787	407.686	110.777	606.785	405.234	159.89	337.003	226.071	227.693
HRAS	0.445827	0.277667	1.60561	0.108359	0.284884	false	353.515	390.915	746.847	355.274	521.948	448.153	513.075	373.922	389.383	224.06	189.069	190.262	442.554	396.399	176.67	267.459	371.201	192.62	254.182	357.014	231.33	306.964	224.451	385.08
HSP90B1	0.299407	0.189786	1.5776	0.114658	0.288975	false	2760.19	3249.74	3424.01	3458.39	4007.43	4516.57	2544.61	2391.26	5187.86	3081.22	3549.68	2851.16	3630.58	3077.53	3603.65	2449.07	2019.4	2481.74	2729.25	4223.9	4228.57	3372.85	3430.77	2310.48
HSPA1A	-1.7608	0.374182	-4.70573	2.53e-06	0.000140685	true	1384.73	546.724	304.484	386.725	192.45	331.633	934.211	395.128	393.579	332.912	454.136	214.276	203.247	997.146	193.2	402.772	1284.93	1723.66	2986	299.521	4487.12	257.211	143.422	178.16
HSPA2	-0.834498	0.624512	-1.33624	0.181471	0.383635	false	1494.33	9301.27	159.218	649.977	695.931	1676.91	1654.89	284.859	1815.16	1200.55	2425.46	1387.25	4097.72	859.022	287.217	2159.46	3575.58	3024.05	1947.02	4963.89	2398.35	2547.71	325.737	1119.29
HSPA6	-0.970737	0.513557	-1.89022	0.0587284	0.193884	false	702.398	392.306	74.6847	94.3515	163.291	226.521	121.596	446.727	254.274	195.457	386.479	217.047	367.976	1613.03	639.523	261.92	1101.71	610.101	1276.05	363.505	408.229	165.216	155.576	218.106
HSPB1	-0.903473	0.392349	-2.30273	0.0212941	0.0962228	false	18585	14456.9	20168.2	4182.92	11695.7	13255.5	31048.4	7762.6	4247.13	7385.24	10657.4	5893.51	8760.11	13939.2	3882.6	26011.6	17646.3	13164.3	24167	16282.6	14277.8	9085.94	1904.99	4547.46
IBSP	0.649427	0.360705	1.80044	0.0717917	0.224501	false	47.8557	16.6939	11.49	20.967	17.4955	4.88894	26.6918	15.5506	25.1756	15.8908	16.6826	27.7081	37.6991	19.8672	14.4642	24.5303	6.34531	10.747	11.9816	10.2004	44.2248	23.4682	46.1866	19.1741
ID1	-1.30536	0.399622	-3.2665	0.00108887	0.0126976	true	1637.9	3177.4	4298.88	3070.5	3901.49	6346.66	8167.68	2859.9	2395.88	3339.45	3088.13	6381.17	5159.03	4015.08	2227.48	10836.9	6146.23	2530.51	21120.2	8562.78	4721.85	3165.39	1178.16	6065.42
ID2	-1.03182	0.419001	-2.46256	0.0137947	0.0712597	true	86.449	134.942	163.321	158.417	241.049	61.1118	97.8698	453.796	85.5972	184.333	101.022	106.214	696.613	103.12	258.289	454.997	669.431	171.953	348.324	747.412	37.421	365.165	445.66	217.307
ID4	-0.624433	0.485645	-1.28578	0.19852	0.406601	false	94.1677	90.4251	176.453	182.879	362.545	52.1487	112.699	98.2518	139.305	143.812	169.606	137.617	223.736	110.689	174.603	477.154	504.452	96.7233	38.5124	209.572	149.684	69.4658	713.867	75.8976
IDH1	0.418525	0.332299	1.25948	0.207856	0.415399	false	296.397	268.493	844.512	679.098	611.37	466.894	278.781	546.393	588.271	1117.12	368.87	713.021	684.32	417.212	402.93	1043.72	278.401	216.594	211.39	717.738	34.0191	262.844	422.162	400.26
IDH2	-0.329464	0.328143	-1.00402	0.315367	0.517721	false	1821.6	1563.66	1144.89	772.285	1229.54	2883.66	1301.96	2368.64	3274.51	1215.64	1470.85	2169.54	648.26	1091.75	2071.48	3153.33	1830.62	2053.51	1156.23	3308.64	544.306	1110.51	2534.59	1583.46
IGF1	0.477422	0.430952	1.10783	0.267934	0.467914	false	84.9053	37.5612	20.5178	43.0988	43.7387	34.2226	74.1438	51.5998	46.9945	58.0013	60.2426	75.7354	32.7818	69.0623	251.057	61.7214	29.3471	62.0021	38.5124	39.8743	34.0191	87.3016	151.524	66.3105
IGF1R	0.195754	0.385603	0.507655	0.611695	0.782322	false	5744.23	3362.42	2082.14	3810.17	2930.49	7981.2	2443.78	1456.81	3170.45	2317.67	2717.4	1445.44	1259.64	3011.31	1079.65	1069.84	2296.21	4769.2	2689.02	847.561	6936.49	2516.73	1184.65	960.304
IGFBP3	0.183752	0.594529	0.309071	0.757268	0.867677	false	1489.7	2152.12	3420.72	1960.42	1408.39	3810.93	2159.07	2692.38	16981.8	5069.16	22119.2	1321.68	12298.1	7712.27	2143.8	7219.82	3072.72	10129.5	1822.92	2747.62	9123.92	16159.3	4262.94	3802.87
IKBKB	-0.393957	0.181365	-2.17218	0.0298421	0.123291	false	828.984	415.956	224.054	745.494	338.246	468.524	418.171	334.339	225.742	355.159	288.238	259.532	203.247	228	432.892	315.729	423.55	434.841	689.8	267.065	707.597	211.214	214.727	162.98
IKBKG	0.110691	0.275999	0.401056	0.688379	0.83227	false	504.8	507.772	242.93	552.131	376.153	675.489	391.479	717.45	349.102	657.084	355.895	451.642	448.291	322.606	332.676	261.129	323.611	400.12	776.239	276.338	1374.37	583.888	194.47	263.644
IL10	-0.089622	0.315583	-0.283989	0.776419	0.874317	false	16.9811	52.8639	19.6971	26.7912	38.8788	25.2595	26.6918	46.6519	21.8189	58.0013	19.463	48.0273	38.5186	17.0291	26.862	22.9477	27.7607	47.1216	41.9358	27.8193	78.2439	31.9167	26.7396	15.1795
IL11	-0.201813	0.709726	-0.284354	0.776139	0.874317	false	66.3805	338.051	59.0912	34.945	251.74	223.262	44.4863	139.956	209.797	48.4669	134.387	52.6454	352.404	137.179	13.431	9.4956	469.553	298.437	47.9266	17.6189	302.77	483.445	42.9454	76.6965
IL11RA	0.165976	0.30748	0.539794	0.589339	0.766352	false	69.468	65.3843	27.9042	50.0878	39.8508	35.0374	44.4863	40.9971	36.9243	46.0833	41.7064	26.7845	25.4059	33.1121	72.3209	26.1129	24.5881	57.8686	34.2333	32.4558	115.665	27.2231	118.303	18.3752
IL12A	0.258488	0.363981	0.71017	0.477598	0.669193	false	64.8368	13.9116	9.84853	18.6373	12.6356	14.6668	56.3493	12.7232	16.7838	12.7126	21.3166	13.854	30.3232	15.1369	39.2599	35.6085	9.51797	8.26695	17.9725	10.2004	34.0191	19.7133	16.2058	19.973
IL12RB2	-1.00354	0.543588	-1.84615	0.0648708	0.206615	false	114.236	292.143	86.9954	111.824	116.636	45.6301	115.664	55.1341	326.444	63.5631	186.289	114.527	263.893	31.22	63.0225	115.53	619.461	365.399	142.068	102.931	285.76	76.9756	32.4116	370.7
IL13RA2	-0.239779	0.603346	-0.397415	0.691061	0.834119	false	7.71866	9.73809	15.5935	13.978	31.1031	154.816	14.8288	23.326	16.7838	16.6853	9.26809	13.854	9.83454	19.8672	16.5305	10.2869	106.284	14.0538	17.1166	10.2004	23.8134	15.0196	20.2573	17.5763
IL15	-1.11381	0.500044	-2.22742	0.0259191	0.111545	false	146.655	29.2143	13.9521	16.3077	100.113	19.5558	71.178	30.3944	57.0648	25.4252	19.463	21.2429	81.9545	75.6847	67.1551	117.904	37.2787	28.9343	111.258	224.409	27.2153	30.0393	25.119	21.5709
IL19	-0.257395	0.528047	-0.487446	0.625942	0.792568	false	15.4373	29.2143	9.84853	16.3077	20.4114	26.8892	127.527	29.6876	13.427	79.4539	52.8281	64.6522	21.3082	22.7054	71.2877	11.0782	75.3506	94.2432	29.9541	10.2004	30.6172	27.2231	27.5499	13.5817
IL1A	1.18593	0.751494	1.5781	0.114542	0.288975	false	46.312	624.629	136.238	20.967	106.917	1377.87	957.937	236.794	1085.91	268.554	225.215	146.853	495.825	374.639	71.2877	7.913	123.734	144.672	480.122	145.588	78.2439	265.66	34.8425	805.313
IL1B	0.271514	0.583607	0.465234	0.641764	0.805465	false	29.3309	332.486	138.7	47.7582	94.2811	142.594	305.472	1352.2	517.779	299.541	511.599	184.721	130.308	223.27	77.4866	66.4692	315.679	126.484	450.167	267.992	142.88	161.461	345.994	242.872
IL1R1	1.2119	0.340615	3.55798	0.000373717	0.00659019	true	251.628	367.265	167.425	257.428	505.425	215.113	192.774	501.861	553.025	732.565	391.113	536.613	252.42	551.552	763.502	222.355	236.363	157.072	166.031	194.735	159.89	172.726	863.77	468.168
IL1R2	1.43413	0.681395	2.1047	0.0353175	0.135822	false	398.283	388.133	51.7048	3567.89	230.357	157.261	459.691	694.124	62.0999	224.06	223.361	350.969	69.6613	193.942	640.556	28.4868	79.3164	455.509	39.3683	61.2024	200.713	166.155	361.39	345.933
IL1RAP	-0.0245428	0.312781	-0.0784664	0.937457	0.973824	false	470.838	966.853	975.825	177.055	1159.56	1184.75	833.376	765.515	1273.89	1349.92	1042.66	1013.19	810.53	638.59	411.196	1259.75	1200.85	942.432	526.337	896.708	326.583	1197.82	267.396	801.319
IL20RA	-0.699161	0.645516	-1.0831	0.278763	0.481015	false	52.4869	36.1701	100.947	96.6812	43.7387	27.704	77.1095	351.303	10.0703	163.675	25.9507	93.2839	10.6541	12.2988	147.741	177.251	115.009	49.6017	50.4941	371.851	27.2153	66.6496	119.113	28.7612
IL20RB	-0.291036	0.517793	-0.562071	0.574068	0.760167	false	875.296	1718.08	2781.39	187.538	1974.07	5139.91	1420.59	683.521	910.519	1879.08	1342.95	858.951	2997.89	3025.5	1110.64	832.447	3798.46	1552.53	1495.14	4964.82	445.65	1348.01	98.8555	1638.59
IL22RA1	0.0140976	0.450563	0.0312888	0.975039	0.994113	false	146.655	222.585	674.624	48.923	173.011	376.448	284.712	168.936	135.109	331.323	232.629	374.983	78.6763	78.5229	70.2545	134.521	360.89	317.451	221.66	149.297	122.469	344.513	126.405	351.526
IL22RA2	0.65981	0.388621	1.69783	0.0895408	0.26104	false	41.6808	41.7347	15.5935	51.2527	105.945	35.8522	115.664	63.6162	46.1554	146.195	47.2673	36.0205	100.804	43.5187	117.78	26.9042	31.7266	62.8288	39.3683	43.5836	85.0477	41.304	55.0998	30.359
IL23A	0.511455	0.339543	1.5063	0.131989	0.311857	false	21.6123	37.5612	50.8841	54.7472	19.4394	83.112	50.4178	108.148	40.281	69.9194	38.926	45.2565	34.4209	23.6515	35.1273	26.1129	31.7266	56.2152	20.54	32.4558	51.0286	44.1202	33.2219	33.5547
IL23R	-0.052482	0.357171	-0.146938	0.883181	0.941799	false	24.6997	11.1292	11.49	34.945	17.4955	13.0372	74.1438	54.4272	21.8189	21.4526	34.2919	31.4025	37.6991	40.6805	44.4257	19.7825	19.0359	31.4144	35.0891	42.6562	108.861	37.5491	31.6014	16.7774
IL24	0.827068	0.690022	1.19861	0.23068	0.427857	false	20.0685	105.728	57.4498	19.8022	764.941	145.039	74.1438	318.788	346.585	82.632	546.817	87.7423	37.6991	86.0914	10.3316	14.2434	291.091	150.458	53.0616	26.892	136.076	198.071	189.608	224.497
IL2RA	0.966759	0.408158	2.36859	0.0178559	0.0838302	false	100.343	211.456	31.187	108.33	138.992	49.7042	53.3835	195.09	76.3661	116.003	77.852	64.6522	172.104	88.9296	291.35	34.0259	33.3129	71.0957	117.249	44.5109	68.0382	76.9756	64.8233	74.2997
IL2RB	-0.0827838	0.471689	-0.175505	0.860683	0.926003	false	95.7114	147.463	31.187	73.3845	68.0379	22.8151	86.0068	224.777	40.281	92.9611	129.753	42.4857	122.932	37.8424	168.404	53.8084	26.1744	76.0559	134.366	202.153	34.0191	73.2207	82.6497	44.7396
IL3	0.29532	0.211279	1.39777	0.162181	0.359685	false	21.6123	27.8231	30.3663	31.4505	14.5796	25.2595	62.2808	28.2739	24.3365	21.4526	20.3898	26.7845	27.045	33.1121	23.7626	18.9912	22.2086	14.8805	25.675	24.1101	44.2248	24.4069	34.0322	27.9623
IL3RA	0.643314	0.258523	2.48842	0.0128313	0.0692315	false	49.3994	36.1701	36.1113	52.4175	40.8228	46.4449	83.041	71.3916	33.5675	35.7543	42.6332	71.1174	50.8118	64.332	107.448	27.6955	37.2787	35.5479	27.3866	36.1651	115.665	40.3653	51.8586	58.3213
IL6	-0.381591	0.61274	-0.62276	0.533442	0.728905	false	23.156	172.503	44.3184	209.67	63.1781	67.6304	29.6575	302.531	335.675	177.977	106.583	150.547	124.571	147.585	185.968	18.1999	636.911	90.1097	177.157	45.4382	357.201	521.932	103.717	89.4793
IL6R	0.0555758	0.333684	0.166552	0.867723	0.930806	false	202.229	183.633	104.23	62.901	91.3652	160.52	77.1095	91.8901	58.7432	57.2068	132.534	57.2634	81.9545	163.668	224.195	80.7126	111.043	172.779	82.1598	48.2201	302.77	107.954	49.4278	58.3213
IL7	-0.601505	0.3943	-1.5255	0.127134	0.308018	false	18.5248	15.3027	9.84853	16.3077	62.2061	17.1113	23.726	26.8602	13.427	19.8635	19.463	16.6248	17.2104	21.7594	55.7904	49.8519	14.277	17.3606	40.2241	60.2751	17.0095	27.2231	38.0837	13.5817
IL7R	1.79728	0.510435	3.52108	0.000429793	0.00715865	true	154.373	388.133	63.1947	212	346.022	140.964	174.979	619.198	2678.69	548.232	623.743	529.224	1243.25	247.867	928.806	81.5039	366.442	218.247	104.411	154.861	197.311	646.783	415.679	503.321
IL8	0.0115187	0.611592	0.018834	0.984974	0.995457	false	548.025	6507.83	1811.31	218.989	3065.6	1468.31	3698.29	15872.3	7743.19	7957.31	6534	2433.69	2985.6	4800.3	3724.52	666.274	8448.79	2275.06	4354.47	8540.52	8283.65	3579.37	3297.07	12372.1
INHBA	1.00595	0.58049	1.73293	0.0831081	0.246259	false	2053.16	3452.85	2118.26	354.109	2401.74	1738.83	1245.62	373.215	6591.82	936.761	1909.23	895.895	2502.89	3367.97	299.615	323.642	2404.87	964.753	890.065	287.466	6933.09	1799.54	990.986	1803.97
INHBB	1.72959	0.670749	2.57859	0.00992042	0.0583127	true	125.042	18.085	77.1468	773.45	686.211	88.8158	53.3835	60.082	277.771	275.705	77.852	103.444	57.3681	368.963	79.5529	16.6173	135.631	53.7352	86.439	35.2378	71.4401	76.0369	436.747	86.2836
IRAK2	0.296461	0.396651	0.747412	0.454815	0.647399	false	108.061	218.411	139.521	60.5714	135.104	588.303	234.294	368.267	183.782	337.679	179.801	367.594	140.962	279.087	257.256	343.424	236.363	90.1097	198.553	137.242	149.684	94.8115	111.01	296.4
IRAK3	0.344763	0.381451	0.903819	0.366091	0.561962	false	58.6618	43.1258	38.5734	40.7692	100.113	32.5929	32.6233	91.8901	73.8486	80.2484	53.7549	106.214	49.9922	175.021	189.067	64.0953	41.2445	44.6415	71.8899	93.6583	47.6267	40.3653	73.7365	74.2997
IRS1	1.40629	0.422308	3.33	0.000868453	0.0110156	true	196.054	360.309	187.122	81.5384	143.852	1073.94	201.671	152.679	494.282	436.996	639.498	453.489	835.116	394.507	301.681	159.843	343.44	130.618	74.4574	209.572	68.0382	185.868	769.777	297.998
ITGA2	-0.248057	0.39332	-0.630674	0.528254	0.723348	false	575.812	1057.28	608.968	605.714	3106.42	2182.91	880.828	894.868	1549.98	947.885	1638.6	511.676	3401.11	597.909	362.637	1046.89	856.617	1521.12	2042.87	2091.08	316.378	1080.48	983.693	906.776
ITGA3	0.512333	0.44331	1.1557	0.247805	0.444573	false	3396.21	4457.26	4721.55	1643.58	7614.42	6518.59	4614.71	1180.43	10941.3	3674.74	3689.63	3698.11	11068	3980.07	418.428	4640.18	3416.95	5032.09	2405.74	2201.43	683.784	3753.97	1159.53	2834.58
ITGA6	0.226279	0.525926	0.430249	0.667014	0.820251	false	1241.16	9774.26	5996.94	2326.17	15788.7	16643.6	2209.48	8961.41	22009.4	21918.9	8084.56	10779.4	36847.6	5983.82	2732.7	3192.89	17969.1	9676.46	2683.89	26455.2	3616.23	20789.1	1927.68	33883.1
ITGA7	0.758056	0.346876	2.18538	0.0288611	0.119923	false	21.6123	43.1258	29.5456	27.956	54.4304	46.4449	35.589	60.082	30.2108	35.7543	75.9984	56.3398	28.6841	53.9254	140.509	26.9042	36.4856	32.2411	19.6841	34.3105	57.8325	45.0589	86.7012	42.3429
ITGA8	0.383123	0.30848	1.24197	0.214249	0.422331	false	21.6123	31.9966	18.8764	29.1208	36.9349	35.8522	44.4863	62.2025	27.6932	36.5488	37.9992	45.2565	40.9772	31.22	111.581	22.9477	29.3471	36.3746	29.9541	34.3105	81.6458	42.2427	55.0998	43.1418
ITGA9	0.395823	0.250276	1.58154	0.113754	0.288975	false	60.2056	33.3877	34.4699	83.868	51.5144	31.7781	53.3835	60.082	27.6932	50.8505	36.1456	48.9509	57.3681	45.4108	65.0888	22.9477	31.7266	47.9483	34.2333	46.3655	54.4306	37.5491	72.1159	71.903
ITGB3	0.9222	0.327771	2.81355	0.00489981	0.0350749	false	50.9432	59.8197	58.2705	46.5933	131.216	39.9264	35.589	71.3916	153.571	72.303	78.7788	54.4926	90.1499	183.535	99.1829	28.4868	75.3506	35.5479	35.9449	67.6936	27.2153	37.5491	57.5307	116.643
ITGB4	0.0867037	0.396917	0.218443	0.827084	0.900575	false	3885.57	5920.76	12069.4	4605.75	7663.02	11984.4	7337.27	3145.47	10040	4102.2	8594.3	5521.3	16179.5	6615.79	2407.25	12854.7	7891.19	5042.84	5742.63	3683.27	5215.13	8181.95	1546.04	3281.17
ITGB6	-0.503543	0.521517	-0.965534	0.334277	0.53337	false	1316.8	3315.12	880.623	123.472	6311.01	2269.28	1904.01	1203.76	7632.42	1565.24	1217.83	2620.26	2685.65	4997.08	1627.22	8451.87	1545.88	1788.97	4051.51	3403.23	564.717	829.835	1910.67	1382.13
ITGB7	-0.443237	0.344696	-1.28588	0.198486	0.406601	false	109.605	44.517	54.1669	60.5714	61.2341	39.1115	41.5205	72.0984	38.6027	77.0703	53.7549	32.3261	53.2704	29.3278	139.476	69.6344	28.5539	104.164	120.672	76.9667	37.421	95.7502	37.2734	51.131
ITGB8	0.402398	0.345402	1.16501	0.244014	0.441055	false	3261.91	1459.32	5672.75	646.483	4735.44	4296.56	1675.65	3377.32	2706.38	2739.57	2369.85	3241.85	3417.5	4281.86	1224.29	4216.84	3527.99	2186.61	1513.97	1488.33	221.124	1291.69	2096.22	1516.35
JAG1	0.0642256	0.46433	0.138319	0.889988	0.947661	false	1602.39	3927.23	5376.48	1315.1	2692.36	2213.88	2233.21	1761.46	12060	4220.59	6168.84	4541.35	5622.08	4356.6	1267.68	2616.04	2867.29	1283.03	1458.34	12616	3782.92	2742.02	2332.02	4593
JAG2	0.00144628	0.410258	0.00352529	0.997187	0.998568	false	1549.91	1765.38	2742.82	639.494	1545.43	3289.44	1648.96	1101.97	1769.01	939.94	4335.61	928.221	2186.55	1499.5	433.925	1021.57	3199.62	3053.81	1180.19	803.977	717.803	1466.29	1835.31	634.344
JAK1	0.252185	0.249943	1.00897	0.312988	0.517721	false	1404.8	1519.14	1038.2	704.724	1461.84	1221.42	809.65	1235.57	1643.97	1169.56	1518.11	996.567	1389.95	3291.34	1371	849.856	1035.08	1192.92	1434.37	1298.23	1486.63	1199.69	1083.36	1328.61
JAK2	-0.567002	0.270492	-2.09619	0.0360655	0.137239	false	765.691	888.949	479.295	534.659	294.507	203.706	418.171	565.478	369.243	352.775	368.87	185.644	317.983	359.502	940.171	679.727	414.032	515.858	991.909	472.928	1408.39	300.393	578.548	261.247
JAK3	1.30277	0.458722	2.83999	0.00451149	0.0332837	true	402.914	322.748	155.935	196.857	60.2622	46.4449	26.6918	262.947	58.7432	98.5228	215.947	92.3603	92.6086	92.7138	354.372	30.8607	33.3129	107.47	82.1598	44.5109	193.909	105.137	122.354	45.5386
JUN	-0.972613	0.382287	-2.5442	0.0109529	0.0623539	false	296.397	1544.18	808.4	229.472	1124.57	1103.27	1171.47	535.083	1576	1058.33	1259.53	964.241	1042.46	1182.57	998.028	1652.23	4799.44	863.069	2503.31	1334.4	251.741	2662.23	612.58	1793.58
KAT2B	-0.409074	0.282718	-1.44694	0.147915	0.337212	false	290.222	274.058	104.23	138.615	177.871	296.596	344.027	223.364	152.732	207.375	299.359	193.033	288.48	373.693	382.267	424.928	190.359	180.219	472.419	350.523	255.143	189.623	354.908	301.194
KDM5C	0.0389935	0.253838	0.153615	0.877913	0.937564	false	1864.83	1637.39	1165.41	1056.5	981.69	677.118	1565.92	759.154	965.906	1541.41	1203.93	574.481	564.666	1221.36	869.917	674.187	525.075	1540.96	1290.59	981.094	1367.57	1405.27	812.722	563.24
KDM6A	-0.428659	0.380802	-1.12567	0.260304	0.460146	false	211.491	335.269	203.536	252.769	424.751	241.188	237.26	325.857	419.594	754.812	441.161	228.13	386.825	351.934	364.704	246.094	293.471	416.654	662.414	899.49	85.0477	316.351	1551.71	332.352
KIT	0.307602	0.375491	0.819199	0.412673	0.607019	false	95.7114	62.602	24.6213	46.5933	49.5705	33.4078	74.1438	42.4108	30.2108	40.5215	49.1209	52.6454	40.9772	65.2781	148.774	45.1041	26.1744	88.4563	21.3958	32.4558	54.4306	53.5075	135.319	43.1418
KITLG	-0.415705	0.422975	-0.982813	0.3257	0.529014	false	727.098	1005.81	777.213	246.945	543.332	600.525	121.596	777.532	1325.08	986.023	1197.44	495.975	1436.66	392.615	420.494	1157.67	657.533	1290.47	303.82	1990.93	506.885	671.19	2255.85	452.19
KLF4	-0.9032	0.554756	-1.6281	0.103503	0.280272	false	208.404	1421.76	2577.03	854.988	659.968	1350.16	1233.75	3150.42	908.002	3136.84	1302.17	4298.45	1309.63	857.13	660.186	1817.62	14650.5	739.065	1560.18	1114.63	619.148	4069.38	328.978	3444.95
KMT2C	-0.108064	0.264248	-0.408951	0.682575	0.829415	false	1688.84	1050.32	1035.74	1175.32	848.53	1284.98	1379.07	894.162	421.272	551.41	1100.12	930.068	399.938	734.142	1118.91	1058.76	1306.34	1044.94	867.813	393.179	1554.67	812.938	1098.75	456.184
KMT2D	-0.132952	0.143794	-0.9246	0.355174	0.553428	false	904.627	667.755	715.66	817.713	592.902	590.747	605.013	754.913	490.925	565.712	645.986	545.849	484.351	603.586	577.534	502.475	653.567	809.334	920.019	414.507	1047.79	530.381	444.04	341.939
KRAS	0.681909	0.468028	1.45698	0.145121	0.333627	false	336.534	733.139	837.946	942.35	9401.87	1293.12	352.924	1480.84	974.298	1080.57	790.568	1070.46	770.372	1454.09	558.937	896.543	923.243	841.575	943.127	1109.99	139.478	1120.84	963.436	810.906
LAMA1	1.97495	0.423748	4.66067	3.15e-06	0.000160892	true	279.416	38.9524	167.425	337.802	84.5614	308.003	109.733	49.4793	119.165	107.263	187.215	139.464	199.969	87.9835	53.7241	24.5303	58.6942	40.508	23.9633	38.947	105.459	125.789	64.8233	107.056
LAMA3	1.9844	0.637901	3.11082	0.00186566	0.018228	true	1620.92	3852.11	12269.6	711.713	8998.5	5811.32	6521.68	1264.55	6499.51	1324.5	4180.84	2828.07	25953.3	7695.25	219.029	1003.37	1586.33	3298.51	556.291	1481.84	500.081	4695.51	238.226	2713.14
LAMA5	-0.36892	0.401627	-0.918565	0.358323	0.553563	false	2327.95	460.473	471.909	765.296	178.843	959.862	892.691	202.158	336.514	144.606	189.069	181.026	128.669	419.104	178.736	383.78	532.213	633.248	424.493	128.896	2510.61	476.874	248.759	171.768
LAMB3	0.308522	0.541086	0.57019	0.568549	0.754934	false	1951.28	6663.64	12161.3	740.834	12191.4	7258.45	2909.4	2871.92	8417.06	3918.67	6816.68	2226.81	21812.2	5191.03	376.068	4855.42	8772.4	5928.23	3336.89	4794.19	823.262	10161.7	476.451	4551.46
LAMB4	0.000256712	0.603433	0.000425419	0.999661	0.999661	false	16.9811	22.2585	3.28284	17.4725	21.3834	12.2224	32.6233	8.48217	17.623	18.2744	18.5362	19.3957	17.2104	22.7054	15.4973	15.0347	49.1762	7.44025	12.8375	15.7643	20.4115	15.0196	597.995	19.973
LAMC2	1.05634	0.627433	1.6836	0.0922597	0.262613	false	4581.8	11123.7	18124.6	660.461	19067.1	19377.3	5498.5	6099.38	26155.8	11720.2	10754.7	6280.5	43498.2	12843.7	540.34	3821.98	13644.8	8891.93	2983.43	3555.31	11182.1	26134.2	1400.18	7883.76
LAMC3	0.0561153	0.239975	0.233838	0.81511	0.89563	false	40.137	33.3877	22.9799	54.7472	54.4304	48.8894	50.4178	45.2382	46.1554	51.645	40.7796	62.805	40.1577	55.8175	55.7904	27.6955	58.6942	49.6017	38.5124	38.947	166.694	44.1202	44.566	67.1094
LAT	0.505522	0.455312	1.11028	0.266879	0.4672	false	257.803	377.003	47.6012	281.89	101.085	105.112	136.425	331.511	93.1499	132.688	349.407	83.1242	97.5258	88.9296	376.068	35.6085	60.2805	250.489	169.455	98.2948	227.928	147.38	126.405	29.5601
LEF1	0.32468	0.418772	0.775314	0.438154	0.632493	false	151.286	83.4694	155.935	241.121	124.412	52.1487	29.6575	100.372	73.8486	105.674	116.778	88.6659	131.947	96.498	164.272	167.756	53.9352	65.3089	33.3774	174.334	34.0191	48.8138	212.296	96.6696
LEFTY1	0.0830581	0.20283	0.409496	0.682175	0.829415	false	38.5933	26.432	30.3663	48.923	31.1031	30.9633	88.9725	32.515	36.0851	38.9324	28.7311	42.4857	34.4209	46.3569	49.5914	35.6085	37.2787	38.028	29.0983	29.6739	105.459	38.4878	27.5499	39.1472
LEP	-1.92664	0.48226	-3.99501	6.47e-05	0.00167043	true	21.6123	27.8231	11.49	15.1428	15.5515	11.4075	20.7603	12.0164	20.9797	12.7126	10.1949	19.3957	13.9323	14.1909	16.5305	210.486	10.3111	36.3746	21.3958	23.1827	34.0191	19.7133	14.5852	81.49
LEPR	0.362948	0.386249	0.939673	0.347385	0.545999	false	206.86	50.0816	228.158	95.5164	214.806	598.08	326.233	160.454	137.627	139.044	132.534	207.811	265.533	298.009	310.98	102.869	240.329	85.9763	232.786	253.156	85.0477	168.971	193.66	198.932
LFNG	0.990697	0.39688	2.49621	0.0125527	0.0687545	false	540.306	282.405	415.28	172.395	153.571	316.152	266.918	122.285	287.002	83.4266	352.187	140.388	219.638	290.44	150.841	83.8778	107.87	271.156	84.7273	69.5482	170.095	189.623	410.818	82.289
LIF	0.487758	0.399578	1.22068	0.222207	0.425931	false	111.149	155.809	87.8161	96.6812	309.087	110.001	38.5548	134.301	74.6878	54.0286	130.68	67.423	71.3004	73.7926	58.8898	24.5303	56.3147	65.3089	150.626	77.894	81.6458	100.444	77.788	42.3429
LIFR	0.859528	0.609231	1.41084	0.158292	0.354319	false	114.236	37.5612	91.9196	133.956	101.085	35.0374	32.6233	31.8081	399.454	115.208	58.389	48.0273	79.4958	67.1702	300.648	123.443	16.6564	28.9343	60.7641	85.3125	85.0477	37.5491	515.345	53.5278
LIG4	0.767742	0.294927	2.60316	0.00923685	0.0557669	false	257.803	300.49	200.253	192.198	771.745	326.744	133.459	345.648	324.766	432.229	225.215	470.114	281.104	332.067	325.444	163.008	141.976	169.472	251.615	303.23	71.4401	529.442	343.563	248.465
LTBP1	0.866107	0.417033	2.07683	0.037817	0.140214	false	813.547	1802.94	3419.9	269.077	3275.54	2313.28	1577.78	682.814	986.046	771.497	2368.92	2934.29	2257.03	2568.55	704.612	1277.16	3453.44	438.975	329.495	1154.5	231.33	1571.43	2404.94	1930.2
MAD2L2	0.205558	0.265204	0.775096	0.438283	0.632493	false	443.051	474.384	644.258	235.296	433.499	510.08	922.348	331.511	1151.37	510.889	545.891	491.357	653.177	371.801	485.583	454.997	460.035	385.24	450.167	665.808	605.54	592.337	412.438	800.52
MAML2	0.708983	0.328442	2.15863	0.0308792	0.125379	false	756.429	294.925	267.552	227.143	151.627	64.3711	355.89	148.438	234.973	188.306	293.799	253.067	322.901	255.436	247.957	205.738	176.082	104.99	100.132	176.189	503.483	621.438	654.715	469.766
MAP2K1	0.0124812	0.322014	0.0387599	0.969082	0.9915	false	248.541	482.731	601.581	287.714	1164.42	1588.09	895.657	807.926	1085.91	1142.55	601.499	510.752	433.539	466.407	477.318	727.996	757.472	765.519	755.699	847.561	173.497	1056.07	491.036	707.845
MAP2K2	-0.211414	0.174257	-1.21323	0.225042	0.425931	false	1137.73	1777.9	1662.76	1538.75	1603.75	1196.16	1856.56	1668.87	1604.53	1496.12	1372.6	1351.23	1930.85	1235.55	1588.99	1338.88	2113.78	1403.73	2134.44	1617.23	2690.91	1109.58	972.349	1418.09
MAP2K4	0.410131	0.267716	1.53196	0.125532	0.30662	false	121.955	333.877	504.737	316.835	438.359	318.596	192.774	288.394	526.171	388.53	716.423	388.837	1477.64	263.004	219.029	405.146	417.204	312.491	296.974	323.631	30.6172	570.746	352.477	415.439
MAP2K6	-0.841353	0.464303	-1.81208	0.0699739	0.220922	false	75.6429	36.1701	55.8083	92.0219	111.777	138.52	38.5548	99.6654	24.3365	58.0013	52.8281	28.6317	35.2404	44.4648	128.111	320.476	26.9676	42.1614	96.709	127.969	23.8134	38.4878	63.2027	36.7504
MAP3K1	-0.756897	0.26048	-2.90578	0.00366334	0.0287891	false	330.359	313.01	429.232	304.022	860.194	892.232	691.02	702.606	342.389	474.34	579.256	430.399	373.712	352.88	434.958	988.334	754.299	572.073	1068.93	990.367	258.545	573.562	604.477	373.097
MAP3K12	0.846204	0.339448	2.49289	0.0126709	0.0688803	false	569.637	136.333	54.1669	236.461	86.5054	132.001	38.5548	77.0463	95.6675	81.8375	131.607	68.3466	70.4809	128.664	179.769	50.6432	35.6924	76.8826	49.6382	69.5482	353.799	54.4462	105.338	43.9407
MAP3K13	-0.297915	0.357921	-0.832348	0.405213	0.601579	false	694.68	228.15	100.947	131.626	79.7016	146.668	77.1095	161.161	167.838	227.238	151.997	106.214	132.766	109.743	125.012	185.955	234.777	120.697	71.034	200.299	469.464	116.402	93.1835	73.5008
MAP3K14	-0.122731	0.234045	-0.52439	0.600007	0.771895	false	932.414	573.156	209.281	527.67	169.123	211.039	667.294	277.084	351.62	225.649	367.943	214.276	149.977	207.187	414.295	342.633	182.428	535.698	350.891	141.878	1704.36	216.846	150.714	157.388
MAP3K5	-0.597392	0.282049	-2.11805	0.0341712	0.132835	false	350.427	189.197	84.5332	194.527	184.674	100.223	192.774	195.797	184.621	214.526	160.338	147.776	125.39	134.34	227.294	476.363	226.052	181.046	223.372	209.572	71.4401	85.4242	128.026	181.355
MAP3K8	-0.153518	0.360144	-0.426269	0.669912	0.822319	false	174.442	140.507	92.7403	177.055	138.992	237.928	278.781	475.708	151.054	232.005	274.336	255.838	138.503	211.917	451.489	121.069	404.514	262.889	394.538	119.623	95.2535	190.562	306.29	252.459
MAPK1	0.319982	0.189325	1.69012	0.0910051	0.261245	false	1406.34	2132.64	1966.42	1786.85	1944.91	2486.84	1299	1800.34	1748.87	3059.77	2079.76	1874.91	3484.7	1487.2	1146.8	1514.55	1509.39	1417.78	1647.48	2290.45	847.076	1943.17	1530.64	1807.16
MAPK10	0.778366	0.672438	1.15753	0.247057	0.444333	false	273.241	27.8231	253.6	107.165	9.71971	44.8153	59.315	231.139	48.6729	276.5	56.5354	35.0969	18.03	95.552	49.5914	163.008	58.6942	53.7352	10.27	25.9647	23.8134	122.035	200.952	31.9569
MAPK12	1.35611	0.36746	3.6905	0.000223811	0.00475927	true	69.468	93.2075	145.266	71.0549	42.7667	63.5562	44.4863	106.027	96.5066	61.974	68.5839	58.187	90.1499	22.7054	49.5914	23.739	26.9676	54.5619	13.6933	18.5462	115.665	45.0589	25.9293	33.5547
MAPK3	0.0820912	0.293946	0.279273	0.780035	0.874317	false	728.642	605.153	657.39	397.208	786.324	1826.02	1604.47	891.334	626.874	692.838	912.907	1007.65	535.982	679.27	784.165	867.265	865.342	826.695	860.111	768.74	272.153	755.676	540.464	1178.41
MAPK8	0.392738	0.293278	1.33913	0.180528	0.383264	false	128.13	279.622	298.739	263.252	509.313	448.153	391.479	361.199	1302.42	469.573	384.626	541.231	579.418	383.154	297.549	391.693	229.224	261.236	310.667	569.368	272.153	372.675	461.056	409.048
MAPK8IP1	0.278282	0.3122	0.891357	0.372737	0.567346	false	103.43	86.2517	77.9675	57.0769	63.1781	159.705	148.288	50.893	88.1148	60.385	49.1209	101.596	59.8268	61.4938	63.0225	52.2258	70.5916	57.8686	87.2948	54.7113	102.057	126.728	22.6882	89.4793
MAPK8IP2	-0.215732	0.46517	-0.46377	0.642812	0.805465	false	126.586	30.6054	78.7883	74.5494	44.7106	72.5193	225.397	26.1533	13.427	106.468	13.9021	44.3329	12.2932	19.8672	46.492	81.5039	24.5881	25.6275	139.501	22.2554	115.665	22.5295	42.9454	11.9838
MAPK9	-0.657536	0.304823	-2.1571	0.0309975	0.125379	false	138.936	257.364	363.575	285.384	814.511	408.227	269.883	641.11	690.652	577.63	376.285	469.19	553.193	581.826	550.672	485.858	495.728	376.146	1252.08	1166.56	78.2439	738.778	446.47	417.836
MAPT	0.161033	0.346911	0.46419	0.642511	0.805465	false	71.0117	8.34694	22.1592	20.967	23.3273	7.33341	41.5205	18.378	13.427	18.2744	19.463	14.7776	19.6691	13.2448	36.1604	21.3651	8.72481	26.4542	15.405	17.6189	27.2153	37.5491	20.2573	14.3806
MCM2	-1.78086	0.328068	-5.42832	5.69e-08	8.23e-06	true	285.59	555.071	763.261	512.527	286.731	887.343	412.239	364.733	305.465	351.981	408.723	336.191	306.51	281.926	201.465	981.212	2901.39	1452.5	1130.55	904.127	346.995	353.9	187.988	615.969
MCM4	-1.05377	0.266088	-3.96023	7.49e-05	0.00186675	true	304.115	1438.46	1686.56	1297.62	1182.89	1839.06	1002.42	1187.5	1527.32	1487.38	1937.03	1700.35	1231.78	1350.97	723.209	2366.78	4603.53	2393.28	2616.28	3328.11	636.157	2758.92	752.761	3145.36
MCM5	-1.25658	0.263123	-4.77564	1.79e-06	0.000107932	true	237.735	602.371	499.813	620.856	332.414	426.968	296.575	601.527	370.082	556.177	466.185	314.949	594.17	213.809	274.819	1186.16	935.934	963.926	908.893	1199.01	602.138	611.112	270.637	875.618
MCM7	-1.04308	0.241352	-4.32181	1.55e-05	0.000571619	true	1877.18	2068.65	2563.9	4383.27	2441.59	2631.88	2850.09	1779.13	2266.65	1526.31	2424.53	1850.9	1399.78	2979.14	1129.24	4070.45	5086.56	4067.34	4785.81	3916.96	6011.17	3068.7	1473.11	2385.58
MDC1	-0.546075	0.204889	-2.66523	0.00769364	0.0483696	false	333.446	339.442	306.946	365.758	368.377	510.894	225.397	174.591	434.699	398.064	503.257	295.553	446.652	341.527	276.886	583.188	598.046	483.616	488.68	463.655	438.846	259.089	339.512	494.533
MDM2	-0.378871	0.389163	-0.973554	0.330278	0.53161	false	1435.67	1282.65	1075.13	2085.05	1302.44	911.788	1082.5	7604.97	1139.62	1376.14	1390.21	1776.09	1489.11	1572.35	2748.19	3188.15	2422.32	1497.14	3270.13	2461.08	625.951	1172.47	1698.37	2146.7
MECOM	-0.385214	0.370521	-1.03966	0.2985	0.500732	false	138.936	57.0374	164.963	167.736	56.3743	175.187	174.979	160.454	190.496	92.1665	99.1686	75.7354	205.706	176.913	213.863	297.529	71.3848	47.9483	227.651	260.574	105.459	58.2011	72.1159	41.5439
MED12	-0.294591	0.241575	-1.21946	0.22267	0.425931	false	318.009	260.146	368.499	619.692	406.284	508.45	296.575	389.473	454.001	392.502	435.6	441.482	599.087	533.577	394.665	644.118	334.715	361.266	794.212	571.223	136.076	284.434	608.529	337.145
MEN1	0.430163	0.341638	1.25912	0.207987	0.415399	false	1537.56	3130.1	1028.35	736.175	667.744	1269.5	800.753	767.636	683.099	594.315	1206.71	764.743	540.08	1000.93	550.672	815.039	583.769	1027.58	660.702	620.37	248.339	728.452	510.483	567.235
MET	0.256209	0.416272	0.615485	0.538235	0.731473	false	588.162	1533.05	1139.15	1248.7	888.381	1825.2	1124.02	544.979	920.589	1018.6	1975.03	765.667	2824.97	2119.17	270.687	484.276	1502.25	2113.86	849.841	343.105	1265.51	1450.33	1068.77	808.509
MFNG	0.86095	0.408599	2.10708	0.0351108	0.135749	false	185.248	127.986	47.6012	65.2307	99.141	27.704	32.6233	119.457	84.758	66.7413	67.6571	62.805	73.759	53.9254	285.151	30.0694	22.2086	75.2292	61.6199	52.8566	81.6458	67.5884	93.9938	44.7396
MGMT	0.134663	0.410364	0.328155	0.742794	0.865025	false	449.226	798.524	609.788	441.472	538.472	965.566	566.458	860.233	100.703	433.818	375.358	667.765	116.375	1221.36	418.428	541.249	391.03	669.623	350.891	769.667	387.818	1477.56	467.538	943.527
MLF1	-0.783702	0.491658	-1.594	0.110937	0.288975	false	348.883	496.643	877.34	20.967	586.098	761.86	216.5	264.361	1023.81	233.594	351.261	1048.29	440.915	758.739	82.6524	1496.35	1845.69	286.036	304.676	1445.68	146.282	423.366	481.313	1295.85
MLH1	-0.374931	0.155866	-2.40547	0.0161517	0.0789032	false	330.359	386.741	397.224	283.055	212.862	340.596	293.609	277.084	358.333	283.65	301.213	360.205	286.021	260.166	412.229	545.997	387.064	336.465	472.419	323.631	350.397	321.983	429.454	418.635
MLLT3	-0.166721	0.507619	-0.328438	0.74258	0.865025	false	128.13	179.459	315.153	167.736	48.5985	42.3708	56.3493	69.271	83.9188	42.9051	52.8281	55.4162	77.8568	258.274	75.4203	98.1212	114.216	115.737	63.3315	251.301	85.0477	58.2011	372.734	59.1202
MLLT4	-0.298282	0.223699	-1.33341	0.182397	0.384469	false	1048.19	1126.84	754.233	1013.41	1129.43	965.566	1417.63	1149.33	875.273	1183.86	891.59	1370.63	452.389	711.436	510.379	856.978	934.348	1369.83	1803.24	824.378	1285.92	961.257	645.802	786.938
MMP3	-0.00555954	0.620137	-0.00896502	0.992847	0.995913	false	226.929	1093.45	75.5054	319.164	1025.43	567.932	1364.25	1104.8	916.394	1776.59	479.16	193.957	887.567	637.644	407.063	10.2869	2093.16	618.368	825.022	664.881	224.526	284.434	502.381	1628.2
MMP7	1.89971	0.663466	2.86331	0.00419241	0.0321807	true	146.655	208.673	99.306	695.406	737.726	120.594	3555.93	277.084	793.872	1598.61	1475.48	764.743	676.124	452.216	419.461	306.233	68.2121	96.7233	52.2057	612.952	105.459	166.155	730.072	215.709
MMP9	0.60649	0.36798	1.64816	0.0993194	0.27638	false	4870.48	2103.43	880.623	1337.23	1014.74	1786.09	765.164	2664.81	1484.52	1635.96	967.589	1431.58	837.575	2978.19	1739.83	482.693	582.183	2607.4	503.229	709.392	4612.99	880.526	644.992	576.822
MNAT1	0.275656	0.257079	1.07226	0.283602	0.486974	false	222.297	392.306	555.621	549.801	474.322	668.97	160.151	380.284	699.883	346.419	564.427	584.641	853.966	319.768	175.636	537.293	586.942	281.903	290.127	612.952	27.2153	487.2	283.602	576.822
MPO	0.378131	0.263224	1.43654	0.15085	0.339764	false	30.8746	16.6939	27.0835	31.4505	19.4394	21.1854	71.178	24.7396	44.477	30.1925	19.463	36.0205	31.1427	41.6266	27.8952	15.826	13.4838	27.2809	35.9449	21.3281	68.0382	27.2231	22.6882	30.359
MSH2	-0.723488	0.261838	-2.76311	0.00572541	0.0390516	false	189.879	335.269	668.879	746.658	485.013	715.415	195.74	511.757	445.609	335.295	314.188	656.682	458.126	228.946	294.449	647.283	912.139	877.95	675.251	775.231	207.517	578.256	546.947	627.953
MSH6	-0.811747	0.252299	-3.2174	0.00129357	0.0143885	false	172.898	379.786	800.193	789.757	469.462	684.452	192.774	696.244	516.94	574.452	503.257	557.856	767.913	345.312	334.742	913.951	1324.58	907.711	871.237	1268.56	61.2344	840.161	696.85	854.846
MTOR	-0.172742	0.21181	-0.815555	0.414755	0.607019	false	487.819	439.605	485.861	253.934	379.069	468.524	367.753	248.81	573.166	401.242	481.941	411.927	493.366	308.415	318.212	417.806	446.551	456.335	629.036	320.849	700.793	511.606	255.242	417.836
MUTYH	-0.367726	0.224249	-1.63981	0.101045	0.278838	false	92.6239	94.5986	51.7048	48.923	55.4023	88.0009	59.315	55.8409	57.0648	65.1522	77.852	56.3398	57.3681	56.7635	53.7241	83.8778	106.284	83.4962	82.1598	44.5109	115.665	127.667	59.1513	49.5332
MYB	-0.978357	0.397909	-2.45874	0.0139424	0.071492	false	58.6618	38.9524	19.6971	66.3955	36.9349	19.5558	44.4863	44.5314	17.623	20.658	50.9745	34.1733	38.5186	17.0291	108.481	90.2082	47.5899	44.6415	147.203	53.784	27.2153	20.652	72.9262	19.973
MYC	0.186431	0.430185	0.433374	0.664743	0.820251	false	1222.64	2010.22	3451.09	1167.16	1538.63	3706.63	3828.78	1168.42	1246.19	1451.62	1592.26	3578.04	3341.28	2700.05	1021.79	2849.47	1226.23	934.165	3565.4	1045.08	3010.69	1549.84	320.065	3061.47
MYCN	-0.33357	0.631222	-0.52845	0.597187	0.771895	false	23.156	22.2585	16.4142	33.7802	12.6356	14.6668	38.5548	39.5834	17.623	57.2068	20.3898	21.2429	13.1127	17.9751	29.9615	52.2258	16.6564	14.8805	33.3774	49.1474	30.6172	19.7133	916.439	11.9838
MYD88	-0.10917	0.358598	-0.304435	0.760796	0.868966	false	284.047	600.979	1106.32	509.032	923.372	1216.53	972.766	1352.2	508.548	1167.97	631.157	749.965	602.365	396.399	927.773	1588.14	763.024	672.103	1114.29	560.095	40.8229	819.509	679.024	972.288
NASP	-0.797842	0.327594	-2.43546	0.014873	0.0741599	false	61.7493	104.337	119.824	102.505	106.917	157.261	26.6918	122.285	131.753	166.059	285.457	160.707	69.6613	70.9544	137.41	87.043	312.507	285.21	134.366	391.325	40.8229	86.3629	197.711	158.985
NBN	-0.123474	0.150332	-0.821341	0.411452	0.607019	false	1045.11	1164.4	1179.36	1113.58	1251.9	843.342	1287.14	1553.65	1341.02	1198.16	1093.63	1200.68	1849.71	1026.47	1187.1	1072.21	1816.35	1234.26	1212.71	1406.73	1568.28	1596.78	1195.99	1376.54
NCOR1	0.0666462	0.264135	0.252319	0.800795	0.886638	false	1551.45	1453.76	1559.35	1754.24	1314.1	1281.72	1043.94	976.863	1519.77	1638.34	1961.13	926.374	4357.52	1451.25	1372.03	1733.74	1273.03	1483.09	1881.97	1391.89	1313.14	1161.21	1721.06	1088.13
NF1	-0.36426	0.28705	-1.26897	0.20445	0.414054	false	1008.06	964.071	993.06	1841.6	1367.56	1174.16	433	794.496	1314.17	1200.55	683.058	1133.26	759.718	874.159	612.661	1586.56	885.171	1308.66	1405.28	1588.48	432.043	982.848	2120.53	800.52
NF2	0.504251	0.246956	2.04186	0.0411653	0.149601	false	524.869	1186.66	816.607	570.769	711.482	541.043	753.301	1212.24	927.303	1189.42	991.686	641.904	1530.91	685.893	637.457	610.092	511.591	611.754	598.226	676.009	1384.58	659.925	639.32	614.371
NFATC1	-0.115603	0.319651	-0.361654	0.71761	0.847765	false	192.967	95.9898	95.2025	125.802	128.3	63.5562	50.4178	54.4272	57.0648	75.4812	50.9745	62.805	38.5186	93.6599	112.614	36.3998	137.217	92.5898	81.304	76.9667	122.469	139.87	62.3924	62.3159
NFE2L2	0.593665	0.420345	1.41233	0.157853	0.354319	false	1071.35	2013	3741.62	2940.04	2072.24	2142.99	1512.53	12835.6	2328.75	7851.63	2235.46	5117.68	1931.67	1477.74	1556.96	3627.32	2333.49	2317.23	1815.22	2730.93	309.574	2767.37	2470.58	4960.51
NFKB1	-0.384901	0.206035	-1.86813	0.0617434	0.198402	false	95.7114	372.83	421.845	164.242	674.548	554.895	148.288	595.872	402.81	405.215	491.209	411.003	526.148	496.681	419.461	534.919	744.781	505.937	495.527	813.251	40.8229	665.558	438.368	603.985
NFKBIA	-0.563529	0.295542	-1.90677	0.0565508	0.188609	false	2420.57	7154.72	5036.7	4517.22	5145.61	8901.95	4193.57	8429.15	3595.08	5058.83	7497.89	6648.09	6105.61	7717	6571.9	5937.12	9678.98	5504.96	18364.4	4506.72	3531.18	4114.44	4253.22	5630.8
NFKBIZ	-0.673333	0.465342	-1.44696	0.147907	0.337212	false	963.289	3384.68	431.694	895.757	1636.8	2094.1	1984.09	2104.28	1143.81	1345.95	2318.88	1680.03	832.657	869.428	1148.87	614.049	2213.72	1895.61	7444.88	364.433	7361.73	632.702	619.062	1008.24
NGF	2.15564	0.724522	2.97526	0.00292745	0.024611	true	15.4373	250.408	282.325	107.165	14.5796	45.6301	56.3493	82.7011	265.183	58.0013	71.3643	103.444	63.9245	20.8133	24.7957	7.913	49.1762	56.2152	0.855832	0.92731	95.2535	142.687	25.9293	129.425
NGFR	-0.629041	0.594567	-1.05798	0.290064	0.490563	false	362.777	756.789	201.895	260.923	46.6546	1240.98	723.643	222.657	105.738	375.817	542.183	158.86	204.886	132.448	579.6	112.365	932.761	1335.11	79.5924	329.195	217.722	381.123	74.5468	226.894
NKD1	0.177368	0.348421	0.509063	0.610708	0.782322	false	106.518	98.7721	39.3941	32.6153	126.356	76.5934	83.041	78.46	99.8634	142.222	165.899	102.52	93.4281	128.664	68.1882	30.0694	139.597	141.365	35.9449	89.949	98.6554	75.0982	107.769	86.2836
NODAL	-0.117367	0.365195	-0.321383	0.74792	0.865194	false	27.7872	22.2585	13.1314	33.7802	63.1781	26.0744	62.2808	19.7917	39.4418	25.4252	25.0238	34.1733	23.7668	27.4357	30.9947	13.4521	22.2086	21.4941	30.8099	71.4028	71.4401	35.6716	11.3441	25.5655
NOS3	1.02223	0.3061	3.33952	0.000839241	0.010895	true	135.848	65.3843	62.374	122.308	45.6826	57.8525	29.6575	79.8737	42.7986	69.1249	59.3158	82.2006	40.9772	27.4357	66.1219	30.0694	35.6924	36.3746	11.9816	36.1651	74.842	48.8138	59.9615	54.3267
NOTCH1	-1.56456	0.32241	-4.85272	1.22e-06	8e-05	true	1086.79	983.547	1169.51	1407.12	629.837	322.67	682.123	596.579	648.692	617.357	703.448	506.134	310.607	489.113	539.307	1379.24	3623.17	1196.23	1772.43	951.42	3225.01	541.646	779.5	607.181
NOTCH2	0.0248439	0.294918	0.0842398	0.932866	0.971847	false	1230.35	1165.79	1868.76	533.494	1441.43	283.559	1162.57	1416.52	1047.31	1222	1196.51	1628.31	1169.49	2127.69	1231.52	1578.64	917.691	1129.27	1280.32	1564.37	469.464	918.075	1802.9	1249.51
NOTCH3	-0.215345	0.347322	-0.620015	0.535248	0.728905	false	2201.36	1023.89	4186.45	2186.39	2718.6	1314.31	1779.45	2338.25	1252.91	1875.11	1343.87	1707.74	383.547	1401.11	1572.46	2221.18	2156.61	958.139	2552.09	2855.19	847.076	1872.76	901.854	933.94
NPM1	-0.113058	0.253949	-0.4452	0.656175	0.815145	false	54.0306	51.4728	37.7527	92.0219	103.029	66.0007	166.082	61.4957	44.477	89.7829	52.8281	60.0342	71.3004	102.174	89.8845	68.8431	59.4873	63.6555	96.709	89.0217	159.89	66.6496	46.9969	74.2997
NR4A1	-1.04259	0.505624	-2.06199	0.0392083	0.143896	false	101.886	383.959	96.8439	131.626	151.627	378.893	56.3493	60.7889	159.446	72.303	118.632	84.0479	163.089	120.15	132.244	93.3734	533.8	205.847	574.263	65.839	258.545	323.861	71.3056	43.9407
NR4A3	0.104782	0.553727	0.18923	0.849912	0.918515	false	129.674	790.177	69.7604	38.4395	112.749	114.075	50.4178	167.523	99.8634	72.303	84.3396	78.5062	162.27	110.689	103.316	50.6432	193.532	186.006	119.816	42.6562	442.248	291.944	67.2542	34.3536
NRAS	-0.0188194	0.25262	-0.0744968	0.940615	0.975703	false	230.016	386.741	313.512	168.901	360.601	400.078	358.856	331.511	564.774	142.222	252.092	266.921	394.201	477.76	234.526	326.016	351.372	317.451	399.673	284.684	261.947	248.763	201.763	456.983
NSD1	-0.985956	0.335709	-2.93694	0.00331468	0.0269272	false	77.1866	276.84	351.264	370.417	427.667	367.485	124.562	418.453	323.927	313.843	314.188	351.893	362.239	728.466	392.599	504.849	456.069	359.612	1228.12	895.781	489.875	356.716	353.287	286.014
NTF3	1.51425	0.593898	2.54968	0.0107821	0.0621916	true	66.3805	12.5204	18.8764	180.549	33.047	17.1113	17.7945	224.071	20.9797	22.2471	25.0238	22.1665	34.4209	27.4357	38.2267	23.739	29.3471	16.5339	7.70249	11.1277	17.0095	52.5687	34.8425	30.359
NTHL1	-0.26054	0.221344	-1.17708	0.239163	0.43725	false	231.56	137.724	190.405	150.264	169.123	208.595	296.575	229.725	132.592	192.278	145.509	119.145	141.781	128.664	112.614	200.199	123.734	219.901	132.654	280.048	234.732	98.5664	124.785	88.6803
NTRK1	0.47953	0.341056	1.40601	0.15972	0.356412	false	52.4869	62.602	17.2349	22.1318	19.4394	26.0744	29.6575	12.0164	13.427	12.7126	21.3166	10.1596	12.2932	21.7594	20.6631	5.5391	7.93164	33.8945	9.41415	12.055	57.8325	15.0196	21.0676	10.386
NTRK2	0.942793	1.02499	0.91981	0.357672	0.553563	false	259.347	399.262	3407.59	4196.9	30.1311	414.745	62.2808	4188.78	737.646	10246.4	619.109	2737.56	108.18	28.3818	335.775	3300.51	176.876	402.6	21.3958	1852.76	68.0382	434.631	337.891	126.23
NUMBL	-0.00652585	0.350965	-0.018594	0.985165	0.995457	false	460.032	125.204	332.388	407.692	191.478	184.15	180.911	187.314	225.742	129.51	169.606	166.248	88.5108	203.403	177.703	454.997	190.359	116.564	87.2948	136.315	295.966	237.498	106.148	198.932
NUPR1	-0.469396	0.493858	-0.950469	0.341874	0.540865	false	659.174	217.02	457.136	110.659	590.958	69.26	74.1438	248.81	139.305	310.665	325.31	153.318	1023.61	209.079	382.267	538.084	630.566	432.361	210.535	867.034	57.8325	143.625	591.513	353.123
OSM	-0.369195	0.452009	-0.816786	0.414051	0.607019	false	91.0802	119.639	39.3941	39.6043	44.7106	52.1487	26.6918	243.155	97.3458	104.085	121.412	60.9578	59.8268	70.9544	40.293	22.9477	42.8309	100.857	215.67	139.096	129.273	67.5884	85.0806	65.5116
PAX5	-0.104138	0.461772	-0.225518	0.821577	0.899559	false	15.4373	80.687	16.4142	17.4725	27.2152	25.2595	32.6233	30.3944	52.0297	77.8648	30.5847	20.3193	22.9473	16.083	73.354	19.7825	50.7625	93.4165	13.6933	14.837	37.421	61.0173	24.3087	38.3483
PAX8	0.0428428	0.346362	0.123694	0.901558	0.955757	false	84.9053	25.0408	9.02782	51.2527	59.2902	17.1113	50.4178	14.8438	20.9797	31.7816	13.9021	37.8677	27.8645	28.3818	36.1604	28.4868	21.4154	26.4542	27.3866	40.8016	51.0286	59.1398	34.0322	35.1526
PBRM1	-0.507249	0.24848	-2.04141	0.0412104	0.149601	false	290.222	333.877	752.592	525.34	629.837	678.748	421.137	524.481	679.742	591.137	660.815	622.508	540.08	604.532	609.562	1057.18	689.26	568.766	1116	837.361	102.057	432.753	1323.21	656.714
PBX1	-1.60519	0.562625	-2.85304	0.00433033	0.0326128	true	1478.9	80.687	217.488	550.966	210.918	102.668	243.192	225.484	68.8134	177.977	364.236	152.394	220.458	215.701	371.936	1757.48	190.359	133.925	480.122	1001.49	258.545	88.2404	679.834	132.621
PBX3	-0.511844	0.285156	-1.79496	0.0726601	0.224501	false	334.99	404.826	461.24	507.867	299.367	579.34	222.431	166.109	280.289	325.761	213.166	214.276	564.666	305.577	243.825	534.127	703.537	297.61	480.122	440.472	227.928	136.115	351.666	231.687
PCK1	0.288097	0.308228	0.934687	0.349949	0.547808	false	49.3994	15.3027	13.9521	16.3077	31.1031	10.5927	32.6233	19.0849	25.1756	17.4799	7.41447	13.854	18.8495	28.3818	16.5305	15.826	12.6906	23.9741	11.9816	15.7643	27.2153	28.1618	46.1866	26.3644
PCNA	-1.13509	0.317488	-3.57523	0.000349918	0.00648694	true	101.886	400.653	870.774	418.175	238.133	469.338	578.321	595.165	473.302	861.28	519.013	467.343	537.621	332.067	325.444	1080.12	1621.23	958.139	742.006	1808.25	136.076	681.516	274.689	1346.98
PDGFA	0.428323	0.37704	1.13602	0.25595	0.455793	false	64.8368	75.1224	123.927	46.5933	148.712	121.409	97.8698	78.46	115.808	95.3447	101.949	86.8187	67.2027	119.203	53.7241	50.6432	97.5592	79.3627	86.439	51.9293	78.2439	117.341	794.085	91.0771
PDGFB	0.864012	0.276479	3.12505	0.00177772	0.0178513	false	35.5058	45.9081	36.932	45.4285	28.1871	26.0744	32.6233	65.0299	73.8486	33.3706	48.1941	27.7081	27.8645	63.386	34.0941	18.1999	34.8992	25.6275	16.2608	21.3281	34.0191	26.2844	42.9454	25.5655
PDGFC	0.726472	0.29977	2.42343	0.0153746	0.0756178	false	1063.63	343.616	400.507	265.582	350.881	397.634	341.061	147.024	417.077	175.593	320.676	147.776	440.096	458.839	318.212	250.842	176.082	257.929	225.94	112.204	479.669	170.848	247.949	228.492
PDGFD	0.297847	0.54488	0.546628	0.584634	0.763166	false	44.7682	27.8231	65.6569	29.1208	94.2811	48.0746	32.6233	47.3588	32.7283	45.2887	86.1933	115.45	54.09	67.1702	332.676	134.521	39.6582	66.1356	29.0983	80.6759	27.2153	65.7109	535.602	119.039
PDGFRA	1.46834	0.471871	3.11175	0.00185982	0.018228	true	325.728	191.98	105.872	135.121	257.572	183.335	47.452	300.41	138.466	192.278	177.947	310.331	134.405	363.287	670.518	79.13	90.4207	206.674	24.8191	50.0747	74.842	125.789	432.695	316.373
PDGFRB	1.2477	0.395367	3.15581	0.00160055	0.0170176	true	1759.85	1235.35	1465.79	603.384	3392.18	964.751	216.5	1533.15	1659.91	1620.86	2240.1	2304.39	2222.61	2367.99	1588.99	660.735	1202.44	1229.3	179.725	745.557	598.736	695.597	3408.08	2364.01
PGF	1.01771	0.321984	3.16075	0.00157361	0.0169809	true	299.484	503.598	131.314	125.802	593.874	435.931	314.37	272.136	524.493	247.102	635.791	247.526	453.208	312.2	203.532	227.103	299.023	176.086	108.691	178.971	91.8516	229.049	281.981	634.344
PHF6	-0.149406	0.244255	-0.61168	0.540749	0.732198	false	478.557	534.204	614.713	557.955	412.116	654.303	349.959	927.383	659.602	771.497	579.256	516.294	1341.59	524.117	386.4	548.371	603.598	581.993	984.206	844.779	255.143	873.955	511.294	466.57
PIK3CA	-0.498365	0.249775	-1.99525	0.0460156	0.159948	false	642.193	541.16	711.556	916.724	828.119	740.675	269.883	814.288	948.283	1196.58	629.303	815.541	903.138	1257.31	502.113	2067.67	1126.29	731.625	839.571	1212.92	207.517	666.496	600.426	483.348
PIK3CB	-0.259546	0.220937	-1.17475	0.240094	0.43725	false	211.491	378.394	279.862	309.846	381.984	215.928	249.123	229.725	131.753	236.773	392.967	225.359	375.352	317.876	227.294	260.338	479.071	284.383	309.811	370.924	207.517	252.518	335.461	180.556
PIK3CD	0.797422	0.425619	1.87356	0.0609914	0.197744	false	294.853	786.003	54.9876	302.857	242.993	374.819	234.294	380.284	394.418	228.033	459.697	260.456	122.932	250.706	355.405	45.8954	273.642	305.05	147.203	74.1848	741.616	505.035	158.817	298.797
PIK3CG	0.483589	0.488436	0.990077	0.322137	0.52456	false	43.2245	118.248	34.4699	81.5384	96.2251	35.8522	47.452	168.936	57.904	100.112	82.486	51.7218	106.541	46.3569	413.262	45.8954	30.1402	72.7491	71.8899	143.733	54.4306	126.728	119.923	59.9191
PIK3R1	-1.2444	0.508655	-2.44646	0.0144269	0.0731943	true	597.424	378.394	233.903	394.879	901.989	361.782	293.609	565.478	363.368	358.337	522.72	389.76	376.171	842.939	843.055	4211.3	199.877	348.865	510.932	621.297	455.856	220.601	1304.57	228.492
PIK3R2	0.492405	0.258301	1.90632	0.0566087	0.188609	false	1180.96	772.092	1179.36	668.615	452.938	456.301	922.348	793.082	485.89	455.271	683.985	391.608	386.825	440.864	387.433	381.407	523.488	485.27	415.934	334.759	455.856	469.364	371.113	234.084
PIK3R3	-1.27946	0.362819	-3.52644	0.000421187	0.00715865	true	412.177	268.493	370.141	231.802	507.369	233.854	130.493	436.832	213.154	185.922	143.655	314.025	338.472	206.241	416.362	1084.08	392.616	296.783	387.692	1594.05	231.33	156.767	492.657	317.971
PIK3R5	0.472295	0.383966	1.23004	0.218681	0.425017	false	84.9053	139.116	50.0634	114.154	167.179	71.7045	100.836	279.205	101.542	142.222	133.461	136.693	117.195	113.527	520.71	94.956	69.7985	104.164	119.816	155.788	125.871	109.831	131.267	123.034
PIM1	-0.536515	0.367373	-1.46041	0.144177	0.333627	false	1857.11	2072.82	1582.33	1115.91	671.632	1680.17	5068.47	1204.47	1234.45	2217.56	2135.37	1652.33	653.177	1344.35	1017.66	946.395	3874.61	1715.39	3369.41	678.791	6572.49	1866.19	1311.86	1872.67
PITX2	-0.655722	0.322251	-2.03482	0.0418692	0.149859	false	27.7872	36.1701	29.5456	20.967	10.6917	13.852	17.7945	36.0492	15.1054	20.658	7.41447	15.7012	36.8795	35.9502	11.3647	53.0171	39.6582	25.6275	20.54	38.0197	23.8134	24.4069	30.7911	19.1741
PKMYT1	-0.616734	0.379692	-1.6243	0.104312	0.280362	false	288.678	420.129	322.539	214.329	207.03	463.635	940.143	295.462	260.148	195.457	240.044	146.853	208.984	168.399	149.807	247.677	366.442	438.975	730.88	267.065	1217.88	551.033	51.0483	269.237
PLA1A	0.45515	0.379597	1.19904	0.230514	0.427857	false	15.4373	8.34694	13.1314	12.8132	31.1031	16.2965	8.89725	21.9123	10.9094	24.6307	18.5362	30.4789	31.1427	16.083	66.1219	30.8607	11.8975	11.5737	12.8375	16.6916	10.2057	27.2231	25.119	12.7828
PLA2G2A	1.14065	0.783342	1.45613	0.145356	0.333627	false	15.4373	9.73809	18.8764	20.967	8.74774	12.2224	29.6575	18.378	32.7283	10.329	170.533	96.9783	18.03	36.8963	384.334	15.0347	15.0701	16.5339	10.27	92.731	40.8229	20.652	174.213	23.1687
PLA2G3	1.47873	0.724986	2.03967	0.0413833	0.149601	false	20.0685	100.163	689.397	62.901	54.4304	28.5188	32.6233	529.428	20.1405	228.033	48.1941	161.63	12.2932	16.083	53.7241	40.3563	140.39	40.508	12.8375	51.002	40.8229	50.6913	29.9808	86.2836
PLA2G4A	-0.651423	0.674601	-0.965642	0.334223	0.53337	false	54.0306	115.466	119.824	208.505	40.8228	693.415	180.911	127.232	24.3365	32.5761	29.6579	70.1938	106.541	16.083	78.5198	234.225	687.673	81.8428	69.3224	107.568	57.8325	61.956	182.316	413.043
PLA2G4C	-0.429548	0.351743	-1.2212	0.222011	0.425931	false	37.0496	30.6054	82.0711	25.6263	26.2432	53.7784	32.6233	117.337	30.2108	70.714	81.5592	57.2634	66.3831	72.8466	112.614	62.5127	149.115	56.2152	41.0799	127.969	51.0286	40.3653	59.1513	51.131
PLA2G4E	0.472592	0.736575	0.641607	0.521128	0.717092	false	32.4184	987.721	397.224	177.055	469.462	2064.76	1046.91	1119.65	75.5269	699.989	603.353	604.036	16.3909	116.365	240.725	23.739	740.022	580.34	708.629	52.8566	166.694	447.773	188.798	389.874
PLA2G4F	0.0305286	0.57902	0.0527246	0.957951	0.984602	false	41.6808	311.619	118.182	181.714	27.2152	112.446	341.061	135.008	36.9243	121.564	168.679	31.4025	22.1277	67.1702	51.6578	36.3998	147.529	236.435	53.9174	23.1827	47.6267	94.8115	18.6367	30.359
PLAT	-0.601315	0.570858	-1.05335	0.292179	0.492414	false	2133.44	651.061	732.074	1047.19	1721.36	211.854	1720.14	2023	1641.45	3283.03	1598.75	4837.83	1490.75	931.868	2447.54	10905.7	850.272	853.149	737.727	652.826	316.378	653.354	808.671	469.766
PLAU	1.24002	0.461455	2.6872	0.0072053	0.0461012	true	1302.91	6759.63	2743.64	1172.99	8143.17	7065.33	2651.38	2946.14	17393	8159.12	5128.04	4361.25	5461.45	3348.1	1189.16	1736.9	2222.45	3610.18	2302.19	1052.5	2129.6	2416.28	1230.83	3116.59
PLCB1	0.233801	0.366128	0.638575	0.523099	0.717648	false	242.366	58.4286	41.8563	208.505	50.5425	77.4082	50.4178	81.9943	32.7283	41.316	46.3405	40.6385	42.6163	55.8175	129.144	41.1476	39.6582	57.0419	24.8191	89.0217	102.057	36.6104	59.1513	30.359
PLCB4	1.89132	0.676678	2.79501	0.00518985	0.0364297	true	80.2741	52.8639	135.417	1504.97	18.4674	44.0005	68.2123	59.3752	42.7986	51.645	56.5354	20.3193	110.639	92.7138	74.3872	45.1041	14.277	33.0678	16.2608	22.2554	258.545	115.463	73.7365	35.1526
PLCE1	0.0684145	0.678881	0.100775	0.919729	0.965114	false	37.0496	19.4762	182.198	72.2197	24.2993	17.1113	32.6233	22.6191	10.9094	33.3706	22.2434	24.0137	17.2104	25.5436	51.6578	108.408	10.3111	14.0538	6.84665	66.7663	30.6172	13.1422	286.843	14.3806
PLCG2	0.931911	0.378447	2.46247	0.0137986	0.0712597	false	196.054	193.371	138.7	235.296	118.58	228.965	112.699	293.342	289.52	168.442	241.897	305.713	117.195	73.7926	752.137	83.8778	129.286	121.524	142.068	150.224	163.292	301.331	260.914	451.391
PLD1	-0.480938	0.39099	-1.23005	0.218678	0.425017	false	1776.84	854.17	934.79	687.252	768.829	585.858	756.266	1112.58	1062.41	1523.93	1165	1441.74	383.547	1345.3	473.185	2043.93	967.66	436.495	477.554	3394.88	350.397	679.639	333.84	675.888
PML	-0.277798	0.308567	-0.900282	0.36797	0.563649	false	2611.99	2767.01	609.788	780.439	1176.08	1493.57	3653.8	990.293	1017.94	1577.95	1100.12	663.147	545.817	975.387	925.707	1072.21	906.587	1885.69	2601.73	591.624	5596.14	1694.4	474.831	519.299
POLB	-0.159932	0.288897	-0.553596	0.579856	0.763166	false	189.879	144.68	327.464	319.164	321.722	427.782	219.466	419.16	438.056	555.383	246.531	830.319	325.359	152.316	385.367	618.796	375.96	230.648	416.79	446.963	163.292	324.8	319.255	432.217
POLD1	-0.760239	0.28235	-2.69254	0.00709098	0.0461012	false	21.6123	26.432	64.8362	39.6043	42.7667	45.6301	65.2465	40.2903	46.1554	27.8089	56.5354	33.2497	21.3082	30.2739	28.9283	40.3563	91.2139	60.3487	93.2857	39.8743	102.057	53.5075	38.894	48.7342
POLD4	0.78008	0.315698	2.47097	0.0134748	0.0708075	false	1727.44	1354.99	852.719	482.241	1056.53	2126.69	649.499	1107.63	886.183	785.004	1613.57	1764.08	1186.7	2387.85	714.943	623.544	375.167	674.583	979.927	975.53	792.645	662.742	595.564	975.484
POLE2	-1.22329	0.239595	-5.10565	3.3e-07	2.98e-05	true	92.6239	109.901	190.405	156.088	138.992	240.373	71.178	161.868	143.501	126.332	177.947	176.408	168.826	68.1163	85.7519	284.868	477.485	346.385	276.434	366.287	119.067	142.687	111.82	301.992
POLR2D	-0.184744	0.20055	-0.921187	0.356953	0.553563	false	384.389	506.381	897.037	800.241	647.332	1017.71	584.253	858.819	478.337	754.017	550.525	482.121	783.485	620.615	526.909	870.43	805.855	816.774	615.343	778.94	605.54	925.585	508.863	1115.3
POLR2H	-0.4619	0.186759	-2.47324	0.0133895	0.0708075	false	1099.14	783.221	538.386	1065.82	672.604	916.676	756.266	843.975	733.45	1059.12	649.693	903.283	825.282	754.955	444.257	1065.09	1404.69	872.163	961.099	1005.2	874.291	720.004	397.853	561.642
POLR2J	0.344951	0.226271	1.52451	0.127382	0.308018	false	129.674	204.5	152.652	171.231	127.328	159.705	195.74	130.06	174.551	150.168	282.677	157.012	129.488	161.776	203.532	87.8343	191.153	161.205	93.2857	101.077	197.311	84.4855	97.2349	67.1094
PPARG	1.01633	0.531276	1.91299	0.0557494	0.187473	false	26.2434	29.2143	23.8006	323.824	36.9349	21.1854	53.3835	99.6654	20.1405	58.0013	44.4868	36.0205	23.7668	23.6515	160.139	15.826	13.4838	17.3606	62.4757	28.7466	51.0286	15.9584	32.4116	21.5709
PPARGC1A	0.78046	0.43321	1.80157	0.0716126	0.224501	false	152.829	37.5612	33.6492	32.6153	134.132	36.6671	71.178	50.893	145.18	135.866	173.313	111.756	49.9922	76.6308	202.498	50.6432	31.7266	58.6953	29.9541	102.931	81.6458	48.8138	48.6175	32.7558
PPP2CB	-0.180351	0.316729	-0.569419	0.569072	0.754934	false	566.55	758.18	2422.74	1760.06	1898.26	3295.15	857.102	2054.1	2227.21	4306.4	1202.07	3324.05	1739.89	1514.64	1001.13	3889.24	3432.81	1391.33	1043.26	3490.39	428.641	2611.54	1647.32	3526.44
PPP2R1A	0.397077	0.171578	2.31427	0.0206529	0.0939124	false	1230.35	2157.68	2516.3	1637.76	2107.23	2563.43	1310.86	1876.68	2724.84	2780.89	2806.38	2434.62	1950.52	2480.57	1591.06	1400.6	2834.77	1908.84	1538.79	1507.81	415.033	2746.72	2498.13	3313.13
PPP2R2B	-0.226153	0.394039	-0.573937	0.566011	0.754934	false	41.6808	30.6054	17.2349	131.626	30.1311	32.5929	94.904	86.2353	44.477	58.0013	26.8775	64.6522	44.2554	44.4648	65.0888	22.1564	33.3129	31.4144	88.1507	119.623	57.8325	53.5075	39.7043	47.9353
PPP2R2C	1.11109	0.552052	2.01266	0.0441505	0.156475	false	432.245	1249.26	2493.32	186.373	1255.79	2197.58	1367.21	577.494	1060.73	897.034	1230.8	1112.02	761.357	1401.11	497.981	182.79	1397.56	995.34	259.317	74.1848	268.751	1029.78	53.4792	1527.54
PPP3CA	-0.0245058	0.241461	-0.10149	0.919162	0.965114	false	197.598	343.616	578.601	287.714	550.135	341.411	302.507	496.207	695.687	560.15	601.499	458.107	656.455	492.897	344.041	673.396	349.785	247.182	307.244	1363.15	34.0191	656.17	528.31	641.534
PPP3CB	0.443632	0.274319	1.61721	0.105832	0.281349	false	243.91	347.789	283.966	165.406	174.955	494.598	335.13	240.328	480.016	284.445	380.919	367.594	399.118	272.465	406.03	141.643	149.908	304.224	353.459	276.338	115.665	336.064	464.297	249.264
PPP3CC	-0.117831	0.194194	-0.606772	0.544002	0.732198	false	162.092	178.068	183.839	302.857	214.806	288.448	192.774	248.103	245.882	162.88	163.118	171.79	181.119	227.054	324.411	214.442	253.813	213.287	170.311	339.395	197.311	264.721	190.418	205.323
PPP3R1	-0.13682	0.173577	-0.788238	0.430557	0.626344	false	2323.32	2541.64	2744.46	3606.33	3110.31	4004.04	1491.77	2678.24	2576.31	2350.25	2303.12	1823.19	2573.37	3332.97	2391.75	3211.89	3034.65	2739.67	2952.62	3066.61	1762.19	3121.27	2806.85	2456.68
PRDM1	0.0295316	0.30785	0.0959283	0.923577	0.967749	false	1360.03	2045	468.626	765.296	1230.51	1029.94	2162.03	1403.09	897.931	1491.35	1093.63	1081.54	1010.5	1002.82	3198.65	713.752	1207.2	1340.07	2068.55	1022.82	928.721	1196.88	1154.66	1282.27
PRKAA2	-1.18936	0.67661	-1.75781	0.0787791	0.235361	false	50.9432	13.9116	23.8006	270.241	21.3834	12.2224	29.6575	26.8602	15.9446	11.9181	25.0238	24.9373	27.045	18.9212	42.3594	143.225	13.4838	7.44025	150.626	63.9844	17.0095	15.9584	161.248	23.1687
PRKACA	0.00297025	0.224406	0.013236	0.989439	0.995913	false	1526.75	1239.52	4097.81	976.131	2219.01	1434.09	1972.22	2065.41	2022.44	1915.63	1646.94	1696.66	1715.31	1108.78	1438.15	2309.8	1741	1588.91	1717.65	2157.85	779.037	2232.29	1541.17	1490.79
PRKACB	0.336986	0.448823	0.750822	0.45276	0.647399	false	140.48	314.401	424.308	83.868	195.366	92.0751	142.356	255.172	689.813	233.594	246.531	174.561	457.306	221.378	240.725	443.919	42.0377	53.7352	112.97	537.84	34.0191	85.4242	230.933	156.589
PRKACG	0.0521936	0.232555	0.224435	0.822419	0.899559	false	32.4184	31.9966	11.49	41.934	25.2712	24.4447	65.2465	21.2054	26.0148	15.8908	21.3166	35.0969	31.1427	37.8424	38.2267	22.1564	22.2086	31.4144	32.5216	25.0374	54.4306	36.6104	37.2734	27.9623
PRKAR1B	0.520228	0.44456	1.17021	0.241917	0.438361	false	44.7682	41.7347	251.138	41.934	60.2622	177.632	103.801	105.32	71.331	81.8375	60.2426	96.9783	63.1049	176.913	49.5914	90.9995	72.9711	81.0161	61.6199	53.784	44.2248	102.321	687.937	118.24
PRKAR2A	0.0677987	0.178679	0.379445	0.704358	0.838963	false	541.85	658.017	1275.38	557.955	1085.69	1148.9	996.492	998.775	911.358	989.201	1088.07	1436.2	899.86	929.03	916.409	1121.27	943.865	751.466	1205.01	785.431	272.153	1030.72	730.883	974.685
PRKAR2B	0.710782	0.487126	1.45913	0.144528	0.333627	false	46.312	55.6462	38.5734	249.274	162.319	43.1856	17.7945	159.747	58.7432	143.812	103.803	67.423	83.5936	126.772	290.317	100.495	56.3147	46.2949	54.7732	104.786	34.0191	65.7109	213.107	71.903
PRKCA	0.550631	0.365177	1.50785	0.131593	0.311857	false	205.316	79.2959	382.451	66.3955	158.431	103.483	74.1438	122.991	161.124	118.386	100.095	104.367	152.435	299.901	162.205	152.721	123.734	138.885	71.034	54.7113	74.842	122.035	191.229	68.7073
PRKCB	0.8961	0.499214	1.79502	0.0726503	0.224501	false	132.761	176.677	31.187	129.297	101.085	38.2967	29.6575	247.396	52.0297	114.414	142.729	52.6454	98.3454	52.9793	392.599	42.7302	23.7949	83.4962	98.4206	65.839	57.8325	91.9953	140.18	43.9407
PRKDC	-0.450627	0.276253	-1.63121	0.102846	0.280272	false	2415.94	3781.16	2160.93	4834.06	1705.81	2944.77	2885.67	2048.44	2319.52	2046.73	3879.62	1985.75	1498.95	3198.63	1635.48	2035.22	4329.88	3739.14	3499.5	2239.45	13447.7	3349.38	1427.73	2964.8
PRKX	-0.0559228	0.482438	-0.115917	0.907718	0.960879	false	358.146	193.371	196.971	1177.65	429.611	68.4452	222.431	245.276	245.043	205.786	198.337	115.45	135.225	167.452	239.692	259.546	115.009	325.718	245.624	349.596	278.957	125.789	720.349	75.8976
PRLR	0.613196	0.558087	1.09875	0.271878	0.472519	false	35.5058	29.2143	18.0556	32.6153	65.122	22.8151	26.6918	29.6876	231.616	24.6307	232.629	35.0969	140.962	19.8672	63.0225	30.8607	17.4496	17.3606	61.6199	92.731	23.8134	25.3456	23.4984	21.5709
PRMT8	1.7747	0.660097	2.68855	0.00717633	0.0461012	true	23.156	15.3027	133.776	97.846	8.74774	166.224	35.589	26.1533	12.5878	11.1235	11.1217	48.0273	17.2104	16.083	15.4973	7.1217	13.4838	14.8805	14.5491	12.9823	40.8229	163.339	12.9647	23.9677
PROM1	-0.121806	0.224572	-0.542394	0.587547	0.7654	false	33.9621	26.432	18.0556	33.7802	36.9349	17.1113	56.3493	33.2218	32.7283	27.8089	26.8775	33.2497	23.7668	31.22	36.1604	41.1476	19.0359	35.5479	24.8191	34.3105	81.6458	28.1618	37.2734	19.1741
PTCH1	0.670354	0.657262	1.01992	0.307766	0.51242	false	120.411	45.9081	208.461	491.56	70.9539	82.2972	17.7945	45.2382	46.9945	74.6867	55.6086	48.0273	33.6013	74.7387	114.68	71.217	42.8309	100.857	71.8899	12.9823	40.8229	81.6693	752.761	31.9569
PTEN	0.75122	0.216429	3.47097	0.000518579	0.00829198	false	773.41	1538.62	1415.73	540.483	2194.71	2533.29	972.766	1562.84	2261.61	1705.08	2352.24	1697.58	2744.66	1648.98	1576.59	956.682	1146.12	1414.47	953.397	851.27	472.865	1315.16	2143.22	1713.69
PTPN11	0.22503	0.162783	1.38239	0.166852	0.364969	false	656.086	1240.91	1587.26	1348.88	1397.69	2151.13	1195.2	1523.96	1592.78	1635.96	1683.09	1818.57	1879.22	1501.4	943.271	1244.71	1213.54	1283.86	1469.46	1379.84	632.755	1780.77	1276.21	1165.63
PTPRR	3.84121	0.875744	4.38623	1.15e-05	0.000490511	true	13.8936	44.517	6.56569	11.6483	11.6636	2.44447	14.8288	25.4465	254.274	7.94539	70.4375	18.4721	304.871	30.2739	14.4642	0.7913	0.793164	7.44025	0.855832	9.2731	61.2344	55.3849	19.447	7.98922
PTTG2	-1.22606	0.362671	-3.38063	0.000723196	0.0100946	true	688.505	1128.23	1258.97	1048.35	1014.74	1029.94	1847.66	651.713	1336.83	731.77	487.502	601.265	1750.55	806.042	596.13	1760.64	2090.78	1536.83	2585.47	3956.83	962.74	2643.46	282.792	1202.38
RAC1	0.388786	0.245899	1.58108	0.113859	0.288975	false	656.086	1297.95	4276.73	644.153	6322.67	3827.23	1390.94	4308.94	3011.85	2911.99	2856.43	3862.51	2537.31	1989.56	2491.97	3485.68	2909.33	1970.01	1279.47	3183.45	146.282	2891.28	1953.61	3345.89
RAC2	1.28271	0.448406	2.8606	0.00422845	0.0321807	true	154.373	485.513	206.819	336.637	920.456	145.039	507.143	490.552	447.287	429.051	389.26	169.019	1522.71	183.535	615.76	68.0518	89.6276	295.13	188.283	370.924	78.2439	293.822	260.103	178.959
RAC3	0.341513	0.564015	0.605504	0.544844	0.732198	false	1188.67	193.371	469.447	467.098	96.2251	420.449	91.9383	144.197	92.3107	107.263	239.117	241.06	117.195	146.639	37.1936	86.2517	106.284	509.244	104.411	100.149	275.555	212.152	864.581	304.389
RAD21	-0.52834	0.233548	-2.26224	0.0236827	0.103773	false	2738.58	3882.72	4347.31	5354.74	5043.56	6115.25	2135.34	4839.08	5515.98	4296.87	3782.31	9056.85	4489.47	6193.85	2875.27	5577.87	8371.06	6535.85	7319.93	6917.73	6171.06	5948.72	4524.67	6920.26
RAD50	-0.351288	0.288934	-1.21581	0.224059	0.425931	false	74.0991	77.9047	237.185	149.099	515.144	261.558	118.63	238.207	224.902	221.676	271.555	271.539	453.208	323.552	287.217	299.111	348.199	184.353	385.124	472.928	78.2439	188.684	547.757	279.623
RAD51	-0.491613	0.323257	-1.52081	0.128307	0.30922	false	16.9811	55.6462	119.824	55.912	124.412	170.298	65.2465	159.747	176.23	111.235	69.5107	75.7354	59.0072	66.2241	49.5914	157.469	132.458	114.084	107.835	220.7	17.0095	184.929	50.2381	143.007
RAD52	0.176198	0.33483	0.52623	0.598728	0.771895	false	429.158	123.813	160.859	195.692	75.8137	335.707	142.356	242.449	113.29	116.797	264.141	159.783	184.398	237.461	120.879	84.6691	120.561	237.261	148.915	227.191	163.292	247.824	163.679	92.6749
RAF1	-0.309726	0.195619	-1.58332	0.11335	0.288975	false	429.158	573.156	915.913	663.955	676.492	709.711	400.376	1083.6	783.802	1115.53	835.982	1095.39	807.252	821.179	827.557	1239.18	1111.22	528.258	1157.94	1057.13	476.267	652.416	1090.65	927.548
RASA4	0.270397	0.36424	0.742359	0.45787	0.647827	false	239.279	136.333	408.714	107.165	102.057	262.373	136.425	150.558	164.481	125.537	386.479	420.239	106.541	174.075	372.969	97.3299	239.536	195.1	221.66	205.863	102.057	113.586	315.203	325.161
RASAL1	0.0152477	0.623103	0.0244705	0.980477	0.995457	false	373.583	115.466	267.552	26.7912	22.3553	70.0748	596.116	206.399	28.5324	170.031	101.949	181.95	15.5714	28.3818	86.785	99.7038	128.493	85.9763	261.885	77.894	30.6172	153.951	51.0483	107.056
RASGRF2	0.309677	0.277133	1.11743	0.263811	0.464076	false	37.0496	15.3027	18.0556	13.978	29.1591	14.6668	23.726	13.4301	10.0703	27.0143	17.6094	14.7776	14.7518	21.7594	35.1273	18.9912	15.0701	19.014	11.1258	12.9823	27.2153	13.1422	32.4116	22.3698
RASGRP1	0.240331	0.477311	0.503512	0.614605	0.782322	false	50.9432	198.935	71.4019	269.077	60.2622	191.484	228.363	426.936	45.3162	185.922	269.701	135.77	69.6613	57.7096	306.847	145.599	146.735	101.683	231.075	103.859	40.8229	183.991	123.975	55.1256
RASGRP2	1.22072	0.433007	2.81917	0.00481483	0.0348112	true	32.4184	55.6462	24.6213	39.6043	43.7387	26.0744	68.2123	149.852	32.7283	46.8778	125.119	68.3466	46.7141	46.3569	203.532	24.5303	23.7949	39.6813	23.1075	35.2378	54.4306	56.3236	92.3732	43.9407
RB1	-0.541386	0.317977	-1.70259	0.0886444	0.259473	false	1678.04	1538.62	1895.02	1301.12	2130.56	1392.53	1150.71	1000.9	1265.5	953.447	852.664	1287.5	751.523	1160.81	1097.21	1267.66	389.444	2204.79	2267.1	3339.24	901.506	1431.56	745.468	1565.89
RBX1	-0.180257	0.201607	-0.894102	0.371267	0.5663	false	2540.98	4926.08	4104.38	2174.74	3788.74	2919.51	3698.29	2941.19	3181.36	3209.94	2830.48	2439.23	3892.02	2382.18	2097.3	4268.27	3700.11	2928.15	3552.56	4399.16	1170.26	3645.08	1993.32	3365.86
RELA	0.258236	0.287703	0.89758	0.369409	0.564657	false	807.372	1704.17	552.339	506.703	688.155	1122.01	575.356	856.699	730.933	556.177	812.812	604.96	565.486	1066.21	412.229	796.048	473.519	810.988	658.99	586.06	197.311	729.391	422.162	665.502
RET	0.6818	0.497268	1.37109	0.170347	0.369852	false	29.3309	43.1258	33.6492	20.967	204.114	22.8151	65.2465	40.9971	332.319	85.8102	80.6324	51.7218	26.2254	52.9793	37.1936	37.1911	53.142	60.3487	46.2149	43.5836	34.0191	107.015	31.6014	162.98
RFC3	-1.2609	0.256994	-4.90635	9.28e-07	6.71e-05	true	351.971	552.289	1033.28	908.57	575.407	499.487	323.267	455.21	408.685	371.844	355.895	467.343	381.908	376.532	484.55	1909.41	1115.19	978.807	872.093	1269.49	568.119	506.913	575.307	838.069
RFC4	-1.04238	0.300714	-3.46635	0.000527567	0.00829198	true	179.073	488.296	1083.34	825.867	434.471	691.785	483.417	607.182	1048.99	872.404	444.868	999.338	614.659	520.333	408.096	749.361	2289.07	1352.47	664.125	2641.91	316.378	1034.48	423.782	993.06
RHOA	0.120255	0.288939	0.416196	0.677267	0.827135	false	118.867	691.405	594.195	376.241	1278.14	889.787	163.116	1183.97	1229.41	1198.96	844.323	1306.9	1087.54	1045.4	1044.52	1129.18	928.795	465.429	771.104	1177.68	102.057	678.7	1478.78	1487.59
RIN1	0.101739	0.480194	0.21187	0.832209	0.903434	false	356.602	1245.08	375.886	114.154	241.049	1084.53	335.13	245.276	205.601	201.813	380.919	243.831	417.148	435.187	111.581	163.799	279.987	787.013	446.744	120.55	401.425	346.39	100.476	211.714
RNF43	-0.494108	0.341825	-1.4455	0.148317	0.337212	false	109.605	97.3809	75.5054	139.78	61.2341	84.7416	148.288	74.2189	83.9188	58.7959	69.5107	76.659	158.992	58.6557	19.6299	159.843	94.3865	119.044	141.212	89.0217	44.2248	114.525	62.3924	27.1633
RPS27A	0.228381	0.222723	1.0254	0.305174	0.509562	false	29945.3	63969.5	72882.4	89080.7	52951	81924	35375.5	66498.8	46863.6	44749.2	49141.3	96257.9	63018.9	57275.4	58866.1	47467.7	53750.4	42069.7	67361.7	51606.6	61843.3	65025.6	88722.8	57420.9
RPS6KA5	-0.957875	0.243782	-3.92922	8.52e-05	0.00201533	false	365.865	443.779	419.383	665.12	286.731	337.337	231.329	491.966	502.674	234.389	340.139	371.288	272.089	231.784	253.123	841.152	666.258	450.549	849.841	604.606	738.214	356.716	269.017	489.739
RPS6KA6	0.764094	0.633421	1.2063	0.227703	0.427779	false	125.042	11.1292	141.983	16.3077	12.6356	12.2224	29.6575	20.4986	16.7838	15.8908	9.26809	24.9373	11.4736	18.9212	21.6963	34.8172	15.0701	11.5737	11.9816	19.4735	6.80382	16.8971	113.441	20.772
RRAS2	0.160962	0.282674	0.569426	0.569067	0.754934	false	384.389	510.554	1331.19	562.615	787.296	842.528	355.89	558.409	822.404	497.381	347.553	431.322	1361.26	817.395	219.029	614.049	793.164	419.134	700.07	655.608	132.674	859.874	593.943	776.552
RUNX1	-0.237881	0.233494	-1.01879	0.308303	0.51242	false	307.203	260.146	145.266	146.769	318.806	153.187	142.356	255.172	292.037	202.607	263.214	147.776	262.254	282.872	251.057	238.973	214.154	238.088	357.738	309.721	173.497	215.907	316.014	142.208
RUNX1T1	1.29929	0.590497	2.20033	0.0277833	0.117982	false	558.831	129.378	50.0634	74.5494	104.001	64.3711	56.3493	86.9422	78.8837	77.0703	129.753	120.992	75.3981	104.067	268.62	37.1911	46.0035	85.1496	17.1166	42.6562	91.8516	58.2011	1105.24	58.3213
RXRG	-0.918009	0.556776	-1.64879	0.0991899	0.27638	false	10.8061	20.8673	7.3864	64.0659	17.4955	8.96306	23.726	16.2575	26.0148	32.5761	15.7558	29.5553	8.19545	16.083	50.6246	13.4521	168.151	9.92034	11.1258	15.7643	20.4115	19.7133	12.1544	21.5709
SETBP1	0.184184	0.434607	0.423795	0.671716	0.823136	false	913.89	1165.79	763.261	875.955	373.237	969.64	358.856	1086.42	484.212	271.732	1421.73	489.509	282.743	498.573	897.812	176.46	326.784	852.322	1430.09	369.997	1527.46	448.712	2568.62	687.073
SETD2	-0.254989	0.183293	-1.39115	0.164179	0.360795	false	776.497	542.551	566.291	387.89	334.358	492.153	361.822	443.9	422.951	369.461	574.622	407.309	372.893	524.117	493.848	618.796	410.859	462.122	783.086	389.47	1109.02	403.653	575.307	285.215
SF3B1	-0.382545	0.160449	-2.38421	0.0171156	0.0819509	false	2923.83	2089.52	1812.13	2590.59	2494.08	1974.32	1690.48	1311.91	1897.4	1593.85	1814.69	1858.29	1868.56	1790.89	1980.56	2681.72	2336.66	2322.19	3075	2411.01	1731.57	2255.76	2155.37	2990.36
SFN	-0.0452746	0.52336	-0.0865075	0.931063	0.971847	false	13114	56763.3	65002.8	8827.11	28783	87415.9	98534.1	29748.4	38978.6	35722.5	36174.3	62098.4	26221.3	17607.1	11872	43396.5	68650	30977.9	48060.1	29548.7	37550.3	120976	4337.49	76608.6
SFRP1	0.312019	0.874027	0.35699	0.7211	0.850498	false	49.3994	101.554	704.17	73.3845	1629.99	55.408	86.0068	55.1341	120.843	49.2614	119.558	183.797	40.9772	495.735	1039.35	970.134	705.123	44.6415	45.3591	127.041	71.4401	195.255	7329.08	782.145
SFRP2	1.35248	0.678558	1.99316	0.0462436	0.159972	false	3004.1	488.296	2930.76	307.516	3269.71	598.895	77.1095	1267.38	3363.47	4229.33	2203.03	2634.12	3232.28	5273.33	3531.32	2092.2	1138.98	1613.71	28.2424	1412.29	91.8516	1050.44	9917.96	4970.89
SFRP4	0.168594	0.829382	0.203276	0.838919	0.909353	false	183.704	18.085	42.677	264.417	259.516	48.8894	20.7603	137.835	95.6675	226.444	392.967	684.39	77.0372	508.034	962.901	894.169	4.75899	345.558	6.84665	42.6562	37.421	386.756	474.831	178.959
SGK2	0.201988	0.228299	0.884751	0.376291	0.571551	false	30.8746	18.085	18.8764	18.6373	18.4674	19.5558	29.6575	22.6191	12.5878	18.2744	17.6094	20.3193	18.03	25.5436	16.5305	7.1217	16.6564	14.0538	30.8099	14.837	34.0191	15.0196	24.3087	19.973
SHC1	0.5173	0.324875	1.59231	0.111316	0.288975	false	2358.82	3943.93	2322.61	1559.71	5570.36	9751.81	1183.33	2816.08	4827.85	3768.5	4368.98	3198.44	6130.19	6815.41	3933.22	4637.81	3512.13	3537.43	2151.56	1920.46	724.607	2927.89	1926.87	3257.2
SHC2	-1.08509	0.365704	-2.96713	0.0030059	0.0246962	true	27.7872	27.8231	22.9799	37.2747	28.1871	29.3336	17.7945	23.326	29.3716	26.2198	39.8528	32.3261	8.19545	49.1951	58.8898	118.695	19.0359	28.1076	53.9174	85.3125	68.0382	21.5907	37.2734	15.9784
SHC3	1.39934	0.343239	4.07686	4.56e-05	0.00126935	true	16.9811	19.4762	16.4142	32.6153	63.1781	15.4816	20.7603	32.515	57.904	26.2198	35.2187	37.8677	26.2254	35.9502	47.5251	7.913	28.5539	7.44025	11.9816	12.055	13.6076	15.0196	30.7911	47.9353
SHC4	0.635237	0.420227	1.51165	0.130622	0.311857	false	21.6123	23.6497	4.92427	38.4395	87.4774	15.4816	11.863	31.8081	88.1148	33.3706	31.5115	22.1665	30.3232	46.3569	46.492	29.2781	40.4514	19.014	14.5491	19.4735	23.8134	19.7133	44.566	23.9677
SIN3A	-0.283212	0.233373	-1.21356	0.224915	0.425931	false	396.739	381.177	436.618	363.428	467.518	1134.23	406.308	464.399	344.906	680.92	438.381	491.357	319.622	404.913	421.527	667.857	486.21	498.497	619.622	690.846	329.985	559.482	478.072	392.271
SIRT4	-0.30279	0.260262	-1.16341	0.244665	0.441129	false	35.5058	11.1292	31.187	22.1318	41.7947	52.9635	38.5548	26.8602	20.9797	28.6034	28.7311	37.8677	31.9622	41.6266	37.1936	54.5997	60.2805	24.8008	30.8099	30.6012	44.2248	42.2427	48.6175	29.5601
SIX1	0.0864814	0.305321	0.283247	0.776987	0.874317	false	98.7989	19.4762	39.3941	85.0329	24.2993	39.1115	65.2465	26.8602	26.0148	30.1925	12.0485	18.4721	22.9473	20.8133	21.6963	34.8172	23.7949	16.5339	43.6474	21.3281	47.6267	19.7133	21.0676	23.9677
SKP1	-0.355297	0.275735	-1.28855	0.197555	0.406601	false	1594.68	2645.98	5694.09	3492.17	9813.02	4325.9	2909.4	5058.2	5011.63	5830.33	4761.02	5540.69	9867.32	6387.79	4142.95	6660.37	5658.43	2598.3	7771.81	13893.9	639.559	3198.24	7629.7	5615.62
SKP2	-0.00572569	0.32214	-0.0177739	0.985819	0.995457	false	359.69	1407.85	1958.22	740.834	585.126	1474.83	513.075	947.175	1391.37	1717	1028.76	633.591	445.013	459.785	588.898	1141.85	1064.43	1077.18	838.715	986.657	432.043	1178.1	756.002	1476.41
SMAD2	-0.0091839	0.338844	-0.0271036	0.978377	0.99489	false	1099.14	1047.54	774.751	2175.91	1213.99	1183.12	640.602	1290.7	620.999	529.957	1743.33	708.403	501.561	1002.82	877.149	888.63	374.374	1396.29	1171.63	1245.38	823.262	526.626	1813.43	755.78
SMAD3	0.256786	0.394353	0.651157	0.514945	0.713878	false	1438.76	1076.75	933.148	665.12	1180.94	3467.89	655.431	1133.08	808.138	1457.18	867.493	645.598	242.585	993.362	492.815	619.588	531.42	962.273	1107.45	1048.79	1507.05	594.214	1367.77	363.509
SMAD4	-0.387561	0.309321	-1.25294	0.210226	0.416421	false	835.159	826.347	823.173	1231.23	881.577	1244.24	296.575	905.471	582.397	376.611	478.234	433.17	585.975	808.881	770.734	1073	378.339	986.247	1187.04	1157.28	551.109	518.178	1148.99	488.141
SMAD9	-0.903001	0.475833	-1.89773	0.0577321	0.191469	false	94.1677	27.8231	120.645	217.824	95.2531	44.8153	32.6233	56.5478	41.9594	49.2614	39.8528	53.569	54.09	54.8714	150.841	307.024	103.905	31.4144	84.7273	189.171	30.6172	36.6104	112.63	71.1041
SMARCA4	0.0676158	0.209236	0.323156	0.746577	0.865025	false	501.713	788.785	2645.15	966.812	1580.42	962.307	616.876	1316.86	1169.83	918.487	1238.22	1116.64	1271.11	813.611	801.728	982.794	1267.48	801.067	1097.18	1496.68	588.53	1010.07	1221.92	1277.48
SMARCB1	0.0647554	0.177332	0.365164	0.714989	0.846051	false	2391.24	3002.11	1059.54	2721.05	1166.36	1350.16	2040.44	1400.97	1054.02	1477.05	1366.12	940.228	812.988	1241.23	1248.05	1089.62	857.411	1679.02	2058.28	803.05	3412.12	1215.65	786.793	866.83
SMC1A	-0.591079	0.26632	-2.21943	0.0264576	0.113189	false	819.722	1769.55	1033.28	1121.73	728.006	584.228	1349.42	700.485	757.787	1240.28	908.273	493.204	547.456	595.071	803.795	801.587	586.148	2107.24	1384.74	1399.31	1442.41	1072.97	718.728	514.506
SMC1B	-4.10727	0.45104	-9.10622	8.53e-20	6.17e-17	true	20.0685	9.73809	15.5935	23.2967	7.77576	16.2965	23.726	8.48217	12.5878	7.94539	4.63405	14.7776	16.3909	10.4067	13.431	204.155	274.435	319.931	160.896	160.425	68.0382	11.2647	10.5338	158.985
SMC3	-0.271627	0.188698	-1.43948	0.150014	0.339026	false	385.933	1053.11	1476.46	875.955	1397.69	1008.75	791.855	1369.87	1125.35	1685.22	1205.78	1546.11	1262.92	1239.34	1128.21	1012.86	1354.72	1829.48	992.765	2490.75	659.971	1530.13	1387.22	1740.05
SMO	0.621198	0.514029	1.20849	0.226859	0.427779	false	185.248	254.582	317.615	523.01	108.861	68.4452	121.596	342.114	130.074	227.238	266.921	283.546	51.6313	243.137	169.437	193.868	116.595	290.997	38.5124	110.35	47.6267	57.2624	517.776	79.8922
SOCS1	0.256864	0.395843	0.648903	0.516401	0.713878	false	55.5744	285.187	169.887	119.978	225.497	80.6675	106.767	496.207	360.012	445.736	545.891	161.63	195.871	136.233	379.168	121.069	567.906	186.006	118.961	416.362	37.421	357.655	737.365	375.493
SOCS2	-0.144431	0.377188	-0.382915	0.701783	0.838963	false	94.1677	158.592	75.5054	111.824	231.329	221.632	154.219	192.969	302.108	85.8102	95.4613	104.367	189.315	206.241	180.802	221.564	167.358	103.337	145.491	293.957	261.947	76.9756	801.378	252.459
SOCS3	-0.633688	0.484462	-1.30802	0.190865	0.397359	false	881.471	1674.95	423.487	766.461	829.091	2131.58	640.602	3677.73	1056.54	961.392	1612.65	703.785	854.785	939.437	845.121	346.589	1814.76	1356.61	5602.27	401.525	2486.8	1522.62	924.542	803.715
SOS1	-0.284602	0.160579	-1.77235	0.0763366	0.22989	false	1130.01	709.49	521.972	984.284	564.715	935.417	613.91	701.899	600.859	542.67	661.742	636.362	755.62	605.478	854.419	864.891	523.488	920.938	993.621	844.779	996.76	689.026	739.796	397.863
SOS2	-0.372011	0.234288	-1.58784	0.112323	0.288975	false	622.124	269.884	378.348	245.78	450.022	656.748	590.184	257.999	455.679	253.458	463.405	451.642	467.141	480.598	315.112	587.936	505.246	363.746	736.871	446.036	568.119	231.866	282.792	294.003
SOST	0.936893	0.538326	1.74038	0.0817919	0.243356	false	13.8936	27.8231	32.8284	147.934	13.6076	17.9261	11.863	16.2575	6.71351	38.9324	18.5362	13.854	9.01499	10.4067	7.23209	5.5391	15.0701	18.1873	5.99082	10.2004	23.8134	12.2035	21.0676	7.1903
SOX9	0.573935	0.498371	1.15162	0.249476	0.446463	false	453.857	1089.28	1481.38	1217.25	3232.77	809.935	1322.72	474.294	1965.38	580.808	1228.95	2238.81	1373.56	1569.51	350.24	2323.26	645.636	100.857	887.498	545.258	765.43	745.35	3330.3	609.577
SP1	-0.715308	0.167149	-4.27945	1.87e-05	0.000588938	false	446.139	378.394	416.921	390.219	366.433	281.929	240.226	261.533	269.379	289.212	282.677	301.094	242.585	351.934	271.72	561.032	477.485	562.152	525.481	439.545	278.957	346.39	323.306	161.382
SPOP	-0.227716	0.180615	-1.26078	0.207389	0.415399	false	49.3994	52.8639	46.7805	67.5604	69.0099	69.26	56.3493	57.9615	69.6526	69.9194	48.1941	65.5758	105.721	67.1702	94.0171	78.3387	69.0053	79.3627	71.8899	92.731	64.6363	44.1202	58.341	55.1256
SPP1	-0.977538	0.593232	-1.64782	0.0993898	0.27638	false	3544.41	3612.83	6044.54	13621.6	6103	489.709	1088.43	2189.11	3941.67	4393.8	722.911	2100.27	4714.84	4339.57	858.552	9130.02	4174.42	767.999	20651.2	2995.21	1748.58	1032.6	2327.97	1348.58
SPRY1	0.587936	0.350015	1.67974	0.0930072	0.263703	false	177.529	134.942	114.9	131.626	274.096	224.076	23.726	139.249	104.059	100.906	163.118	136.693	114.736	251.652	254.156	140.851	114.216	117.391	53.0616	118.696	125.871	99.5051	310.342	160.583
SPRY2	0.293943	0.481682	0.610242	0.541701	0.732198	false	199.141	179.459	99.306	1207.93	287.703	162.15	115.664	197.21	99.0242	147.784	234.483	267.845	196.691	157.046	202.498	489.023	129.286	138.885	62.4757	102.004	153.086	168.032	103.717	111.849
SPRY4	0.944139	0.25203	3.74614	0.000179576	0.00393435	false	126.586	237.888	196.971	163.077	167.179	270.521	210.568	159.747	284.485	164.47	193.703	152.394	192.593	197.726	66.1219	136.104	137.217	98.3767	77.0249	60.2751	61.2344	188.684	142.611	116.643
SRSF2	-0.415232	0.169972	-2.44294	0.0145681	0.0731943	false	2354.19	1793.2	1264.72	2067.58	832.007	1463.42	3232.67	1133.08	1075	1049.59	1253.97	1156.35	913.792	1036.88	1307.97	1765.39	1447.52	1714.56	2322.73	968.111	4823.91	1445.64	689.558	926.749
STAG2	-0.245625	0.244795	-1.00339	0.315673	0.517721	false	728.642	904.251	1890.1	1260.35	988.494	1984.91	584.253	2026.53	1237.8	2006.21	1285.48	1516.56	2117.7	1904.42	918.475	1309.6	1698.16	1237.56	2567.5	1987.22	411.631	1517.92	1538.74	1579.47
STAT1	-0.0590386	0.549683	-0.107405	0.914468	0.963039	false	146.655	1289.6	961.053	520.681	1380.2	206.965	548.664	4316.01	1275.57	3472.14	291.018	539.384	2649.59	500.465	1336.9	1737.69	974.006	785.36	2102.78	1110.92	159.89	1629.63	455.384	2148.3
STAT3	-0.285334	0.238718	-1.19528	0.231978	0.427857	false	5721.07	4386.31	3001.34	2371.6	4261.12	2978.18	4813.41	4641.87	3671.45	4489.14	4616.44	5839.94	1463.71	2823.04	4087.16	5980.64	5005.66	3831.73	4789.23	4435.32	2204.44	3527.74	3139.07	2918.46
STAT4	0.775349	0.373272	2.07717	0.0377857	0.140214	false	217.666	187.806	59.0912	121.143	101.085	77.4082	88.9725	139.249	115.808	102.496	124.192	80.3534	433.539	100.282	177.703	59.3475	50.7625	104.99	74.4574	106.641	364.004	91.9953	118.303	120.637
STK11	-0.337212	0.20521	-1.64325	0.100332	0.27793	false	152.829	349.18	254.42	245.78	236.189	380.523	495.28	301.117	335.675	280.472	308.627	268.768	293.397	331.121	252.09	251.633	388.65	367.052	534.039	293.957	476.267	208.397	234.984	283.617
STMN1	-1.04728	0.291655	-3.59082	0.000329646	0.00627194	true	1480.44	1974.05	3875.4	3147.38	2415.35	3007.51	3855.48	1698.55	4430.91	1428.58	2487.56	1840.74	3034.77	1430.44	1396.83	6861.36	5698.89	3868.1	4199.57	5081.66	5300.18	2506.4	2418.72	4670.5
SUV39H2	-0.743839	0.236235	-3.14873	0.00163984	0.0171827	false	125.042	191.98	220.771	412.351	199.254	356.078	272.849	230.432	306.304	229.622	299.359	277.081	198.33	157.992	166.338	466.867	267.296	415.827	484.401	406.162	214.32	163.339	325.737	226.095
SYK	-0.0685607	0.441354	-0.155342	0.876552	0.937564	false	387.477	824.956	2347.23	739.669	614.285	975.344	388.513	1571.32	688.134	2196.9	202.971	1259.79	459.765	242.191	923.641	933.734	1484.01	862.243	830.157	1458.66	170.095	1750.73	318.444	815.699
TBL1XR1	-0.68477	0.250138	-2.73757	0.00618947	0.041055	false	3005.65	3808.99	3896.74	4142.15	4256.26	6726.37	2885.67	7316.57	4712.04	5919.31	6289.33	9206.47	5658.96	6295.08	3725.56	16338	7447.02	4837.82	7527.9	9926.85	928.721	6317.64	2876.53	5023.62
TCF3	0.208657	0.2669	0.78178	0.434344	0.630485	false	439.964	484.122	595.836	854.988	618.173	730.897	385.548	980.397	1007.03	596.699	964.808	677.924	590.072	873.213	564.103	382.989	833.616	998.647	419.358	645.407	176.899	519.116	1279.45	409.847
TCF7L1	0.548989	0.457562	1.19981	0.230212	0.427857	false	390.564	226.758	325.822	186.373	98.169	609.488	210.568	55.8409	255.952	69.9194	253.019	141.311	113.097	507.088	138.443	269.833	69.0053	184.353	140.356	86.2398	710.999	104.199	384.888	98.2674
TET2	-0.464703	0.274997	-1.68985	0.0910565	0.261245	false	1253.51	952.942	1185.11	915.559	525.836	719.489	863.033	1270.2	811.495	630.069	1182.61	729.646	1126.87	978.225	722.175	1526.42	1051.74	664.663	1335.1	2236.67	316.378	852.364	1743.75	987.468
TFDP1	-0.600745	0.300736	-1.99758	0.0457618	0.159835	false	662.261	845.823	1016.86	653.472	1907.98	1280.9	447.828	1265.26	554.703	1961.72	766.471	920.832	687.598	831.586	1045.55	909.995	1556.98	1626.11	2167.82	1503.17	428.641	1667.18	657.956	909.173
TGFB1	0.0159882	0.274726	0.0581969	0.953592	0.983519	false	4793.29	2708.58	2187.19	3640.11	1643.6	2805.44	3834.71	1653.32	2671.14	2114.27	3256.81	1814.88	1629.26	4444.59	1870.01	2060.54	1669.61	2978.58	4975.81	926.382	7038.55	3260.2	960.195	1493.19
TGFB2	0.78158	0.567559	1.37709	0.168484	0.366909	false	174.442	459.081	39.3941	55.912	311.031	51.3339	65.2465	116.63	439.735	135.866	429.113	160.707	928.544	75.6847	78.5198	132.938	281.573	80.1894	39.3683	273.556	112.263	138.932	504.811	172.567
TGFB3	0.354869	0.546697	0.649115	0.516264	0.713878	false	835.159	203.109	676.266	143.275	359.629	180.891	80.0753	388.059	319.731	396.475	220.581	206.887	505.659	874.159	348.173	188.329	103.111	309.184	53.9174	976.457	166.694	79.7918	734.124	261.247
TGFBR2	0.996676	0.328321	3.03568	0.00239994	0.0210927	false	450.77	854.17	612.25	269.077	846.586	749.638	136.425	677.16	1025.49	880.349	1175.19	839.555	1435.02	1249.74	1563.16	393.276	671.017	463.776	379.133	384.833	364.004	661.803	1439.08	651.121
THBS1	1.40593	0.47015	2.99039	0.00278624	0.0236994	true	682.33	1257.61	2891.36	564.944	2903.28	796.897	3745.74	1072.29	8091.45	1086.13	1200.22	3512.46	6062.99	3209.98	2009.49	1349.96	1528.43	887.043	272.154	1314	2585.45	2683.82	4006.89	3020.72
THBS4	-2.379	0.705573	-3.37173	0.000746963	0.0101897	true	20.0685	6.95578	18.0556	40.7692	21.3834	8.14824	23.726	10.6027	26.854	34.9597	35.2187	40.6385	22.1277	26.4897	165.305	641.744	15.8633	191.793	14.5491	25.9647	20.4115	42.2427	119.923	24.7666
THEM4	0.414929	0.221316	1.87482	0.0608169	0.197744	false	273.241	264.32	168.246	163.077	180.787	275.41	189.808	273.55	313.856	291.596	321.603	239.213	257.337	152.316	335.775	270.625	168.151	188.486	127.519	194.735	156.488	117.341	252.001	253.258
TIAM1	-0.149003	0.282126	-0.528144	0.597399	0.771895	false	365.865	555.071	581.063	313.34	843.67	336.522	762.198	736.535	516.101	765.141	825.787	994.72	367.976	420.05	391.566	577.649	623.427	636.555	456.158	1422.49	187.105	1218.47	1100.38	672.692
TLR2	0.751287	0.50589	1.48508	0.137523	0.322597	false	364.321	318.575	158.397	215.494	1038.06	160.52	569.424	536.497	431.343	593.521	277.116	389.76	591.711	2174.04	840.988	334.72	157.84	202.54	822.454	195.662	180.301	135.177	220.399	570.43
TLR4	1.01737	0.40259	2.52707	0.0115017	0.0639671	false	202.229	218.411	77.1468	166.571	157.459	85.5565	86.0068	526.601	126.717	230.416	190.923	207.811	144.24	222.324	647.788	92.5821	72.1779	123.178	95.8532	153.006	170.095	137.054	243.087	124.632
TMPRSS2	-0.843248	0.916251	-0.920324	0.357403	0.553563	false	18.5248	15.3027	27.0835	156.088	19.4394	13.0372	750.335	588.097	13.427	259.02	13.9021	232.748	11.4736	6.62241	152.907	503.267	4.75899	90.1097	40.2241	446.963	30.6172	12.2035	21.0676	10.386
TNC	-0.158917	0.489294	-0.324788	0.745342	0.865025	false	274.784	934.857	810.042	447.296	732.866	479.931	284.712	156.213	790.515	212.142	538.476	444.253	562.208	270.573	39.2599	257.964	1754.48	470.389	146.347	274.484	326.583	367.042	303.049	478.554
TNF	-0.33985	0.530415	-0.640724	0.521702	0.717092	false	20.0685	282.405	13.9521	30.2857	129.272	30.9633	47.452	176.712	185.461	175.593	198.337	59.1106	81.9545	87.9835	122.945	53.0171	222.879	144.672	217.381	87.1671	20.4115	49.7526	142.611	75.8976
TNFAIP3	0.10899	0.41637	0.261763	0.793504	0.880107	false	1116.12	7228.45	1005.37	865.471	1401.58	1383.57	4353.72	2216.67	2891.84	2386.79	2832.33	1000.26	1044.92	2259.19	2139.66	861.726	2351.73	2096.5	3510.62	1021.9	3867.97	2464.16	939.127	2170.67
TNFRSF10A	-0.422326	0.352359	-1.19857	0.230696	0.427857	false	91.0802	168.33	176.453	191.033	120.524	431.042	228.363	188.021	141.823	127.921	98.2418	206.887	140.962	108.797	112.614	224.729	338.681	191.793	191.706	184.535	197.311	277.863	38.0837	203.725
TNFRSF10B	-0.467872	0.390996	-1.19662	0.231457	0.427857	false	364.321	292.143	306.125	184.044	203.142	769.193	166.082	197.917	161.124	139.839	203.898	278.004	240.946	200.565	146.708	197.034	713.055	375.319	232.786	225.336	265.349	241.253	49.4278	231.687
TNFRSF10C	1.69257	0.724106	2.33746	0.0194155	0.0905637	true	94.1677	52.8639	50.8841	11.6483	23.3273	198.002	17.7945	750.672	25.1756	52.4396	182.581	54.4926	18.03	68.1163	157.04	50.6432	81.6959	19.014	27.3866	22.2554	44.2248	15.9584	209.055	58.3213
TNFRSF10D	0.124876	0.430487	0.29008	0.771755	0.874317	false	104.974	83.4694	204.357	74.5494	147.74	166.224	97.8698	178.125	165.32	112.03	485.648	329.726	40.9772	386.938	121.912	83.8778	369.615	132.271	127.519	162.279	129.273	81.6693	75.3571	171.768
TNFSF10	-1.25442	0.468611	-2.67688	0.00743109	0.0471287	true	15460.5	7964.37	6802.05	2839.86	11921.2	1620.68	5848.46	5292.87	19312.2	16531.2	6331.03	5645.06	10244.3	12323.4	4516.95	28800.1	8530.48	4723.73	29187.3	38595.6	1843.84	5940.27	4478.48	3817.25
TNN	0.400469	0.468996	0.853886	0.393168	0.588083	false	29.3309	23.6497	22.1592	23.2967	37.9069	17.9261	20.7603	10.6027	14.2662	25.4252	25.0238	16.6248	18.8495	17.9751	22.7294	10.2869	14.277	16.5339	16.2608	28.7466	23.8134	10.326	248.759	23.1687
TNR	0.281538	0.288062	0.977351	0.328395	0.529977	false	13.8936	16.6939	12.3107	29.1208	20.4114	15.4816	62.2808	25.4465	26.854	19.8635	14.8289	20.3193	18.03	20.8133	54.7572	13.4521	17.4496	20.6674	20.54	19.4735	51.0286	24.4069	25.119	23.9677
TP53	-0.897852	0.476903	-1.88267	0.0597448	0.196272	false	83.3615	834.694	1540.47	514.856	1352.01	780.601	186.842	922.435	171.194	1495.32	302.14	1144.34	1553.04	672.648	739.739	3190.52	1901.21	1048.25	710.34	2205.14	122.469	112.647	1749.42	1059.37
TRAF7	0.0492768	0.266235	0.185088	0.85316	0.919277	false	2615.08	2691.89	2109.23	1465.36	1462.82	3335.07	2049.33	2457	1864.68	1622.45	2395.8	1371.55	1462.89	2331.09	1052.79	1208.31	1955.94	2662.78	1704.82	1676.58	3565.2	2687.58	937.507	975.484
TSC1	-0.589102	0.285469	-2.06363	0.0390532	0.143896	false	648.368	333.877	444.005	437.977	321.722	362.596	157.185	282.739	398.614	377.406	202.971	471.037	428.622	401.129	255.189	521.467	1112.02	423.268	362.873	298.594	523.894	412.101	279.55	401.858
TSHR	0.328899	0.65317	0.503543	0.614583	0.782322	false	10.8061	15.3027	11.49	10.4835	11.6636	8.96306	20.7603	14.8438	19.3013	7.94539	12.9753	16.6248	9.01499	13.2448	34.0941	7.1217	20.6223	9.92034	13.6933	12.9823	17.0095	9.38727	926.163	13.5817
TSLP	-0.73672	0.62117	-1.18602	0.235614	0.432357	false	30.8746	11.1292	14.7728	18.6373	190.506	13.0372	56.3493	21.2054	159.446	49.2614	145.509	50.7982	277.826	108.797	22.7294	122.651	114.216	16.5339	149.771	261.501	37.421	25.3456	22.6882	92.6749
TSPAN7	0.392811	0.71439	0.549854	0.582419	0.763166	false	100.343	139.116	1420.65	1139.21	49.5705	59.4821	80.0753	1144.39	318.892	1747.99	584.817	195.804	388.464	60.5478	269.653	423.345	191.153	410.867	26.5308	1417.86	61.2344	340.758	339.512	177.361
TTK	-0.864861	0.284988	-3.03473	0.00240749	0.0210927	false	395.195	632.976	959.411	938.856	657.052	565.488	800.753	773.291	848.419	778.648	551.451	530.148	342.57	279.087	323.378	1378.44	956.556	985.42	1088.62	1377.98	588.53	923.708	299.808	960.304
U2AF1	-0.35126	0.195291	-1.79865	0.0720748	0.224501	false	3122.97	6770.76	3816.31	4021.01	4577.01	4263.97	4433.8	5036.29	7175.9	4814.11	6771.27	4379.72	3601.9	2999.01	3785.48	6643.75	4620.98	6018.34	5993.39	6284.38	4476.91	3316.52	3074.24	3759.73
UBB	0.0412639	0.220962	0.186746	0.851859	0.919245	false	6408.03	13504	7589.11	10624.4	7437.52	6311.62	6922.06	8251.73	8884.49	11113.2	9890.91	8715.12	20576.3	10586.4	10417.3	10236.3	9024.62	7541.94	9880.58	11877.9	8742.91	7656.26	9870.97	9413.7
UBE2T	-0.787306	0.324484	-2.42633	0.0152523	0.0755301	false	100.343	255.973	614.713	446.131	436.415	662.452	311.404	371.095	582.397	717.469	362.382	290.011	512.215	137.179	312.013	1110.19	779.68	579.513	507.508	771.522	241.536	502.219	163.679	545.664
VEGFA	-0.590039	0.434665	-1.35746	0.174637	0.37578	false	14768.9	2981.25	3624.26	3412.96	2574.75	6525.11	6148	1070.87	4230.35	2136.52	7510.86	1920.17	2149.67	3614.89	813.093	5379.26	2942.64	3885.47	13699.3	3091.65	6674.55	4410.14	1853.95	2666.8
VEGFC	1.48541	0.699788	2.12266	0.0337827	0.132744	false	183.704	664.973	740.281	65.2307	210.918	524.746	195.74	87.649	1486.2	247.896	595.938	207.811	3439.63	640.482	121.912	85.4604	869.308	254.622	11.1258	81.6032	391.22	291.005	164.489	1207.17
VHL	0.0163318	0.207621	0.0786615	0.937302	0.973824	false	410.633	360.309	562.187	469.428	427.667	775.712	323.267	685.642	558.899	603.85	636.718	693.626	400.757	561.013	550.672	623.544	527.454	473.696	697.503	412.653	265.349	435.57	928.594	511.31
WEE1	-1.53117	0.390018	-3.92589	8.64e-05	0.00201533	false	544.937	1345.25	1733.34	1854.42	1413.25	2090.02	696.951	938.693	980.172	669.002	479.16	734.264	905.597	1025.53	394.665	4486.67	2217.69	1658.35	5637.36	1583.84	374.21	1449.4	1123.87	2351.23
WHSC1	-0.465439	0.252097	-1.84627	0.0648527	0.206615	false	1085.24	820.782	808.4	637.164	569.575	1219.79	744.403	446.021	817.369	355.159	933.297	373.136	594.17	692.515	694.28	1207.52	677.362	1063.96	840.427	822.524	1935.69	527.565	435.937	863.635
WHSC1L1	-0.107186	0.257021	-0.417032	0.676655	0.827135	true	929.327	396.479	1163.77	1345.38	517.088	1292.31	1035.05	1075.82	866.881	1443.68	592.231	853.409	967.882	684.001	1163.33	1102.28	1365.04	945.739	546.021	1340.89	588.53	742.533	723.59	945.125
WIF1	2.72256	0.916224	2.9715	0.00296352	0.0246279	false	33.9621	19.4762	827.277	2010.5	22.3553	32.5929	62.2808	35.3424	26.0148	21.4526	15.7558	46.1801	33.6013	40.6805	33.061	23.739	26.9676	28.1076	20.54	25.9647	68.0382	35.6716	81.8394	32.7558
WNT10A	0.793033	0.595989	1.33062	0.183315	0.385282	false	175.985	516.119	995.522	100.176	163.291	756.156	471.554	97.5449	240.847	234.389	746.081	99.7491	372.893	333.013	70.2545	34.8172	531.42	379.453	56.4849	225.336	51.0286	514.423	97.2349	67.1094
WNT10B	0.438484	0.40565	1.08094	0.279723	0.481523	true	35.5058	16.6939	44.3184	16.3077	44.7106	10.5927	35.589	9.89586	13.427	23.8362	47.2673	12.9304	26.2254	12.2988	29.9615	13.4521	24.5881	23.9741	4.27916	32.4558	17.0095	17.8358	47.8072	31.158
WNT11	2.11963	0.625027	3.39127	0.000695701	0.0100598	false	191.423	50.0816	96.0232	10.4835	219.665	17.1113	44.4863	25.4465	327.283	55.6177	192.776	60.9578	13.1127	35.9502	21.6963	15.0347	30.9334	23.1475	27.3866	12.055	37.421	122.973	128.026	74.2997
WNT2	0.506879	0.323434	1.56718	0.117073	0.292884	false	57.1181	69.5578	60.7326	73.3845	201.198	128.742	160.151	94.7175	64.6175	172.415	44.4868	183.797	90.1499	90.8217	135.343	79.13	114.216	76.8826	74.4574	53.784	91.8516	147.38	254.431	166.975
WNT2B	-0.0458545	0.417233	-0.109901	0.912488	0.963039	false	194.51	151.636	200.253	350.615	124.412	199.632	210.568	374.629	372.6	120.77	75.9984	338.962	122.112	75.6847	77.4866	386.154	290.298	213.287	58.1966	107.568	112.263	88.2404	121.544	176.562
WNT3	-0.425058	0.518442	-0.819875	0.412287	0.607019	false	27.7872	91.8163	73.0433	30.2857	54.4304	280.299	71.178	30.3944	75.5269	56.4123	379.992	47.1037	68.8418	50.1411	44.4257	75.9648	317.266	155.419	73.6015	57.4932	27.2153	56.3236	42.1351	33.5547
WNT4	-0.215102	0.759729	-0.28313	0.777077	0.874317	false	453.857	379.786	380.81	24.4615	38.8788	1679.35	145.322	185.194	164.481	301.925	778.52	98.8255	37.6991	270.573	82.6524	41.1476	815.373	902.751	232.786	193.808	44.2248	1060.76	107.769	101.463
WNT5A	0.0292465	0.457053	0.0639893	0.948979	0.981562	false	1253.51	1932.32	3267.25	2654.66	3190.98	1290.68	1385.01	1952.31	1993.07	4132.4	1704.4	2180.63	1453.87	1455.04	774.866	6545.63	1601.4	1384.71	194.274	1320.49	673.578	766.94	3152.84	1587.46
WNT5B	0.769787	0.57044	1.34946	0.177188	0.379015	false	52.4869	125.204	34.4699	25.6263	75.8137	19.5558	38.5548	38.8766	324.766	154.141	102.876	84.0479	113.917	254.49	101.249	79.9213	27.7607	24.8008	11.9816	194.735	61.2344	27.2231	68.8748	111.849
WNT7A	0.882258	0.495054	1.78215	0.0747254	0.22876	false	38.5933	278.231	147.728	26.7912	55.4023	72.5193	103.801	43.8245	182.943	47.6723	60.2426	29.5553	75.3981	70.9544	29.9615	18.1999	32.5197	85.9763	65.899	21.3281	173.497	63.8335	36.4631	39.9461
WNT7B	0.355178	0.375256	0.946495	0.343896	0.542557	false	267.066	495.252	215.026	343.626	94.2811	127.112	216.5	329.391	171.194	92.9611	202.971	135.77	155.714	219.486	67.1551	103.66	157.047	194.273	199.409	124.259	108.861	266.599	177.454	60.7181
XPA	0.538805	0.345544	1.55929	0.118927	0.295478	false	236.191	233.714	535.924	947.01	390.732	457.931	243.192	1186.09	219.028	653.906	329.944	744.424	342.57	299.901	407.063	283.285	365.649	324.064	330.351	506.311	115.665	487.2	401.094	385.879
XRCC4	-0.409397	0.257716	-1.58856	0.11216	0.288975	false	165.179	186.415	234.723	220.154	290.619	272.966	266.918	196.504	216.511	174.004	144.582	374.983	416.329	187.32	180.802	216.816	317.266	310.011	454.447	303.23	210.918	740.656	262.534	316.373
ZAK	0.152937	0.334847	0.456739	0.647859	0.806199	false	142.023	329.704	533.462	195.692	932.12	532.895	501.212	219.829	392.74	464.011	376.285	634.515	520.411	397.345	297.549	337.885	500.487	359.612	415.078	382.979	520.492	560.42	140.18	885.206
ZBTB16	0.880558	0.897135	0.981523	0.326335	0.529014	false	35.5058	13.9116	20.5178	10.4835	163.291	16.2965	26.6918	14.1369	9.23107	7.15085	25.0238	181.026	12.2932	254.49	664.319	91.7908	10.3111	14.0538	111.258	38.0197	20.4115	9.38727	158.007	71.903
ZBTB32	0.204643	0.446646	0.458177	0.646826	0.806199	false	24.6997	38.9524	9.84853	20.967	8.74774	10.5927	20.7603	22.6191	17.623	11.1235	18.5362	7.38882	18.8495	12.2988	53.7241	5.5391	43.624	12.4004	7.70249	9.2731	51.0286	28.1618	18.6367	55.1256
ZIC2	-0.00490926	0.572492	-0.00857525	0.993158	0.995913	false	40.137	54.2551	240.468	302.857	69.9819	136.076	20.7603	270.016	38.6027	230.416	15.7558	62.805	106.541	97.4441	121.912	38.7737	103.111	114.084	312.379	38.0197	23.8134	48.8138	23.4984	42.3429
