# Supplementary material for: Transcriptome Analysis in Vulvar Squamous Cell Cancer
Source: Cancers (Basel). 2021 Dec 19;13(24):6372. doi: 10.3390/cancers13246372 (PMC8699756; doi:10.3390/cancers13246372)
Supplement: Supplementary file 1 [file cancers-13-06372-s001.zip › S4 other_group_final.xlsx]

## Sheet: OTHER vs TP53
geneSymbol	baseMean	log2FoldChange	lfcSE	stat	pvalue	padj	|log2FC|>=1 AND FDR <= 0.1
SMC1B	65.5756	2.56309	0.509248	5.03309	4.82624e-07	0.000378378	true
CDC7	310.399	1.18822	0.302137	3.9327	8.39972e-05	0.0219513	true
DNMT3A	380.484	-1.12872	0.28167	-4.00725	6.14304e-05	0.0219513	true
ITGB8	2631.91	-1.49767	0.42953	-3.48677	0.000488887	0.0958219	true
SMO	197.764	-1.8094	0.554968	-3.26037	0.00111268	0.14539	false
MCM4	1770.74	0.898453	0.274784	3.26967	0.00107672	0.14539	false
IKBKB	383.087	-0.770663	0.246801	-3.12261	0.00179255	0.200766	false
TMPRSS2	143.233	-3.54905	1.18315	-2.99967	0.00270273	0.211894	false
ARID2	542.605	-0.727428	0.242426	-3.00061	0.00269437	0.211894	false
XRCC4	277.511	0.956773	0.317907	3.0096	0.00261589	0.211894	false
IDH1	494.617	-1.23151	0.430175	-2.86282	0.00419895	0.274331	false
DTX3	86.6803	-1.17904	0.411724	-2.86367	0.00418767	0.274331	false
E2F1	131.7	0.971222	0.36391	2.66885	0.0076111	0.280475	false
ITGA6	12145.5	1.58516	0.594419	2.66674	0.0076591	0.280475	false
GSK3B	542.306	-0.842902	0.313108	-2.69205	0.00710149	0.280475	false
TCF3	667.879	-0.738163	0.277758	-2.65758	0.00787046	0.280475	false
MMP7	598.984	-2.29868	0.814932	-2.8207	0.00479188	0.280475	false
BID	314.248	-0.869259	0.324621	-2.67776	0.00741156	0.280475	false
MECOM	138.838	-1.32986	0.481465	-2.76211	0.00574285	0.280475	false
HDAC10	294.253	-0.910156	0.341208	-2.66745	0.00764282	0.280475	false
POLR2J	150.45	-0.81558	0.29832	-2.73391	0.00625875	0.280475	false
MCM5	581.745	0.797012	0.296978	2.68375	0.00728023	0.280475	false
PIK3R2	555.368	-0.880721	0.335867	-2.62223	0.00873557	0.297769	false
HIST1H3G	3079.08	1.20939	0.465521	2.59793	0.00937864	0.306369	false
PRKX	278.974	-1.2972	0.523704	-2.47698	0.0132501	0.314717	false
LEP	28.9708	1.50195	0.599711	2.50446	0.0122637	0.314717	false
DTX4	101.423	-1.3027	0.508981	-2.55943	0.0104845	0.314717	false
CCND2	439.009	-1.91695	0.776778	-2.46783	0.0135936	0.314717	false
HOXA10	84.1776	-0.922251	0.373549	-2.46889	0.0135533	0.314717	false
ZAK	440.505	0.868317	0.348801	2.48943	0.0127946	0.314717	false
PLAT	1779.97	-1.79956	0.729634	-2.46639	0.0136484	0.314717	false
BMPR1B	181.122	1.60715	0.645706	2.48897	0.0128113	0.314717	false
ERCC2	223.366	0.674307	0.262052	2.57318	0.010077	0.314717	false
MPL	15.399	0.741141	0.292602	2.53294	0.0113112	0.314717	false
MED12	437.073	-0.677845	0.278546	-2.43351	0.0149533	0.333073	false
MAPK8IP2	59.2788	-1.44891	0.597404	-2.42534	0.0152942	0.333073	false
HIST1H3H	6588.81	0.911511	0.378757	2.40659	0.0161024	0.341196	false
PPARG	51.6383	-1.60995	0.683393	-2.35582	0.0184821	0.379914	false
MAP3K12	121.959	-0.991717	0.422453	-2.34752	0.0188988	0.379914	false
ACVR1B	185.038	-0.681699	0.296119	-2.30211	0.0213291	0.417507	false
POLR2D	705.617	0.533675	0.232716	2.29324	0.0218339	0.417507	false
MEN1	876.68	-0.978189	0.440586	-2.2202	0.0264051	0.422363	false
FZD9	22.1364	0.862415	0.400393	2.15392	0.0312462	0.422363	false
IGFBP3	6045.05	1.623	0.738354	2.19814	0.0279394	0.422363	false
ATR	659.62	-0.563272	0.261253	-2.15604	0.0310804	0.422363	false
FOXO4	212.506	-1.24357	0.570953	-2.17805	0.029402	0.422363	false
PLCB1	69.9995	-1.00701	0.464865	-2.16624	0.0302929	0.422363	false
CDC6	609.791	0.840998	0.37706	2.23041	0.0257204	0.422363	false
MYB	47.5361	-1.03226	0.477231	-2.16301	0.0305405	0.422363	false
SPP1	4247.58	-1.67859	0.753914	-2.2265	0.0259808	0.422363	false
NTHL1	170.411	-0.637986	0.288013	-2.21513	0.0267511	0.422363	false
MAML2	294.806	0.909656	0.415433	2.18966	0.0285489	0.422363	false
WIF1	150.173	-2.55016	1.16736	-2.18456	0.0289209	0.422363	false
PBX3	355.291	-0.797158	0.356333	-2.23711	0.0252789	0.422363	false
GPC4	214.063	-2.06429	0.913121	-2.2607	0.0237778	0.422363	false
ZIC2	106.369	-1.62909	0.740159	-2.201	0.0277359	0.422363	false
NTRK2	1437.21	-2.89713	1.31688	-2.19999	0.0278079	0.422363	false
CCNB1	2254.07	0.805874	0.369801	2.17921	0.0293162	0.422363	false
BNIP3	2447.46	1.16572	0.543213	2.14597	0.0318754	0.423565	false
PRKDC	3182.26	0.677649	0.325547	2.08157	0.0373817	0.43099	false
CACNA2D1	191.047	-1.52628	0.721819	-2.11449	0.0344736	0.43099	false
APH1B	50.6373	-0.710271	0.338092	-2.10082	0.0356566	0.43099	false
ALKBH2	85.3253	0.786792	0.37595	2.09281	0.0363658	0.43099	false
CARD11	70.9798	-1.26442	0.606401	-2.08513	0.0370575	0.43099	false
RAD21	5373.1	0.607505	0.290354	2.09229	0.0364124	0.43099	false
LAMC3	51.6383	0.610907	0.291457	2.09604	0.0360785	0.43099	false
CDC25C	160.113	0.951933	0.449658	2.11702	0.0342584	0.43099	false
POLE2	188.972	0.613881	0.289913	2.11747	0.0342201	0.43099	false
RUNX1T1	146.708	-1.09742	0.532893	-2.05937	0.0394592	0.432968	false
STMN1	3254.56	0.750433	0.364959	2.05621	0.0397624	0.432968	false
PRKACB	233.725	-1.20748	0.583039	-2.07101	0.038358	0.432968	false
ZBTB32	22.0093	1.10993	0.539159	2.05863	0.0395293	0.432968	false
EGF	36.4184	-1.6559	0.809319	-2.04604	0.0407525	0.433767	false
HDAC5	473.049	-0.681593	0.333442	-2.04411	0.0409423	0.433767	false
TCL1B	8.32415	-0.935376	0.462069	-2.02432	0.0429372	0.448836	false
CCNE2	393.299	0.731874	0.363825	2.01161	0.0442613	0.456591	false
FANCC	460.686	0.715375	0.359909	1.98766	0.0468498	0.477016	false
IL11RA	46.2657	-0.561494	0.284738	-1.97196	0.0486137	0.48194	false
PAX3	15.0978	-1.02173	0.519726	-1.9659	0.0493102	0.48194	false
PIK3CA	818.864	-0.63972	0.324279	-1.97275	0.0485241	0.48194	false
RAC2	367.763	-1.13809	0.580144	-1.96174	0.0497923	0.48194	false
PBX1	391.851	-1.2443	0.646254	-1.92541	0.0541784	0.493905	false
CDC14A	119.281	-0.698915	0.359867	-1.94214	0.0521196	0.493905	false
NBN	1283.96	0.364681	0.188846	1.9311	0.0534702	0.493905	false
LFNG	219.302	-0.910528	0.469755	-1.9383	0.0525863	0.493905	false
AGK	246.157	-0.622996	0.322902	-1.92937	0.053685	0.493905	false
IL13	11.8064	0.594046	0.310226	1.91488	0.0555081	0.500211	false
TNFSF10	10773.8	-1.14457	0.601975	-1.90135	0.0572561	0.504368	false
IL6	174.237	1.45252	0.763355	1.90281	0.0570658	0.504368	false
KMT2D	634.472	-0.363699	0.194286	-1.87198	0.0612091	0.522169	false
PTTG2	1333.34	0.733212	0.390184	1.87914	0.0602247	0.522169	false
BMP4	110.288	-1.07527	0.574549	-1.87151	0.0612749	0.522169	false
FGFR3	2016.83	-1.03552	0.557874	-1.85618	0.0634273	0.523611	false
H3F3A	13808.2	-0.517832	0.278998	-1.85604	0.0634477	0.523611	false
CNOT4	522.062	-0.45387	0.243781	-1.86179	0.0626322	0.523611	false
SOST	21.0869	-1.27649	0.696669	-1.83228	0.0669092	0.535487	false
GRIN2B	9.02206	0.587764	0.320443	1.83422	0.0666208	0.535487	false
PDGFC	322.423	-0.710601	0.388839	-1.82749	0.0676257	0.535487	false
FZD3	113.937	-0.8981	0.493863	-1.81852	0.0689849	0.535487	false
ITGB6	2649.94	-1.21415	0.664272	-1.82779	0.0675804	0.535487	false
SMAD3	1006.68	-0.879045	0.482468	-1.82198	0.0684586	0.535487	false
CACNA1C	68.9271	-0.734413	0.406057	-1.80864	0.0705063	0.541931	false
CALML3	466.606	-1.00447	0.5584	-1.79883	0.0720461	0.543117	false
EP300	1159.83	-0.434667	0.24151	-1.79979	0.0718933	0.543117	false
MMP9	1587.42	-0.841614	0.47343	-1.77769	0.0754543	0.547742	false
CSF3	13.3061	0.577453	0.324664	1.77862	0.0753025	0.547742	false
KLF4	2178.06	1.15638	0.648434	1.78334	0.0745314	0.547742	false
COL6A6	20.984	-0.746064	0.417588	-1.7866	0.0740019	0.547742	false
PPARGC1A	80.4394	-0.988989	0.559064	-1.76901	0.0768926	0.548035	false
DLL3	38.1969	0.888255	0.502046	1.76927	0.0768491	0.548035	false
LAT	166.864	-1.02726	0.584527	-1.75743	0.0788448	0.551887	false
POLD1	48.2896	0.632816	0.362227	1.74701	0.080635	0.551887	false
SFN	44873.7	0.990153	0.565417	1.75119	0.0799132	0.551887	false
JAK3	135.222	-1.01673	0.582592	-1.74518	0.0809528	0.551887	false
LEF1	108.441	-0.881408	0.502069	-1.75555	0.079165	0.551887	false
MAP3K5	186.212	-0.641874	0.36952	-1.73705	0.0823789	0.556768	false
CASP12	19.7459	0.469878	0.277336	1.69425	0.0902171	0.558401	false
IL11	160.63	1.48741	0.866456	1.71666	0.0860412	0.558401	false
TGFB3	358.791	-1.12775	0.663718	-1.69913	0.0892939	0.558401	false
CDK2	400.893	0.513914	0.300993	1.70739	0.087749	0.558401	false
PBRM1	635.329	-0.426003	0.247231	-1.72309	0.0848714	0.558401	false
MAP2K6	74.8463	-1.02756	0.602258	-1.70617	0.0879755	0.558401	false
FZD7	409.456	-1.36606	0.796294	-1.71553	0.0862488	0.558401	false
BAD	788.774	-0.729146	0.430683	-1.693	0.0904553	0.558401	false
SMC3	1272.94	0.42155	0.248224	1.69826	0.0894583	0.558401	false
INHBB	171.71	-1.37979	0.812296	-1.69863	0.0893892	0.558401	false
COG7	469.128	-0.466249	0.272248	-1.71259	0.0867884	0.558401	false
GLI1	94.0485	-1.34626	0.797607	-1.68788	0.0914344	0.560036	false
SMAD2	1016.89	-0.660573	0.394423	-1.67478	0.0939766	0.571145	false
HELLS	703.404	0.568675	0.352436	1.61356	0.106623	0.574411	false
HDAC1	1692.42	-0.438525	0.263922	-1.66157	0.0965988	0.574411	false
BRCA2	335.652	0.486081	0.292831	1.65994	0.0969273	0.574411	false
BMP2	439.676	0.878679	0.534199	1.64485	0.1	0.574411	false
SP1	352.755	-0.357089	0.216642	-1.64829	0.099293	0.574411	false
SHC1	3631.05	-0.668521	0.413389	-1.61717	0.105841	0.574411	false
CDC25A	117.865	0.738793	0.458318	1.61197	0.106969	0.574411	false
BRAF	300.154	-0.518823	0.317829	-1.6324	0.102596	0.574411	false
EFNA1	654.247	-0.635481	0.388142	-1.63724	0.10158	0.574411	false
MCM7	2876.58	0.472896	0.291913	1.61999	0.105234	0.574411	false
SOS1	741.25	-0.325208	0.199915	-1.62673	0.103795	0.574411	false
PDGFB	36.2202	-0.572178	0.353381	-1.61915	0.105414	0.574411	false
MUTYH	71.7925	0.471802	0.28434	1.65929	0.0970578	0.574411	false
PCNA	659.897	0.621644	0.376376	1.65166	0.0986049	0.574411	false
IL15	58.2953	-1.06059	0.656406	-1.61575	0.106148	0.574411	false
FGF5	12.0494	-1.87717	1.16151	-1.61615	0.106062	0.574411	false
IL12RB2	170.769	1.03812	0.640684	1.62033	0.105161	0.574411	false
BCOR	208.888	-0.382249	0.23846	-1.60299	0.108937	0.57707	false
DNAJC14	154.088	-0.404536	0.252069	-1.60486	0.108525	0.57707	false
POLD4	1056.3	-0.614249	0.402645	-1.52553	0.127126	0.581128	false
TNFRSF10C	95.2412	-1.38511	0.902649	-1.5345	0.124907	0.581128	false
EPO	39.7959	-1.23899	0.848102	-1.4609	0.144044	0.581128	false
IL2RA	98.3363	-0.757994	0.524527	-1.4451	0.148429	0.581128	false
MFNG	80.4058	-0.739476	0.512957	-1.44159	0.149417	0.581128	false
TLR2	478.304	-0.942852	0.646624	-1.45811	0.144809	0.581128	false
CDKN1C	190.76	0.886084	0.566816	1.56327	0.11799	0.581128	false
BAIAP3	71.0864	-1.1418	0.727989	-1.56843	0.11678	0.581128	false
SMARCB1	1501.68	-0.365384	0.242223	-1.50846	0.131437	0.581128	false
SIX1	33.4542	-0.591588	0.41104	-1.43925	0.150081	0.581128	false
HSPB1	12625.4	-0.677549	0.46999	-1.44162	0.149409	0.581128	false
PLCE1	47.6631	-1.19356	0.766808	-1.55652	0.119584	0.581128	false
AMER1	162.313	-0.596951	0.404454	-1.47595	0.139959	0.581128	false
SOS2	432.281	-0.465704	0.303145	-1.53624	0.124479	0.581128	false
TNF	110.679	-1.00394	0.675148	-1.487	0.137015	0.581128	false
PIK3R1	646.9	-0.922479	0.595265	-1.54969	0.121215	0.581128	false
CHEK1	325.029	0.580908	0.382052	1.52049	0.128387	0.581128	false
THEM4	226.197	-0.438961	0.284356	-1.5437	0.122661	0.581128	false
IL8	5049.44	1.16159	0.76925	1.51003	0.131036	0.581128	false
MGMT	606.769	0.73648	0.513132	1.43526	0.151212	0.581128	false
CDKN2A	179.884	1.02364	0.645102	1.58679	0.112561	0.581128	false
WNT5A	1993.68	-0.823746	0.562378	-1.46476	0.142988	0.581128	false
FANCE	330.952	0.621149	0.429978	1.44461	0.148569	0.581128	false
LIFR	110.55	-1.00512	0.693037	-1.45031	0.146972	0.581128	false
SPRY2	217.179	-0.905888	0.622002	-1.45641	0.14528	0.581128	false
ITGA3	4072.72	-0.787893	0.548653	-1.43605	0.150988	0.581128	false
ERBB2	1277.62	-0.708232	0.444457	-1.59348	0.111053	0.581128	false
CASP8	732.496	-0.491894	0.320009	-1.53713	0.124262	0.581128	false
IRS1	341.348	-0.808746	0.517256	-1.56353	0.117928	0.581128	false
HOXA9	422.541	-0.933713	0.647463	-1.44211	0.149271	0.581128	false
APC	225.255	-0.407446	0.275497	-1.47895	0.139154	0.581128	false
PLD1	1009.67	-0.754718	0.495446	-1.52331	0.127681	0.581128	false
EGFR	4744.02	-0.973852	0.672136	-1.44889	0.147368	0.581128	false
FGFR2	188.874	-0.699726	0.479971	-1.45785	0.144882	0.581128	false
BDNF	65.9397	-0.951197	0.633248	-1.50209	0.133073	0.581128	false
SPRY4	158.425	-0.477213	0.325207	-1.46741	0.142263	0.581128	false
PKMYT1	360.912	0.621876	0.398408	1.5609	0.118547	0.581128	false
STAT3	3958.25	-0.45226	0.307853	-1.46908	0.141811	0.581128	false
ARID1B	833.675	-0.320182	0.218915	-1.46258	0.143582	0.581128	false
ACVR2A	275.449	-0.525143	0.348317	-1.50766	0.131642	0.581128	false
PTCH1	114.081	-1.03024	0.699794	-1.4722	0.140966	0.581128	false
SMAD4	773.671	-0.583814	0.367603	-1.58817	0.112249	0.581128	false
IL24	166.161	1.31864	0.871149	1.51368	0.130108	0.581128	false
PLA2G4F	102.39	-1.07273	0.73726	-1.45502	0.145663	0.581128	false
BIRC7	18.9031	-0.520212	0.346255	-1.5024	0.132995	0.581128	false
AXIN2	150.918	-0.730293	0.475196	-1.53682	0.124336	0.581128	false
PRKCA	137.038	-0.676627	0.458402	-1.47605	0.139929	0.581128	false
LAMC2	11492.7	1.09588	0.72911	1.50303	0.13283	0.581128	false
JUN	1306.94	0.676062	0.465265	1.45307	0.146205	0.581128	false
SKP1	5447.55	-0.509627	0.343498	-1.48364	0.137905	0.581128	false
FZD10	196.581	-0.89663	0.621516	-1.44265	0.149119	0.581128	false
RFC4	840.281	0.544203	0.366215	1.48602	0.137274	0.581128	false
PRKCB	101.68	-0.967265	0.62328	-1.55189	0.120688	0.581128	false
PRKAR2B	99.7799	-0.87873	0.59376	-1.47994	0.138889	0.581128	false
DUSP8	31.9547	-0.52619	0.348467	-1.51001	0.13104	0.581128	false
PIAS1	568.918	-0.346561	0.229201	-1.51204	0.130524	0.581128	false
RELA	704.232	-0.523977	0.365956	-1.4318	0.1522	0.582071	false
TTK	747.337	0.464201	0.325041	1.42813	0.153254	0.583259	false
BRCA1	366.403	0.454708	0.324371	1.40181	0.160971	0.589004	false
VEGFC	532.047	1.21837	0.861904	1.41358	0.157486	0.589004	false
IL2RB	87.9679	-0.853052	0.607797	-1.40351	0.160464	0.589004	false
NPM2	15.6335	-1.43045	1.01559	-1.40848	0.158988	0.589004	false
TLR4	187.578	-0.710965	0.505106	-1.40756	0.159263	0.589004	false
CSF3R	254.156	-1.09051	0.769645	-1.4169	0.156511	0.589004	false
BRIP1	344.54	0.530949	0.378259	1.40366	0.160419	0.589004	false
RASGRP1	154.216	-0.858595	0.614398	-1.39746	0.162277	0.589004	false
RPS6KA6	30.8032	-1.05969	0.748403	-1.41594	0.156794	0.589004	false
ASXL1	995.911	0.326733	0.23362	1.39856	0.161944	0.589004	false
GADD45A	1339.7	0.52222	0.376067	1.38864	0.164944	0.595926	false
CDKN2B	1710.01	1.14968	0.831252	1.38307	0.166643	0.599303	false
CACNA1G	31.2289	-0.699837	0.511283	-1.36879	0.171066	0.602643	false
RELN	19.2707	0.694597	0.509692	1.36278	0.172952	0.602643	false
IL19	38.366	-0.938044	0.687927	-1.36358	0.172699	0.602643	false
KMT2C	966.934	-0.452148	0.330963	-1.36616	0.171888	0.602643	false
AKT3	494.007	-0.720149	0.525588	-1.37018	0.170632	0.602643	false
IL22RA2	59.3876	-0.683046	0.496436	-1.3759	0.168853	0.602643	false
FLT1	320.114	-0.331491	0.242101	-1.36923	0.170928	0.602643	false
MAP3K14	386.702	-0.424996	0.313507	-1.35562	0.175221	0.607845	false
HSPA6	435.669	-0.881899	0.656828	-1.34267	0.17938	0.609913	false
ZBTB16	82.4796	-1.50642	1.12478	-1.3393	0.180473	0.609913	false
PRLR	55.0742	-0.979473	0.73232	-1.33749	0.181062	0.609913	false
MLLT3	119.646	-0.783145	0.581949	-1.34573	0.17839	0.609913	false
FGF14	37.1942	0.484649	0.362523	1.33688	0.181262	0.609913	false
MTOR	428.154	0.334003	0.248369	1.34478	0.178695	0.609913	false
IDH2	1762.65	-0.544071	0.404098	-1.34638	0.178179	0.609913	false
RET	70.9676	0.803456	0.60216	1.33429	0.182109	0.610142	false
CACNA1H	99.9923	0.367479	0.27641	1.32947	0.183693	0.612831	false
JAG2	1678.71	-0.676477	0.517467	-1.30729	0.191116	0.626	false
NUPR1	366.475	-0.80321	0.613644	-1.30892	0.190562	0.626	false
WT1	17.0259	0.506441	0.386727	1.30956	0.190345	0.626	false
RUNX1	234.876	-0.373047	0.285693	-1.30576	0.191633	0.626	false
SAP130	570.274	0.347211	0.265555	1.30749	0.191045	0.626	false
CACNA2D3	71.0843	-1.12562	0.866251	-1.29942	0.193801	0.62785	false
CSF2	65	1.16017	0.892624	1.29972	0.193695	0.62785	false
HES5	130.244	0.926233	0.714311	1.29668	0.194741	0.628301	false
GLI3	599.632	-0.550512	0.427485	-1.28779	0.197819	0.628385	false
CXXC4	20.6181	0.363681	0.282504	1.28735	0.197973	0.628385	false
RPS6KA5	446.379	0.3917	0.30354	1.29044	0.196898	0.628385	false
NTRK1	21.9631	-0.57434	0.444768	-1.29133	0.196591	0.628385	false
PRKAA2	50.4714	-1.01586	0.797274	-1.27417	0.202604	0.631456	false
HDAC11	159.467	-0.370949	0.291054	-1.2745	0.202485	0.631456	false
GNA11	938.228	-0.335404	0.262617	-1.27716	0.201545	0.631456	false
SPOP	66.7911	-0.318031	0.249801	-1.27314	0.202968	0.631456	false
VHL	537.335	-0.295497	0.232057	-1.27338	0.202882	0.631456	false
RASGRF1	17.4706	-0.692671	0.553313	-1.25186	0.21062	0.633315	false
CCNA2	1146.11	0.449691	0.355917	1.26347	0.20642	0.633315	false
RAD51	104.305	0.502794	0.399182	1.25956	0.207827	0.633315	false
TNFRSF10A	182.522	0.46642	0.371703	1.25482	0.209545	0.633315	false
FGF21	41.4811	0.305238	0.243942	1.25127	0.210836	0.633315	false
GTF2H3	812.959	0.332678	0.262441	1.26763	0.204929	0.633315	false
CDKN2C	439.597	0.485262	0.384395	1.2624	0.206804	0.633315	false
COL1A1	32924.8	-0.948463	0.756605	-1.25358	0.209996	0.633315	false
NOL7	1574.21	0.368166	0.294009	1.25223	0.210487	0.633315	false
ENDOG	385.075	0.532515	0.426549	1.24842	0.211875	0.634009	false
IL1R1	370.034	-0.501342	0.402705	-1.24494	0.213155	0.635412	false
RFC3	674.151	0.409052	0.329165	1.24269	0.21398	0.635457	false
WNT3	92.5271	-0.835532	0.676965	-1.23423	0.217116	0.639921	false
TCF7L1	234.606	-0.695511	0.563486	-1.2343	0.217091	0.639921	false
NF1	1094.32	-0.392844	0.319176	-1.23081	0.218395	0.641281	false
MYCN	63.4834	-0.572103	0.466827	-1.22551	0.220382	0.642302	false
HNF1A	29.6708	0.370114	0.301952	1.22574	0.220297	0.642302	false
FLT3	28.6389	-0.710523	0.582977	-1.21878	0.222926	0.647311	false
H2AFX	407.708	0.513322	0.422799	1.21411	0.224707	0.650075	false
MYD88	798.28	-0.559691	0.462568	-1.20997	0.226292	0.652254	false
NOTCH3	1774.35	-0.533392	0.442763	-1.20469	0.228322	0.652275	false
PLA2G2A	53.8479	-1.16389	0.966909	-1.20372	0.228699	0.652275	false
TSPAN7	461.984	-1.10277	0.916324	-1.20347	0.228795	0.652275	false
CYLD	1053.77	0.3451	0.288422	1.19651	0.231498	0.655214	false
WNT16	19.6301	-1.08279	0.90378	-1.19807	0.230888	0.655214	false
FGF11	465.281	-0.772901	0.669781	-1.15396	0.248516	0.664484	false
JAK2	527.82	-0.38132	0.331022	-1.15195	0.249343	0.664484	false
NCOR1	1550.38	-0.390352	0.335957	-1.16191	0.245272	0.664484	false
BMP8A	87.1484	-0.582242	0.49552	-1.17501	0.23999	0.664484	false
WNT7B	188.574	-0.562664	0.484157	-1.16215	0.245174	0.664484	false
CIC	565.293	-0.341615	0.288621	-1.18361	0.236568	0.664484	false
IL20RA	93.99	-0.945631	0.825035	-1.14617	0.251724	0.664484	false
FGF12	64.6469	-0.850115	0.730783	-1.16329	0.244711	0.664484	false
CDKN1A	2187.55	0.483587	0.414292	1.16726	0.243104	0.664484	false
HMGA1	960.297	-0.527988	0.447231	-1.18057	0.237773	0.664484	false
PIK3CB	285.179	-0.320771	0.279225	-1.14879	0.250643	0.664484	false
POLR2H	829.507	-0.264177	0.226153	-1.16813	0.242753	0.664484	false
SMAD9	87.5561	-0.69438	0.602613	-1.15228	0.249206	0.664484	false
FGFR4	29.5877	0.513369	0.447479	1.14725	0.251279	0.664484	false
BAP1	649.415	-0.316785	0.276179	-1.14703	0.251371	0.664484	false
DUSP4	99.1733	-0.542464	0.46038	-1.1783	0.238679	0.664484	false
PPP3CB	302.814	-0.397037	0.339433	-1.16971	0.242119	0.664484	false
TRIM39	161.049	-0.289105	0.244533	-1.18227	0.237098	0.664484	false
ERCC3	194.067	0.245311	0.212658	1.15355	0.248686	0.664484	false
FCF1	1348.77	-0.34285	0.291803	-1.17494	0.24002	0.664484	false
BMP5	30.2033	0.341986	0.298973	1.14387	0.252677	0.664762	false
PRMT8	39.2732	0.892922	0.786911	1.13472	0.256493	0.672545	false
NOTCH2	1234.81	-0.412511	0.364728	-1.13101	0.25805	0.674371	false
CD14	603.118	-0.577847	0.520668	-1.10982	0.267077	0.682048	false
ARID1A	606.244	-0.280871	0.253078	-1.10982	0.267077	0.682048	false
WNT2B	189.333	-0.599613	0.538324	-1.11385	0.265343	0.682048	false
SF3B1	2152.11	0.232075	0.208018	1.11565	0.264572	0.682048	false
GRIA3	194.472	-0.761904	0.685293	-1.11179	0.266227	0.682048	false
RNF43	90.3637	-0.504088	0.449465	-1.12153	0.262063	0.682048	false
MAD2L2	542.982	0.368009	0.329338	1.11742	0.263815	0.682048	false
MNAT1	443.023	-0.356113	0.324349	-1.09793	0.272234	0.69296	false
IFNA17	19.3929	0.296592	0.27241	1.08877	0.276256	0.699166	false
ARNT2	54.8666	-0.553936	0.508984	-1.08832	0.276456	0.699166	false
BAX	1018.16	0.259362	0.239213	1.08423	0.278262	0.701472	false
CBLC	168.32	0.601335	0.556264	1.08102	0.279686	0.702802	false
HDAC6	330.64	-0.278557	0.259239	-1.07452	0.28259	0.702929	false
CACNA2D4	12.5818	0.323227	0.300247	1.07654	0.281687	0.702929	false
IL12B	17.7125	0.386691	0.358983	1.07719	0.281397	0.702929	false
HES1	652.402	0.401804	0.374509	1.07288	0.283323	0.702929	false
KDM6A	415.953	-0.407235	0.383269	-1.06253	0.287995	0.712265	false
DTX1	24.6588	-0.483351	0.458193	-1.05491	0.291467	0.718585	false
LAMA3	4409.34	-0.778886	0.750646	-1.03762	0.299446	0.724469	false
TET2	1024.22	-0.33326	0.321594	-1.03627	0.300074	0.724469	false
ATM	98.0718	-0.360429	0.350185	-1.02925	0.303361	0.724469	false
IFNA7	5.21718	0.418112	0.407203	1.02679	0.304519	0.724469	false
LEPR	205.56	-0.522075	0.500054	-1.04404	0.296468	0.724469	false
CACNA1E	30.9879	0.337802	0.325823	1.03677	0.299844	0.724469	false
XPA	434.463	-0.462588	0.445524	-1.0383	0.29913	0.724469	false
U2AF1	4739.91	-0.255172	0.249207	-1.02393	0.305866	0.724469	false
MAP3K13	175.257	-0.472911	0.457668	-1.03331	0.301461	0.724469	false
PTEN	1520.23	-0.279294	0.271443	-1.02892	0.303516	0.724469	false
COL1A2	10709.2	-0.727226	0.70989	-1.02442	0.305637	0.724469	false
HDAC3	515.756	0.297663	0.290416	1.02495	0.305386	0.724469	false
TTC31	297.866	-0.350457	0.336423	-1.04171	0.297544	0.724469	false
SOX9	1222.58	-0.606837	0.599565	-1.01213	0.311476	0.725264	false
IGF1R	2836.78	-0.506679	0.498708	-1.01598	0.309637	0.725264	false
WNT2	111.931	0.411345	0.405514	1.01438	0.310402	0.725264	false
ATRX	851.324	-0.294981	0.289389	-1.01932	0.30805	0.725264	false
THBS1	2363.98	0.616566	0.607009	1.01574	0.309751	0.725264	false
NEG	11.0337	-0.37853	0.374207	-1.01155	0.311752	0.725264	false
TLK2	810.416	-0.245078	0.244541	-1.0022	0.316248	0.733545	false
KRAS	1242.8	-0.590637	0.59089	-0.999571	0.317518	0.734319	false
CDC14B	105.483	0.486846	0.494357	0.984805	0.32472	0.743518	false
JAG1	3902.08	0.578385	0.586575	0.986038	0.324115	0.743518	false
LIF	93.7957	-0.504551	0.516648	-0.976586	0.328774	0.743518	false
CDKN2D	186.434	0.405362	0.411299	0.985563	0.324347	0.743518	false
MAPK10	94.8843	-0.822298	0.838646	-0.980507	0.326836	0.743518	false
MAPK8IP1	78.9165	0.324582	0.33103	0.980523	0.326828	0.743518	false
PAX8	34.6969	0.426577	0.437941	0.974052	0.330031	0.743518	false
PLAU	4068.45	-0.5555	0.570248	-0.974138	0.329988	0.743518	false
POS	69.8304	-0.26888	0.275488	-0.976015	0.329057	0.743518	false
PRKAR2A	927.029	-0.224161	0.230796	-0.97125	0.331424	0.744516	false
NEG	25.6266	-0.354545	0.369487	-0.95956	0.337277	0.7555	false
CCR7	39.0778	-0.647387	0.687604	-0.941511	0.346443	0.760165	false
INHBA	1943.35	0.676457	0.726688	0.930877	0.351917	0.760165	false
UBE2T	471.404	0.34602	0.379157	0.912605	0.36145	0.760165	false
AMH	13.173	0.283459	0.310463	0.913017	0.361233	0.760165	false
ERCC6	417.849	0.338641	0.357715	0.946678	0.343803	0.760165	false
TP53	1016.38	-0.542001	0.594202	-0.91215	0.36169	0.760165	false
FGF1	97.3449	-0.590163	0.636364	-0.927399	0.353719	0.760165	false
MLH1	348.725	0.184891	0.201535	0.917415	0.358925	0.760165	false
MAPK12	60.0519	-0.417241	0.452512	-0.922056	0.3565	0.760165	false
MLF1	634.881	0.588985	0.629126	0.936196	0.349172	0.760165	false
PPP2CB	2099.52	0.388043	0.407015	0.953388	0.340394	0.760165	false
FANCL	335.624	-0.266945	0.293072	-0.910853	0.362373	0.760165	false
IRAK3	71.5856	-0.465648	0.496355	-0.938136	0.348175	0.760165	false
DDIT3	750.917	-0.440843	0.484248	-0.910366	0.36263	0.760165	false
TIAM1	652.939	0.334377	0.364592	0.917127	0.359076	0.760165	false
RAC1	2647.97	-0.301079	0.325569	-0.924778	0.355081	0.760165	false
FGF13	75.4499	-0.667646	0.717541	-0.930464	0.352131	0.760165	false
SUV39H2	275.576	-0.279021	0.295731	-0.943496	0.345427	0.760165	false
MDM2	1948.09	-0.463195	0.500987	-0.924564	0.355193	0.760165	false
NFKBIA	6271.49	-0.351668	0.379664	-0.926261	0.35431	0.760165	false
PCK1	21.8424	0.347951	0.367802	0.946028	0.344134	0.760165	false
CCND1	1413.34	0.664168	0.717596	0.925545	0.354682	0.760165	false
CALML6	14.4875	-0.367296	0.389321	-0.943427	0.345462	0.760165	false
PIM1	1988.15	0.4333	0.467869	0.926114	0.354387	0.760165	false
LEFTY1	41.0335	0.219966	0.243058	0.904994	0.365468	0.76204	false
IL1R2	393.757	-0.796761	0.878869	-0.906575	0.364631	0.76204	false
BMP6	83.0735	-0.643539	0.718155	-0.896101	0.370199	0.763545	false
FIGF	13.9061	-0.303599	0.338153	-0.897815	0.369284	0.763545	false
PLCB4	126.103	-0.78252	0.872854	-0.896507	0.369982	0.763545	false
PIK3CD	303.874	0.475327	0.527219	0.901574	0.367283	0.763545	false
HOXA11	26.8759	-0.516519	0.579141	-0.89187	0.372462	0.763545	false
SHC4	32.0174	-0.484566	0.543563	-0.891464	0.37268	0.763545	false
PLCG2	219.567	0.43173	0.484625	0.890854	0.373007	0.763545	false
WHSC1L1	942.766	-0.291145	0.332255	-0.876272	0.380882	0.775097	false
MAPK1	1842.21	-0.215633	0.245836	-0.877138	0.380412	0.775097	false
GRB2	2568.71	-0.220142	0.251613	-0.874921	0.381617	0.775097	false
ID4	191.844	-0.47832	0.551631	-0.867102	0.385886	0.779729	false
SF3A3	466.913	0.207949	0.239769	0.867288	0.385784	0.779729	false
PIK3R4	462.461	-0.2844	0.330439	-0.860674	0.389418	0.784842	false
PPP3R2	13.2857	0.259758	0.303542	0.855756	0.392133	0.788288	false
CACNB4	27.6426	-0.37398	0.44242	-0.845305	0.397941	0.791699	false
PTPRR	41.4565	0.948771	1.12464	0.843625	0.398879	0.791699	false
LAMA1	119.164	-0.450472	0.530634	-0.848931	0.395919	0.791699	false
PAK7	13.1704	-0.447732	0.529336	-0.845836	0.397644	0.791699	false
ACAD9	788.911	-0.34082	0.40307	-0.84556	0.397798	0.791699	false
DNMT1	925.505	0.278616	0.332155	0.838813	0.401574	0.793033	false
RIN1	368.829	-0.505575	0.602717	-0.838827	0.401566	0.793033	false
BCL2L1	1101.84	-0.249233	0.29788	-0.836687	0.402768	0.793393	false
AR	72.1515	-0.464143	0.562489	-0.825159	0.409281	0.79545	false
AKT1	2961.24	-0.214163	0.258992	-0.82691	0.408288	0.79545	false
FGF2	128.625	-0.612932	0.739688	-0.828637	0.40731	0.79545	false
CCND3	313.541	-0.248383	0.30141	-0.824069	0.4099	0.79545	false
MSH2	517.935	0.277171	0.333848	0.830229	0.406409	0.79545	false
MTMR14	287.421	-0.191262	0.22988	-0.832009	0.405404	0.79545	false
NGF	82.1043	0.703107	0.881457	0.797665	0.425065	0.801557	false
BCL2	80.5122	-0.437223	0.548599	-0.796981	0.425462	0.801557	false
FANCA	149.835	0.397285	0.489118	0.812249	0.416649	0.801557	false
TBL1XR1	5794.55	-0.250188	0.31562	-0.792687	0.42796	0.801557	false
CTNNB1	6058.51	-0.28213	0.350267	-0.805472	0.420548	0.801557	false
CSF1R	30.5323	-0.275034	0.348053	-0.790209	0.429406	0.801557	false
EPOR	69.4521	0.248432	0.309268	0.803289	0.421808	0.801557	false
EFNA3	518.839	-0.332012	0.418962	-0.792463	0.428091	0.801557	false
CALML5	120.382	-0.763399	0.965522	-0.79066	0.429143	0.801557	false
C19orf40	156.551	0.316976	0.392852	0.80686	0.419747	0.801557	false
WNT10A	305.453	-0.598084	0.749172	-0.798327	0.424681	0.801557	false
H3F3C	12695.7	-0.256854	0.32028	-0.801966	0.422572	0.801557	false
WHSC1	798.58	0.248015	0.31106	0.797322	0.425264	0.801557	false
PLA2G4E	497.93	-0.757385	0.936392	-0.808833	0.418611	0.801557	false
FANCB	149.603	0.326375	0.402193	0.811489	0.417085	0.801557	false
MDC1	394.611	0.211022	0.264048	0.79918	0.424186	0.801557	false
WEE1	1528.66	0.389202	0.493712	0.788317	0.430511	0.801712	false
ITGA2	1240.35	-0.395169	0.505029	-0.782468	0.433939	0.802378	false
PIK3R5	137.793	-0.387729	0.493527	-0.785629	0.432085	0.802378	false
SOCS2	197.034	0.33247	0.423982	0.78416	0.432946	0.802378	false
CRLF2	20.6244	-0.36027	0.462521	-0.778926	0.436023	0.80413	false
NTF3	41.0033	-0.585279	0.752892	-0.777375	0.436938	0.80413	false
NOS3	57.2993	-0.300618	0.387926	-0.774938	0.438376	0.804888	false
HDAC2	2226.38	-0.331151	0.444091	-0.745683	0.455859	0.806213	false
ETV7	113.509	0.462648	0.629924	0.734451	0.462674	0.806213	false
HSPA1A	792.807	-0.361263	0.479718	-0.753073	0.451406	0.806213	false
TNN	29.9458	-0.267444	0.360135	-0.742622	0.457711	0.806213	false
SHC2	37.7711	-0.357778	0.479117	-0.746745	0.455217	0.806213	false
FLNC	92.434	0.34128	0.450475	0.757602	0.44869	0.806213	false
GNG7	22.5605	-0.332626	0.453204	-0.733942	0.462984	0.806213	false
PDGFRA	205.647	-0.440742	0.585569	-0.752673	0.451647	0.806213	false
NGFR	400.215	-0.550567	0.743334	-0.740673	0.458892	0.806213	false
CHUK	596.784	0.183667	0.241005	0.762088	0.446007	0.806213	false
SFRP2	2446.97	-0.617524	0.825645	-0.747929	0.454503	0.806213	false
PRDM1	1298.16	-0.288592	0.394434	-0.731663	0.464374	0.806213	false
SETD2	504.508	-0.165815	0.228822	-0.724644	0.46867	0.806213	false
SKP2	966.775	0.296454	0.402991	0.735634	0.461953	0.806213	false
GRIN2A	40.7011	-0.293581	0.397867	-0.737889	0.460582	0.806213	false
CNTFR	61.135	-0.601738	0.830857	-0.724238	0.46892	0.806213	false
RASGRP2	58.4692	-0.403706	0.542834	-0.743702	0.457057	0.806213	false
CBL	292.632	-0.255908	0.337222	-0.758872	0.447929	0.806213	false
TGFBR2	757.193	-0.301351	0.410337	-0.734399	0.462706	0.806213	false
CDC25B	936.178	0.38569	0.514956	0.748976	0.453872	0.806213	false
DUSP2	58.4166	-0.495466	0.674226	-0.734866	0.462421	0.806213	false
FGF19	17.409	0.347866	0.450791	0.77168	0.440304	0.806213	false
E2F5	168.631	-0.378274	0.520037	-0.727397	0.466983	0.806213	false
FGF3	15.2418	0.228892	0.310181	0.737932	0.460556	0.806213	false
IL22RA1	230.255	0.428004	0.559706	0.764695	0.444453	0.806213	false
FAS	232.229	-0.347561	0.47733	-0.728135	0.466531	0.806213	false
ZKSCAN5	73.53	-0.205847	0.281496	-0.73126	0.464621	0.806213	false
ZNF346	71.9892	0.236868	0.326486	0.725508	0.468141	0.806213	false
NUBP1	153.883	0.201797	0.278169	0.725447	0.468178	0.806213	false
HDAC4	200.334	-0.302535	0.419554	-0.721087	0.470856	0.807771	false
FLNA	4677.81	0.266461	0.371551	0.71716	0.473275	0.808383	false
IL20RB	1795.02	-0.417965	0.581876	-0.718306	0.472569	0.808383	false
CHEK2	203.003	-0.192376	0.269095	-0.714898	0.474672	0.809006	false
PLA2G10	19.2788	-0.416996	0.590244	-0.70648	0.479889	0.816124	false
MAP3K8	232.437	-0.321632	0.458351	-0.701715	0.482857	0.819394	false
CACNA1D	20.6498	-0.255311	0.368136	-0.693523	0.487981	0.82452	false
CACNG4	88.674	0.592914	0.854124	0.694178	0.487571	0.82452	false
GNG4	111.334	-0.582041	0.841867	-0.691369	0.489334	0.825027	false
CASP3	506.484	-0.248768	0.367203	-0.677468	0.498109	0.829847	false
MAP3K1	570.596	-0.227583	0.333928	-0.681533	0.495534	0.829847	false
FST	991.179	0.544377	0.794661	0.685043	0.493317	0.829847	false
COL4A5	1246.43	-0.449161	0.666285	-0.674127	0.500231	0.829847	false
FANCG	177.07	-0.259224	0.38359	-0.675784	0.499178	0.829847	false
NFKB1	459.329	0.190644	0.279118	0.683023	0.494592	0.829847	false
TSC1	410.794	0.24338	0.361392	0.673452	0.50066	0.829847	false
FTSJ2	445.305	-0.151703	0.223674	-0.678232	0.497625	0.829847	false
FZD2	42.5526	-0.199151	0.299493	-0.664962	0.506075	0.833039	false
RAD52	182.861	-0.287566	0.431778	-0.666005	0.505408	0.833039	false
TLX1	11.594	0.209907	0.316234	0.663772	0.506836	0.833039	false
KIT	56.5239	-0.288287	0.434076	-0.664139	0.506601	0.833039	false
FUT8	227.382	-0.28419	0.429218	-0.66211	0.507901	0.833042	false
ALKBH3	267.962	-0.17797	0.269489	-0.660397	0.508999	0.833101	false
CASP9	119.476	-0.30098	0.459546	-0.65495	0.5125	0.837083	false
SIRT4	35.5345	0.22246	0.341959	0.650547	0.515339	0.839971	false
NFE2L2	3090.06	-0.348883	0.541317	-0.644507	0.519247	0.844584	false
HRAS	345.931	-0.224566	0.351606	-0.638688	0.523026	0.847428	false
NOG	15.5852	-0.389424	0.609918	-0.638486	0.523157	0.847428	false
PLA2G5	9.41187	0.222867	0.350918	0.635098	0.525364	0.847501	false
CD40	190.405	-0.320663	0.50456	-0.63553	0.525083	0.847501	false
PAX5	37.1781	0.369449	0.584511	0.632065	0.527344	0.848948	false
POS	10327	-0.151151	0.240801	-0.627703	0.530199	0.851795	false
PRKCG	11.832	0.25885	0.41597	0.62228	0.533758	0.854202	false
KDM5C	1075.43	-0.206161	0.331395	-0.6221	0.533876	0.854202	false
ITGA8	41.1426	0.240139	0.387798	0.619236	0.535761	0.855471	false
ABL1	459.45	0.156656	0.255035	0.614255	0.539047	0.857227	false
FGF7	92.3619	0.494475	0.804972	0.614276	0.539033	0.857227	false
IRAK2	219.012	-0.308632	0.504679	-0.611542	0.540841	0.858338	false
CEBPA	434.144	-0.316719	0.521993	-0.606749	0.544018	0.861636	false
EYA1	34.5138	-0.383286	0.636955	-0.601748	0.547342	0.865153	false
ZNF143	370.12	0.100048	0.167137	0.598601	0.549439	0.86672	false
ETV1	116.856	-0.323348	0.575366	-0.561987	0.574125	0.870661	false
PRL	14.9232	0.177742	0.322823	0.550587	0.581917	0.870661	false
SSX1	13.7459	-0.198502	0.363435	-0.546184	0.58494	0.870661	false
COL2A1	78.3267	0.209274	0.364065	0.574827	0.565408	0.870661	false
EZH2	457.827	0.241891	0.439036	0.550959	0.581662	0.870661	false
NOTCH1	1032.03	0.243721	0.420539	0.579545	0.562222	0.870661	false
RBX1	3172.88	-0.143404	0.248975	-0.575978	0.56463	0.870661	false
ANGPT1	70.0919	0.313061	0.557873	0.561169	0.574682	0.870661	false
FEN1	586.72	0.192698	0.345617	0.557546	0.577154	0.870661	false
WNT7A	75.0534	-0.346326	0.630665	-0.549145	0.582906	0.870661	false
PDGFA	118.486	0.169161	0.301554	0.560964	0.574822	0.870661	false
NR4A1	182.611	0.350147	0.635897	0.550635	0.581884	0.870661	false
MSH6	646.882	0.174443	0.319651	0.545728	0.585253	0.870661	false
PRKACG	31.2147	0.174239	0.296389	0.587873	0.556618	0.870661	false
HGF	82.6529	-0.216256	0.37782	-0.572378	0.567066	0.870661	false
CAMK2B	34.0094	0.189366	0.345542	0.548025	0.583675	0.870661	false
PIK3R3	390.122	-0.255127	0.456314	-0.559105	0.57609	0.870661	false
FGF20	34.8805	-0.179313	0.312803	-0.573246	0.566478	0.870661	false
PTPN11	1400.09	-0.123585	0.210395	-0.587393	0.55694	0.870661	false
CDK6	1477.81	0.461359	0.832261	0.554344	0.579343	0.870661	false
MAPK3	819.628	-0.205601	0.374416	-0.549126	0.582919	0.870661	false
RPA3	17.7216	0.164827	0.300011	0.549403	0.582729	0.870661	false
ITGB3	71.1552	-0.241924	0.42989	-0.562759	0.573599	0.870661	false
LTBP1	1647.39	-0.296282	0.532588	-0.556306	0.578002	0.870661	false
GHR	77.1867	-0.352392	0.632939	-0.556755	0.577695	0.870661	false
EIF2B4	662.618	-0.169803	0.310162	-0.547466	0.584059	0.870661	false
NEG	17.4735	0.187619	0.321271	0.58399	0.559227	0.870661	false
NEG	23.9419	-0.177717	0.316963	-0.560687	0.575011	0.870661	false
POS	2509.62	-0.130297	0.236638	-0.550618	0.581896	0.870661	false
POS	22110.5	-0.146499	0.251922	-0.581526	0.560886	0.870661	false
NFKBIZ	1874.53	-0.319138	0.594179	-0.537108	0.591193	0.872535	false
COL24A1	43.0607	-0.255138	0.477547	-0.534269	0.593156	0.872535	false
CACNB2	20.1778	0.267243	0.501429	0.532962	0.59406	0.872535	false
IL1B	271.147	-0.402258	0.74683	-0.538621	0.590148	0.872535	false
PTPN5	11.3818	-0.179716	0.337425	-0.532611	0.594303	0.872535	false
TPO	14.4755	0.28047	0.521704	0.537604	0.590851	0.872535	false
PLA1A	20.2097	-0.268912	0.501553	-0.536158	0.591849	0.872535	false
IL7	26.3297	-0.273156	0.518053	-0.527274	0.598004	0.876327	false
RASAL1	137.007	-0.416487	0.793019	-0.525192	0.599449	0.876807	false
PLA2G4A	158.079	0.443806	0.863717	0.513832	0.607369	0.883718	false
CACNB3	101.187	-0.201563	0.394955	-0.510344	0.60981	0.883718	false
NODAL	32.4139	0.223228	0.436939	0.51089	0.609428	0.883718	false
SPRY1	149.416	-0.219831	0.425838	-0.516231	0.605693	0.883718	false
PRPF38A	642.916	0.118461	0.231817	0.511011	0.609343	0.883718	false
BIRC3	78.2854	-0.335258	0.671948	-0.498934	0.617826	0.893681	false
PAK3	14.255	0.159946	0.322278	0.496299	0.619684	0.894718	false
IL6R	115.118	-0.205992	0.420665	-0.489682	0.624359	0.894876	false
TSHR	51.9998	-0.212005	0.42917	-0.493989	0.621314	0.894876	false
COMP	497.851	-0.543464	1.10877	-0.490152	0.624026	0.894876	false
FUBP1	1860.4	0.131868	0.268103	0.491856	0.622821	0.894876	false
EFNA5	78.6129	-0.282247	0.586057	-0.481602	0.630088	0.899988	false
MAP2K4	400.829	-0.168238	0.349466	-0.481416	0.630221	0.899988	false
GADD45G	81.7181	-0.191017	0.399595	-0.478026	0.632632	0.901788	false
TMUB2	237.222	-0.117707	0.247737	-0.475131	0.634694	0.903085	false
CREB3L3	6.91206	0.181323	0.383918	0.472295	0.636716	0.904067	false
GPATCH3	62.8987	-0.141394	0.300244	-0.470931	0.63769	0.904067	false
DUSP5	1046.07	-0.218235	0.469578	-0.464748	0.642112	0.908693	false
SMARCA4	1102.16	0.122087	0.268674	0.454406	0.649536	0.914249	false
ID2	266.242	0.250917	0.548313	0.457617	0.647227	0.914249	false
NFATC1	87.8877	0.186467	0.409481	0.455373	0.648841	0.914249	false
PIK3CG	92.0725	-0.279806	0.626126	-0.446884	0.654959	0.917332	false
NR4A3	150.523	0.313867	0.699627	0.44862	0.653706	0.917332	false
COL27A1	529.65	-0.260989	0.584524	-0.446498	0.655237	0.917332	false
SFRP1	628.117	0.464594	1.0448	0.444673	0.656556	0.91754	false
DKK4	36.3452	-0.206337	0.46887	-0.440073	0.659884	0.920505	false
VPS33B	115.26	-0.131389	0.299635	-0.438497	0.661026	0.920505	false
COL4A4	32.3033	0.213277	0.489276	0.435903	0.662907	0.921488	false
BMP7	454.286	0.321811	0.745805	0.431495	0.666108	0.922666	false
EIF4EBP1	1523.42	-0.234601	0.542996	-0.43205	0.665705	0.922666	false
IL23A	43.4367	-0.187415	0.436494	-0.429364	0.667658	0.923182	false
HHEX	158.156	-0.240973	0.564492	-0.426885	0.669463	0.924047	false
CREB3L1	305.161	-0.270704	0.637253	-0.424798	0.670984	0.924519	false
COL11A1	1608.02	-0.473566	1.11964	-0.422964	0.672322	0.924737	false
HIST1H3B	9061.97	0.189473	0.452836	0.418415	0.675644	0.926625	false
IL7R	482.801	0.273372	0.654238	0.417848	0.676058	0.926625	false
UBB	9644.89	-0.118809	0.286354	-0.414903	0.678213	0.92689	false
FGF8	13.5289	0.170438	0.411335	0.414353	0.678616	0.92689	false
PRKACA	1776.39	-0.113636	0.288668	-0.393657	0.693834	0.928009	false
RASA4	212.863	-0.182131	0.464488	-0.392112	0.694975	0.928009	false
IKBKG	472.471	0.12562	0.324553	0.387054	0.698716	0.928009	false
CDK4	705.126	0.120433	0.314216	0.38328	0.701512	0.928009	false
TFDP1	1094.83	0.140521	0.376659	0.373072	0.709095	0.928009	false
SOCS1	278.439	0.190615	0.504622	0.377738	0.705625	0.928009	false
DUSP10	569.451	-0.241188	0.58777	-0.410344	0.681553	0.928009	false
IBSP	21.4991	0.163176	0.423912	0.384928	0.70029	0.928009	false
PLA2G3	106.271	-0.345448	0.917232	-0.376621	0.706456	0.928009	false
MCM2	630.6	0.16012	0.396821	0.403507	0.686575	0.928009	false
SHC3	27.4846	-0.175942	0.433127	-0.406214	0.684586	0.928009	false
GATA1	31.0862	0.124247	0.324042	0.38343	0.701401	0.928009	false
FOXL2	39.2777	-0.148525	0.379812	-0.391047	0.695762	0.928009	false
FANCF	130.421	-0.168229	0.442949	-0.379794	0.704099	0.928009	false
TNR	24.4671	0.140409	0.358839	0.391288	0.695585	0.928009	false
CLCF1	62.9567	0.201355	0.540596	0.372469	0.709544	0.928009	false
PDGFRB	1510.83	-0.183363	0.488485	-0.375371	0.707385	0.928009	false
ITGA9	48.309	0.119754	0.315011	0.380158	0.703828	0.928009	false
MLLT4	1002.87	-0.114539	0.287071	-0.398992	0.689899	0.928009	false
STAG2	1466.75	-0.120708	0.317079	-0.380685	0.703437	0.928009	false
ID1	5183.09	0.180561	0.473699	0.381172	0.703076	0.928009	false
C10orf76	234.786	-0.136779	0.35251	-0.388015	0.698005	0.928009	false
RBM45	192.404	0.0798231	0.199551	0.400013	0.689147	0.928009	false
CC2D1B	26.7565	0.139688	0.363364	0.384429	0.700661	0.928009	false
NEG	17.6183	0.124118	0.322977	0.384295	0.70076	0.928009	false
POS	587.827	-0.0888954	0.239241	-0.371573	0.710211	0.928009	false
PLA2G4C	63.9789	-0.17189	0.469832	-0.365855	0.714474	0.930483	false
LAMB3	5800.28	0.220973	0.604001	0.365849	0.714478	0.930483	false
LEFTY2	11.2592	0.238551	0.666317	0.358015	0.720332	0.930945	false
FGF10	61.2758	-0.335936	0.930254	-0.361122	0.718008	0.930945	false
VEGFA	4503.56	-0.199597	0.558423	-0.35743	0.72077	0.930945	false
GADD45B	677.805	0.179249	0.495651	0.361643	0.717619	0.930945	false
FZD8	58.8371	0.126109	0.350919	0.359369	0.719319	0.930945	false
DHX16	111.884	-0.0709985	0.200876	-0.353444	0.723756	0.933264	false
SFRP4	262.303	-0.393111	1.13723	-0.345673	0.729588	0.936165	false
SIN3A	494.787	-0.104989	0.302973	-0.346529	0.728945	0.936165	false
IL13RA2	25.3556	-0.273651	0.785765	-0.348261	0.727644	0.936165	false
SMC1A	978.33	-0.117868	0.347115	-0.339564	0.734185	0.939245	false
NSD1	422.14	0.146902	0.432958	0.339299	0.734384	0.939245	false
WNT5B	89.7689	-0.244629	0.737427	-0.331733	0.740091	0.94123	false
CACNA2D2	36.3724	0.117339	0.353001	0.332403	0.739585	0.94123	false
DLL4	86.2088	-0.112323	0.339472	-0.330876	0.740738	0.94123	false
MRPS5	1153.35	-0.0863043	0.258919	-0.333326	0.738888	0.94123	false
GZMB	184.567	0.260484	0.796095	0.327202	0.743515	0.94323	false
BAMBI	96.3488	0.215315	0.731458	0.294364	0.768479	0.94577	false
IFNG	19.1791	0.109682	0.376572	0.291263	0.77085	0.94577	false
NRAS	322.14	0.0940745	0.312659	0.300885	0.763502	0.94577	false
SETBP1	801.703	-0.149777	0.50248	-0.298075	0.765646	0.94577	false
CCNE1	237.069	0.136419	0.460266	0.296391	0.766932	0.94577	false
MYC	2107.8	0.153419	0.479249	0.320124	0.748875	0.94577	false
RPS27A	60169.5	0.0833728	0.281771	0.295889	0.767315	0.94577	false
RAD50	271.229	-0.107839	0.356509	-0.302487	0.762281	0.94577	false
CCNO	14.6587	0.101086	0.337073	0.299894	0.764258	0.94577	false
COL5A1	6239.07	-0.190286	0.602461	-0.315847	0.752118	0.94577	false
GNAS	1911.51	-0.101862	0.355092	-0.286861	0.774219	0.94577	false
LRP2	14.4419	0.109385	0.340822	0.320946	0.748251	0.94577	false
STK11	313.503	-0.0834699	0.265575	-0.314299	0.753294	0.94577	false
ETS2	4066.37	-0.15545	0.506325	-0.307016	0.758831	0.94577	false
CUL1	1077.31	-0.0937355	0.327137	-0.286533	0.77447	0.94577	false
FGFR1	288.748	-0.149137	0.504064	-0.295869	0.76733	0.94577	false
GATA3	17.1891	-0.112586	0.369321	-0.304847	0.760483	0.94577	false
COL5A2	4014.09	-0.171806	0.548893	-0.313004	0.754278	0.94577	false
RASGRF2	19.95	-0.104959	0.341366	-0.307469	0.758486	0.94577	false
IL12A	21.8531	-0.140196	0.460386	-0.304519	0.760733	0.94577	false
LAMA5	556.148	-0.151433	0.527369	-0.287148	0.773999	0.94577	false
ZC3H14	606.402	-0.0515878	0.179017	-0.288173	0.773214	0.94577	false
DDX50	700.645	-0.0628106	0.215257	-0.291794	0.770444	0.94577	false
NEG	15.8184	0.0866039	0.293287	0.295287	0.767774	0.94577	false
HSP90B1	3274.16	-0.0662922	0.245261	-0.270293	0.786935	0.948612	false
LIG4	297.562	-0.103098	0.382813	-0.269316	0.787686	0.948612	false
WNT6	16.2612	-0.116084	0.427919	-0.271277	0.786178	0.948612	false
PPP3CC	220.678	0.0698582	0.252081	0.277126	0.781684	0.948612	false
IL23R	33.9961	0.12383	0.450593	0.274817	0.783457	0.948612	false
PPP2R2B	54.436	-0.139208	0.506575	-0.274802	0.783468	0.948612	false
IL3RA	52.1561	0.087232	0.320497	0.272177	0.785486	0.948612	false
ZNF384	646.022	0.0855559	0.315907	0.270827	0.786524	0.948612	false
NEG	15.5204	0.0875741	0.320557	0.273193	0.784705	0.948612	false
FOSL1	648.15	0.184988	0.701195	0.263818	0.791921	0.949336	false
ITGB4	6812.95	-0.122166	0.462974	-0.263872	0.791878	0.949336	false
COL11A2	20.2886	-0.0844376	0.317488	-0.265955	0.790274	0.949336	false
SGK2	20.1028	-0.0769258	0.293414	-0.262175	0.793186	0.949402	false
KAT2B	269.385	-0.0781931	0.355755	-0.219795	0.826031	0.951232	false
MAPT	22.3763	0.104893	0.440622	0.238057	0.811837	0.951232	false
IL10	33.4667	-0.102235	0.410558	-0.249014	0.80335	0.951232	false
IL3	27.2925	0.0640272	0.265375	0.241271	0.809345	0.951232	false
NASP	146.579	-0.108067	0.425469	-0.253995	0.799499	0.951232	false
DLL1	334.106	0.119174	0.529395	0.225114	0.821891	0.951232	false
THBS4	66.6067	-0.20229	0.885287	-0.228502	0.819256	0.951232	false
PPP3R1	2708.48	-0.0507242	0.223178	-0.227281	0.820205	0.951232	false
FOS	7233.35	0.188561	0.859052	0.219498	0.826262	0.951232	false
RXRG	26.6932	-0.162719	0.723955	-0.224764	0.822163	0.951232	false
FN1	6333.4	0.18404	0.730135	0.252063	0.800992	0.951232	false
FGF17	8.9861	0.0810731	0.344586	0.235277	0.813994	0.951232	false
CCNA1	334.91	0.205972	0.916432	0.224754	0.822171	0.951232	false
CDKN1B	183.243	-0.0828466	0.338699	-0.244602	0.806764	0.951232	false
B2M	90657.2	0.11142	0.50285	0.221578	0.824642	0.951232	false
PPP2R1A	2097.21	0.0528592	0.211962	0.24938	0.803067	0.951232	false
TNFRSF10D	168.062	-0.133097	0.543533	-0.244873	0.806554	0.951232	false
MPO	30.6514	0.0793565	0.326264	0.243228	0.807829	0.951232	false
NPM1	77.83	0.0753065	0.315425	0.238746	0.811302	0.951232	false
HHIP	31.9153	-0.0980453	0.391537	-0.250411	0.80227	0.951232	false
FGF9	23.1913	-0.0925302	0.4137	-0.223665	0.823018	0.951232	false
FGF18	20.4425	-0.080394	0.316649	-0.25389	0.79958	0.951232	false
CEBPE	31.4792	-0.125594	0.558554	-0.224855	0.822092	0.951232	false
PTCRA	14.0878	-0.0863234	0.369923	-0.233355	0.815486	0.951232	false
PHF6	624.078	-0.0715606	0.316805	-0.225882	0.821293	0.951232	false
CNOT10	302.193	-0.0481287	0.201285	-0.239107	0.811022	0.951232	false
PROM1	32.8656	-0.0633553	0.290751	-0.217902	0.827505	0.951267	false
KITLG	847.536	-0.109569	0.510346	-0.214696	0.830004	0.951696	false
GDF6	24.7887	-0.111864	0.521973	-0.214309	0.830306	0.951696	false
GRIN1	11.88	0.0758616	0.367458	0.206449	0.83644	0.956456	false
FGF6	12.2762	-0.0706601	0.34324	-0.205862	0.836899	0.956456	false
TNC	473.209	0.12347	0.618993	0.199469	0.841896	0.956589	false
WNT4	355.101	0.193186	0.951963	0.202934	0.839187	0.956589	false
DKK2	47.4821	-0.0684382	0.339093	-0.201827	0.840052	0.956589	false
IL1RAP	853.873	0.0708842	0.354159	0.200148	0.841365	0.956589	false
CASP10	32.6808	-0.0586144	0.296355	-0.197785	0.843214	0.9567	false
IL1A	344.251	-0.167854	0.916946	-0.183058	0.854753	0.960066	false
TGFB2	219.06	-0.133701	0.720709	-0.185513	0.852826	0.960066	false
CACNG6	16.3076	-0.0566769	0.308205	-0.183894	0.854097	0.960066	false
WNT10B	24.6717	-0.0943166	0.513153	-0.183798	0.854172	0.960066	false
PGF	313.644	-0.0784501	0.409868	-0.191403	0.84821	0.960066	false
EPHA2	789.612	0.102352	0.546633	0.18724	0.851472	0.960066	false
NEG	36.5719	-0.0571911	0.300214	-0.190501	0.848917	0.960066	false
COL4A6	338.103	-0.16092	0.888229	-0.18117	0.856234	0.960305	false
SYK	935.248	0.0961128	0.540844	0.177709	0.858952	0.960305	false
NF2	801.142	-0.0558382	0.314285	-0.177668	0.858984	0.960305	false
NKD1	93.6361	-0.0795891	0.450812	-0.176546	0.859865	0.960305	false
CREB5	384.455	0.0917485	0.534204	0.171748	0.863636	0.961884	false
DDB2	736.863	-0.0596489	0.350742	-0.170065	0.864959	0.961884	false
AMMECR1L	530.626	0.0424997	0.249663	0.170229	0.86483	0.961884	false
PPP3CA	487.809	-0.0553617	0.332749	-0.166377	0.86786	0.963743	false
IFNA2	11.2055	-0.0537045	0.330365	-0.162561	0.870864	0.963858	false
GNAQ	848.344	-0.0498898	0.311459	-0.160181	0.872739	0.963858	false
LAMB4	42.4	0.077967	0.485082	0.16073	0.872306	0.963858	false
FGF22	31.4259	-0.0589392	0.372	-0.158439	0.874111	0.963858	false
PRKAR1B	114.154	0.0736958	0.461823	0.159576	0.873215	0.963858	false
OSM	86.6731	-0.0900665	0.582233	-0.154691	0.877065	0.964091	false
PPP2R2C	937.877	-0.093885	0.605487	-0.155057	0.876776	0.964091	false
IL5RA	15.2567	0.0469556	0.308226	0.152341	0.878918	0.964091	false
FASLG	37.2684	0.0527061	0.346907	0.151932	0.879241	0.964091	false
JAK1	1320.19	-0.0472669	0.31919	-0.148084	0.882276	0.964528	false
TGFB1	2767.93	-0.0489167	0.333337	-0.146749	0.88333	0.964528	false
COL3A1	32807.4	-0.108932	0.731791	-0.148857	0.881667	0.964528	false
ETV4	162.264	-0.115061	0.813563	-0.141429	0.887531	0.964626	false
GNGT1	23.9278	-0.0579217	0.421898	-0.137288	0.890803	0.964626	false
SOCS3	1385.77	0.0858846	0.619725	0.138585	0.889778	0.964626	false
CACNG1	29.4497	0.0418894	0.295302	0.141853	0.887196	0.964626	false
TNFAIP3	2225.43	0.0721589	0.520914	0.138524	0.889827	0.964626	false
TNFRSF10B	266.054	-0.0630368	0.449899	-0.140113	0.88857	0.964626	false
TSLP	83.9034	0.105442	0.792397	0.133067	0.894141	0.965608	false
DKK1	226.843	-0.110326	0.829355	-0.133027	0.894172	0.965608	false
USP39	291.008	0.0329204	0.250456	0.131442	0.895426	0.965631	false
PML	1509.65	-0.0496595	0.384326	-0.129212	0.89719	0.965813	false
POS	98.3981	-0.031581	0.246506	-0.128114	0.898059	0.965813	false
MAP2K1	711.555	-0.0511815	0.410523	-0.124674	0.900782	0.967415	false
STAT1	1272.45	0.0832915	0.690155	0.120685	0.90394	0.968387	false
GATA2	66.5452	0.0395276	0.32827	0.120412	0.904157	0.968387	false
HMGA2	68.3212	-0.0714866	0.602882	-0.118575	0.905612	0.968622	false
GNG12	4452.96	0.0388884	0.341822	0.113768	0.909422	0.970272	false
FBXW7	305.037	-0.0398518	0.353499	-0.112735	0.910241	0.970272	false
MAPK8	413.124	0.0429504	0.383676	0.111945	0.910867	0.970272	false
ITGA7	46.7404	-0.0444245	0.431046	-0.103062	0.917914	0.976451	false
BCL2A1	140.871	0.0673166	0.700469	0.0961023	0.923439	0.978869	false
RAC3	275.633	-0.0659662	0.690877	-0.0954818	0.923932	0.978869	false
UTY	10.0732	-0.0337857	0.34713	-0.0973286	0.922465	0.978869	false
DDIT4	1016.64	-0.0514599	0.550243	-0.093522	0.925489	0.979195	false
AKT2	1563.8	0.0248826	0.287539	0.0865366	0.93104	0.981625	false
MAPK9	518.172	-0.0344582	0.401122	-0.0859043	0.931542	0.981625	false
NUMBL	210.582	0.0379505	0.441115	0.0860332	0.93144	0.981625	false
WNT11	76.3913	-0.0660712	0.785184	-0.0841474	0.932939	0.981778	false
ITGB7	63.6758	0.0321738	0.440782	0.0729926	0.941812	0.982432	false
IGF1	64.7615	-0.040326	0.527044	-0.0765135	0.939011	0.982432	false
DAXX	921.803	-0.0158201	0.218697	-0.0723381	0.942333	0.982432	false
CDH1	4618.16	0.0349081	0.437371	0.0798134	0.936386	0.982432	false
AXIN1	519.256	0.0242367	0.319724	0.075805	0.939574	0.982432	false
MMP3	746.962	-0.0623237	0.791155	-0.0787756	0.937211	0.982432	false
CASP7	513.15	0.0257492	0.346077	0.074403	0.94069	0.982432	false
SRSF2	1584.94	-0.0136022	0.203197	-0.066941	0.946629	0.984293	false
FGF4	36.4614	-0.0221198	0.327099	-0.0676243	0.946085	0.984293	false
RB1	1398.7	0.021363	0.398384	0.0536243	0.957235	0.987604	false
SOX17	16.5972	-0.0178285	0.355101	-0.0502069	0.959958	0.987604	false
ALK	22.4263	0.0146744	0.287765	0.0509946	0.95933	0.987604	false
PITX2	25.4574	-0.0233498	0.432113	-0.0540364	0.956906	0.987604	false
EFNA2	29.6046	-0.0191085	0.348315	-0.05486	0.95625	0.987604	false
FGF23	25.2492	-0.0167448	0.30638	-0.0546537	0.956414	0.987604	false
COL4A3	19.6848	0.0237645	0.487871	0.0487106	0.96115	0.987604	false
CD19	51.2093	0.0415673	0.828221	0.0501886	0.959972	0.987604	false
EDC3	948.195	0.0182172	0.331854	0.054895	0.956222	0.987604	false
TRAF7	1985.88	0.0126073	0.322953	0.0390377	0.96886	0.989045	false
DUSP6	1979.75	0.0260999	0.596393	0.0437629	0.965093	0.989045	false
MET	1194.7	0.0233939	0.532262	0.0439519	0.964943	0.989045	false
CREBBP	36.7909	0.0112578	0.270825	0.0415686	0.966843	0.989045	false
SLC4A1AP	588.459	-0.0104383	0.264253	-0.0395012	0.968491	0.989045	false
CAPN2	5849.21	0.0153902	0.418384	0.0367849	0.970656	0.98959	false
STAT4	134.08	0.0150152	0.472486	0.0317791	0.974648	0.992201	false
PDGFD	92.54	-0.0190793	0.627615	-0.0303997	0.975748	0.992201	false
HSPA2	2085.45	0.0208651	0.767503	0.0271857	0.978312	0.992233	false
GAS1	499.223	-0.0172258	0.62819	-0.0274214	0.978124	0.992233	false
CREB3L4	58.2666	-0.0078964	0.309601	-0.0255051	0.979652	0.992309	false
HPGD	15.2037	0.00511453	0.304948	0.0167718	0.986619	0.993939	false
RAF1	832.486	0.00272232	0.252653	0.0107749	0.991403	0.993939	false
CHAD	17.7042	-0.00365038	0.310405	-0.01176	0.990617	0.993939	false
FGF16	31.882	-0.00567402	0.364245	-0.0155775	0.987571	0.993939	false
RRAS2	640.596	-0.00408187	0.359882	-0.0113422	0.99095	0.993939	false
RHOA	886.337	0.00699881	0.380384	0.0183993	0.98532	0.993939	false
MAP2K2	1575.89	-0.00308749	0.21093	-0.0146375	0.988321	0.993939	false
CCNB3	14.5137	-0.00719543	0.345362	-0.0208344	0.983378	0.993939	false
ACVR1C	57.3143	0.00318648	0.435166	0.00732243	0.994158	0.995427	false
POLB	359.64	-0.00203904	0.379128	-0.00537823	0.995709	0.995709	false

## Sheet: OTHER vs HPV
geneSymbol	baseMean	log2FoldChange	lfcSE	stat	pvalue	padj	|log2FC|>=1 AND FDR <= 0.1
PBX1	391.851	-2.83292	0.754656	-3.75392	0.000174093	0.0139826	true
HSPA1A	792.807	-2.07853	0.560646	-3.70737	0.000209419	0.0139826	true
SP1	352.755	-1.06814	0.250702	-4.26058	2.03894e-05	0.0139826	true
DKK1	226.843	3.58418	0.976774	3.6694	0.000243121	0.0139826	true
MYB	47.5361	-2.01548	0.545499	-3.69474	0.000220116	0.0139826	true
IKBKB	383.087	-1.1321	0.287329	-3.94009	8.14501e-05	0.0139826	true
FANCL	335.624	-1.24123	0.340103	-3.64957	0.000262678	0.0139826	true
ARID2	542.605	-1.04273	0.280997	-3.71084	0.000206571	0.0139826	true
H3F3A	13808.2	-1.20847	0.326364	-3.70282	0.000213217	0.0139826	true
ARID1B	833.675	-0.953881	0.254488	-3.74824	0.000178082	0.0139826	false
BNIP3	2447.46	2.55864	0.635657	4.02518	5.69307e-05	0.0139826	true
CCND1	1413.34	3.34433	0.840203	3.98039	6.88022e-05	0.0139826	true
CACNA2D3	71.0843	-3.67927	1.00266	-3.66951	0.000243013	0.0139826	true
CDKN2C	439.597	-1.59953	0.447226	-3.57656	0.000348147	0.0172084	true
PTPRR	41.4565	4.75836	1.34622	3.53462	0.000408363	0.0176617	true
DNMT3A	380.484	-1.16065	0.326897	-3.55051	0.00038448	0.0176617	true
TNFSF10	10773.8	-2.41806	0.704271	-3.43343	0.000596001	0.0206728	true
MCM2	630.6	-1.60554	0.462784	-3.46931	0.000521789	0.0206728	true
FGF10	61.2758	-3.69711	1.07701	-3.43276	0.00059748	0.0206728	true
CACNA1H	99.9923	1.13249	0.328225	3.45034	0.00055989	0.0206728	true
PBRM1	635.329	-0.9683	0.285813	-3.38789	0.000704338	0.0232096	false
APC	225.255	-1.07233	0.318973	-3.36182	0.000774292	0.024355	true
MAML2	294.806	1.62504	0.486873	3.33771	0.000844722	0.0254151	true
TMPRSS2	143.233	-4.41321	1.37706	-3.20481	0.0013515	0.0379906	true
PIK3R1	646.9	-2.21433	0.695521	-3.1837	0.00145406	0.0379906	true
CCNA1	334.91	3.41408	1.07424	3.17813	0.00148229	0.0379906	true
PBX3	355.291	-1.32314	0.41461	-3.19128	0.00141644	0.0379906	true
BCOR	208.888	-0.857265	0.273987	-3.12885	0.0017549	0.0433712	false
PIK3CA	818.864	-1.16279	0.377584	-3.07955	0.00207316	0.0492651	true
MECOM	138.838	-1.71078	0.558918	-3.06087	0.00220696	0.0492651	true
MED12	437.073	-0.990851	0.323082	-3.06687	0.00216313	0.0492651	false
SPP1	4247.58	-2.63965	0.88201	-2.99277	0.00276462	0.0579732	true
SUV39H2	275.576	-1.02801	0.34307	-2.99651	0.00273085	0.0579732	true
PIK3R3	390.122	-1.57579	0.531884	-2.96265	0.00305002	0.0620769	true
PRMT8	39.2732	2.68504	0.929415	2.88896	0.00386515	0.0764196	true
MAP3K5	186.212	-1.23488	0.42882	-2.87972	0.00398028	0.0765099	true
IL15	58.2953	-2.16646	0.759181	-2.85368	0.00432154	0.0808245	true
PLAT	1779.97	-2.42393	0.853168	-2.84109	0.00449591	0.0818729	true
NGF	82.1043	2.88875	1.03553	2.78965	0.00527658	0.0869379	true
HSPB1	12625.4	-1.53739	0.549902	-2.79576	0.00517785	0.0869379	true
THBS1	2363.98	1.99249	0.710286	2.80519	0.00502869	0.0869379	true
GTF2H3	812.959	0.854377	0.304922	2.80195	0.00507941	0.0869379	false
FGF7	92.3619	2.63048	0.946393	2.77948	0.00544458	0.0876197	true
CDK6	1477.81	2.69703	0.97411	2.76872	0.00562778	0.0885096	true
BRCA2	335.652	-0.920298	0.340696	-2.70123	0.00690843	0.0994885	false
VEGFC	532.047	2.72533	1.0083	2.7029	0.00687382	0.0994885	true
MAP2K6	74.8463	-1.88315	0.696241	-2.70473	0.00683596	0.0994885	true
CACNA2D1	191.047	-2.28067	0.840568	-2.71324	0.00666284	0.0994885	true
IL7R	482.801	2.05649	0.765068	2.68798	0.00718847	0.0994885	true
POLR2H	829.507	-0.709859	0.263729	-2.69163	0.00711046	0.0994885	false
DTX3	86.6803	-1.27296	0.476885	-2.66932	0.00760044	0.103127	false
NTHL1	170.411	-0.886329	0.333875	-2.65468	0.00793847	0.105643	false
SMC1B	65.5756	-1.52343	0.578989	-2.63118	0.00850883	0.111096	false
NOTCH1	1032.03	-1.28034	0.491655	-2.60415	0.00921028	0.113813	false
SHC2	37.7711	-1.43344	0.549422	-2.609	0.00908067	0.113813	false
TBL1XR1	5794.55	-0.962447	0.368946	-2.60864	0.0090903	0.113813	false
MAP3K1	570.596	-1.00063	0.389083	-2.57177	0.010118	0.11773	false
CIC	565.293	-0.86764	0.337062	-2.57412	0.0100495	0.11773	false
THBS4	66.6067	-2.63304	1.02734	-2.56298	0.0103779	0.11773	false
ARID1A	606.244	-0.753269	0.29341	-2.56729	0.0102498	0.11773	false
SOS1	741.25	-0.600632	0.23309	-2.57683	0.00997113	0.11773	false
ITGA6	12145.5	1.76368	0.695433	2.53609	0.0112097	0.125115	false
LAMC2	11492.7	2.15565	0.853124	2.52677	0.0115117	0.126446	false
ZAK	440.505	1.01994	0.407416	2.50343	0.0122997	0.132991	false
ERCC2	223.366	0.76596	0.306838	2.4963	0.0125495	0.133604	false
LAMA1	119.164	1.54416	0.624464	2.47278	0.0134068	0.140568	false
HSPA6	435.669	-1.84181	0.767634	-2.39934	0.0164247	0.162772	false
JAK2	527.82	-0.927334	0.386642	-2.39843	0.0164654	0.162772	false
CREB3L4	58.2666	-0.845289	0.35172	-2.4033	0.0162477	0.162772	false
PIAS1	568.918	-0.644662	0.267179	-2.41285	0.0158283	0.162772	false
PLCG2	219.567	1.35418	0.567226	2.38737	0.0169694	0.165392	false
SHC3	27.4846	1.19734	0.506007	2.36625	0.0179692	0.172704	false
FGF14	37.1942	1.00307	0.427067	2.34873	0.0188374	0.176155	false
MAPK8IP2	59.2788	-1.62847	0.693229	-2.3491	0.0188187	0.176155	false
SOS2	432.281	-0.826388	0.353473	-2.33791	0.0193919	0.178923	false
SKP1	5447.55	-0.932048	0.401357	-2.32224	0.02022	0.184109	false
SMAD9	87.5561	-1.61638	0.698755	-2.31322	0.0207105	0.186125	false
PRKAA2	50.4714	-2.13242	0.925659	-2.30367	0.0212409	0.188445	false
ATR	659.62	-0.693452	0.304767	-2.27535	0.0228851	0.195512	false
CCNE2	393.299	-0.961974	0.422321	-2.27783	0.0227368	0.195512	false
SMAD4	773.671	-0.97739	0.429378	-2.27629	0.0228284	0.195512	false
FLNC	92.434	1.19748	0.528555	2.26557	0.023478	0.198131	false
ITGB8	2631.91	-1.13206	0.501635	-2.25674	0.0240244	0.2003	false
PRKX	278.974	-1.36841	0.611373	-2.23826	0.0252042	0.200475	false
ITGB6	2649.94	-1.74548	0.77682	-2.24696	0.0246427	0.200475	false
BRIP1	344.54	-0.987638	0.441122	-2.23892	0.0251609	0.200475	false
CASP9	119.476	-1.19638	0.532288	-2.24762	0.0246007	0.200475	false
TET2	1024.22	-0.830926	0.37534	-2.2138	0.0268428	0.207068	false
TP53	1016.38	-1.5299	0.692827	-2.2082	0.0272301	0.207068	false
RFC3	674.151	-0.850957	0.383987	-2.21611	0.0266841	0.207068	false
WNT11	76.3913	2.03828	0.921993	2.21073	0.0270544	0.207068	false
PIK3R4	462.461	-0.846457	0.384503	-2.20143	0.0277054	0.208393	false
BMP6	83.0735	1.83143	0.847403	2.16122	0.030678	0.228271	false
PLD1	1009.67	-1.24766	0.579009	-2.15481	0.0311763	0.229511	false
ACVR1B	185.038	-0.73178	0.341128	-2.14518	0.0319386	0.232647	false
PIK3CD	303.874	1.30242	0.617398	2.10953	0.0348992	0.239111	false
CASP8	732.496	-0.789097	0.373929	-2.11029	0.0348338	0.239111	false
KMT2D	634.472	-0.480006	0.226495	-2.11928	0.0340666	0.239111	false
EP300	1159.83	-0.595883	0.281384	-2.11768	0.0342018	0.239111	false
H3F3C	12695.7	-0.791145	0.374431	-2.11293	0.0346069	0.239111	false
ACVR2A	275.449	-0.860763	0.404551	-2.1277	0.0333621	0.239111	false
CALML3	466.606	-1.36443	0.652526	-2.09099	0.036529	0.240219	false
RET	70.9676	1.46157	0.699707	2.08884	0.0367224	0.240219	false
HIST1H3B	9061.97	-1.11365	0.529683	-2.10248	0.0355114	0.240219	false
IL24	166.161	2.12534	1.01788	2.08801	0.0367965	0.240219	false
NF1	1094.32	-0.781391	0.372625	-2.09699	0.0359943	0.240219	false
GSK3B	542.306	-0.758591	0.364503	-2.08117	0.0374187	0.241998	false
IGFBP3	6045.05	1.79237	0.86392	2.0747	0.0380144	0.243189	false
U2AF1	4739.91	-0.602834	0.29143	-2.06853	0.0385898	0.243189	false
NFKBIA	6271.49	-0.918378	0.444129	-2.06782	0.0386572	0.243189	false
STAT3	3958.25	-0.739392	0.360045	-2.05361	0.0400133	0.249452	false
INHBA	1943.35	1.71212	0.850372	2.01338	0.0440745	0.260848	false
MYCN	63.4834	-1.07273	0.532609	-2.0141	0.043999	0.260848	false
FOXO4	212.506	-1.35346	0.666463	-2.03081	0.0422747	0.260848	false
ETS2	4066.37	-1.19802	0.59232	-2.02259	0.0431157	0.260848	false
LAMC3	51.6383	0.684859	0.340199	2.01311	0.0441029	0.260848	false
ID1	5183.09	-1.1188	0.554181	-2.01885	0.0435033	0.260848	false
KDM6A	415.953	-0.891405	0.445398	-2.00137	0.0453527	0.265966	false
WEE1	1528.66	-1.15302	0.577145	-1.99781	0.0457377	0.26597	false
CSF2	65	2.07626	1.04412	1.98854	0.0467525	0.269606	false
TLK2	810.416	-0.562999	0.28547	-1.97218	0.0485888	0.27788	false
FANCG	177.07	-0.874682	0.446273	-1.95997	0.0499993	0.283603	false
IL3RA	52.1561	0.737214	0.37694	1.95579	0.0504903	0.284059	false
SPOP	66.7911	-0.551925	0.28273	-1.95213	0.0509227	0.284182	false
NASP	146.579	-0.951468	0.48905	-1.94555	0.0517094	0.284411	false
ID4	191.844	-1.24856	0.641962	-1.94491	0.0517859	0.284411	false
SMO	197.764	-1.24802	0.645373	-1.9338	0.0531373	0.285047	false
COL5A2	4014.09	1.24216	0.642195	1.93424	0.0530842	0.285047	false
IDH2	1762.65	-0.915989	0.472284	-1.93949	0.0524419	0.285047	false
PGF	313.644	0.917472	0.477948	1.91961	0.0549077	0.292278	false
WNT2	111.931	0.89778	0.473132	1.89752	0.0577588	0.296067	false
RNF43	90.3637	-0.991611	0.520714	-1.90433	0.0568673	0.296067	false
ZIC2	106.369	-1.6363	0.860613	-1.90132	0.0572601	0.296067	false
FAS	232.229	-1.05652	0.554418	-1.90563	0.0566979	0.296067	false
ACAD9	788.911	-0.89423	0.470865	-1.89912	0.0575482	0.296067	false
HDAC6	330.64	-0.571811	0.302172	-1.89234	0.058446	0.297079	false
TRIM39	161.049	-0.53018	0.280582	-1.88957	0.0588149	0.297079	false
HDAC11	159.467	-0.631556	0.337966	-1.8687	0.0616647	0.300594	false
FN1	6333.4	1.59263	0.854156	1.86457	0.0622421	0.300594	false
GNA11	938.228	-0.573735	0.306838	-1.86983	0.0615073	0.300594	false
BID	314.248	-0.706067	0.375773	-1.87897	0.0602485	0.300594	false
NUPR1	366.475	-1.33193	0.715183	-1.86237	0.0625515	0.300594	false
HDAC5	473.049	-0.727486	0.389553	-1.86749	0.0618333	0.300594	false
RUNX1	234.876	-0.619959	0.33142	-1.87061	0.0613985	0.300594	false
CREB3L1	305.161	1.38109	0.745654	1.85219	0.0639984	0.302471	false
POLE2	188.972	-0.6172	0.333546	-1.85042	0.0642532	0.302471	false
CNOT10	302.193	-0.43174	0.233075	-1.85236	0.0639735	0.302471	false
PIK3CB	285.179	-0.594399	0.323999	-1.83457	0.0665694	0.311257	false
MSH6	646.882	-0.677277	0.370099	-1.82999	0.0672513	0.312335	false
IL20RA	93.99	-1.74167	0.959228	-1.8157	0.0694172	0.318282	false
HMGA2	68.3212	1.28764	0.709259	1.81547	0.0694518	0.318282	false
MAPK12	60.0519	0.95595	0.532742	1.7944	0.0727501	0.331204	false
PDGFRB	1510.83	1.01944	0.571292	1.78445	0.0743512	0.336281	false
BMP5	30.2033	0.623253	0.349926	1.7811	0.0748963	0.336547	false
EGF	36.4184	-1.66055	0.934887	-1.7762	0.0756994	0.337961	false
FST	991.179	1.64521	0.92999	1.76906	0.0768838	0.338876	false
EFNA3	518.839	0.865969	0.489042	1.77075	0.0766027	0.338876	false
TCF3	667.879	-0.569336	0.322721	-1.76418	0.0777022	0.340316	false
HDAC1	1692.42	-0.539217	0.30739	-1.75418	0.0794	0.343405	false
IDH1	494.617	-0.875026	0.498301	-1.75602	0.0790853	0.343405	false
TNF	110.679	-1.36518	0.78135	-1.7472	0.0806023	0.345507	false
EFNA1	654.247	-0.791817	0.453614	-1.74558	0.0808846	0.345507	false
BMP8A	87.1484	0.996818	0.574257	1.73584	0.0825919	0.350636	false
FOS	7233.35	-1.73716	1.00509	-1.72836	0.0839238	0.35374	false
PPP2R1A	2097.21	0.4262	0.247129	1.72461	0.0845983	0.35374	false
TTC31	297.866	-0.673238	0.390696	-1.72318	0.0848567	0.35374	false
HNF1A	29.6708	0.606296	0.353606	1.71461	0.0864172	0.355957	false
DUSP2	58.4166	-1.34053	0.781634	-1.71503	0.0863394	0.355957	false
SMC1A	978.33	-0.686972	0.40578	-1.69297	0.0904617	0.370411	false
NSD1	422.14	-0.840764	0.50535	-1.66373	0.0961669	0.391456	false
BMPR1B	181.122	1.2524	0.755187	1.65839	0.0972378	0.3935	false
HDAC10	294.253	-0.658068	0.398667	-1.65067	0.0988063	0.397523	false
COL24A1	43.0607	0.912253	0.555482	1.64227	0.100534	0.402134	false
WNT3	92.5271	-1.2728	0.781972	-1.62768	0.103592	0.405153	false
SRSF2	1584.94	-0.388226	0.23755	-1.6343	0.102197	0.405153	false
CACNA1E	30.9879	0.622118	0.382253	1.6275	0.10363	0.405153	false
FGF21	41.4811	0.462871	0.284318	1.628	0.103524	0.405153	false
CREB5	384.455	1.01311	0.624598	1.62203	0.104798	0.407416	false
DUSP5	1046.07	0.885251	0.549606	1.6107	0.107245	0.414602	false
MAPK8IP1	78.9165	0.619931	0.386541	1.60379	0.10876	0.415813	false
NOS3	57.2993	0.73308	0.456341	1.60643	0.108179	0.415813	false
COL5A1	6239.07	1.11899	0.704802	1.58766	0.112362	0.426774	false
CHUK	596.784	0.446135	0.281391	1.58547	0.112861	0.426774	false
MCM7	2876.58	-0.537493	0.341397	-1.57439	0.115397	0.433992	false
ETV7	113.509	-1.14889	0.733825	-1.56562	0.117438	0.43692	false
PDGFA	118.486	0.547183	0.349425	1.56595	0.11736	0.43692	false
MAPK9	518.172	-0.724661	0.466275	-1.55415	0.120149	0.441364	false
HOXA10	84.1776	-0.672885	0.433224	-1.55321	0.120374	0.441364	false
CHEK2	203.003	-0.486073	0.313093	-1.55249	0.120546	0.441364	false
DUSP8	31.9547	-0.601454	0.388448	-1.54835	0.121537	0.442651	false
RPS6KA5	446.379	-0.546563	0.354008	-1.54393	0.122605	0.444203	false
DDB2	736.863	-0.628971	0.409746	-1.53503	0.124777	0.449718	false
EZH2	457.827	-0.782749	0.512818	-1.52637	0.126918	0.450562	false
MLLT3	119.646	-1.03185	0.677258	-1.52357	0.127616	0.450562	false
SETD2	504.508	-0.407196	0.266932	-1.52547	0.127143	0.450562	false
CACNG4	88.674	1.52435	0.999787	1.52468	0.127339	0.450562	false
IL19	38.366	-1.20848	0.79741	-1.51551	0.129644	0.453363	false
IL7	26.3297	-0.894531	0.590368	-1.51521	0.129719	0.453363	false
CASP3	506.484	-0.641672	0.427198	-1.50205	0.133084	0.462786	false
ALKBH3	267.962	0.463535	0.311145	1.48977	0.136285	0.470801	false
DUSP6	1979.75	1.03594	0.697404	1.48543	0.13743	0.470801	false
MAD2L2	542.982	0.572474	0.384849	1.48753	0.136875	0.470801	false
CDK2	400.893	-0.518869	0.351177	-1.47751	0.139538	0.475666	false
SMAD2	1016.89	-0.674683	0.461095	-1.46322	0.143408	0.476142	false
ETV4	162.264	1.37407	0.952749	1.44222	0.149241	0.476142	false
NOTCH3	1774.35	-0.748146	0.517758	-1.44497	0.148465	0.476142	false
PPP2R2C	937.877	1.03493	0.708014	1.46174	0.143812	0.476142	false
PLCE1	47.6631	-1.28643	0.887649	-1.44925	0.147267	0.476142	false
FANCA	149.835	-0.834497	0.568257	-1.46852	0.141963	0.476142	false
PDGFRA	205.647	1.01003	0.68517	1.47413	0.140447	0.476142	false
MGMT	606.769	0.872156	0.600117	1.45331	0.146138	0.476142	false
SFN	44873.7	0.953997	0.661592	1.44197	0.149311	0.476142	false
GLI3	599.632	-0.722828	0.497026	-1.45431	0.145861	0.476142	false
STAT4	134.08	0.800312	0.553571	1.44573	0.148254	0.476142	false
MDM2	1948.09	-0.858222	0.585847	-1.46492	0.142942	0.476142	false
COL3A1	32807.4	1.23573	0.856259	1.44318	0.14897	0.476142	false
XRCC4	277.511	0.541677	0.370234	1.46307	0.143449	0.476142	false
LIG4	297.562	0.637093	0.445786	1.42915	0.152962	0.482841	false
KMT2C	966.934	-0.551611	0.386946	-1.42555	0.153998	0.482841	false
GADD45A	1339.7	0.626768	0.439886	1.42484	0.154202	0.482841	false
PTEN	1520.23	0.451771	0.316783	1.42612	0.153833	0.482841	false
NFKBIZ	1874.53	-0.980082	0.69514	-1.4099	0.158568	0.487684	false
EFNA5	78.6129	-0.944305	0.669525	-1.41041	0.158418	0.487684	false
IL1R1	370.034	0.665445	0.470281	1.41499	0.15707	0.487684	false
PRKACB	233.725	-0.954421	0.675387	-1.41315	0.157612	0.487684	false
FBXW7	305.037	-0.57645	0.410973	-1.40265	0.160722	0.489955	false
ITGA9	48.309	0.515178	0.367018	1.40369	0.160412	0.489955	false
LAMA3	4409.34	1.20454	0.878086	1.37177	0.170134	0.496731	false
ITGA7	46.7404	0.687539	0.503404	1.36578	0.172009	0.496731	false
PLCB1	69.9995	-0.742045	0.541288	-1.37089	0.17041	0.496731	false
FGF12	64.6469	-1.17271	0.850723	-1.37849	0.168053	0.496731	false
FGFR3	2016.83	-0.895963	0.652519	-1.37308	0.169726	0.496731	false
ERBB2	1277.62	-0.716065	0.519769	-1.37766	0.168308	0.496731	false
CALML5	120.382	-1.56276	1.12711	-1.38652	0.16559	0.496731	false
ITGA8	41.1426	0.618975	0.453188	1.36582	0.171995	0.496731	false
MAP3K14	386.702	-0.504413	0.366406	-1.37665	0.16862	0.496731	false
HES5	130.244	1.1392	0.834628	1.36493	0.172276	0.496731	false
TGFBR2	757.193	0.662581	0.479486	1.38186	0.167016	0.496731	false
DUSP4	99.1733	0.734434	0.533926	1.37553	0.168966	0.496731	false
COG7	469.128	-0.434056	0.317878	-1.36548	0.172102	0.496731	false
MAP3K13	175.257	-0.725498	0.534319	-1.3578	0.174527	0.501132	false
IL2RB	87.9679	-0.950605	0.706635	-1.34526	0.178542	0.510543	false
CNOT4	522.062	-0.381281	0.283933	-1.34285	0.179319	0.510654	false
FANCB	149.603	-0.626728	0.468609	-1.33742	0.181085	0.513568	false
POLR2J	150.45	-0.462323	0.346341	-1.33488	0.181916	0.513821	false
ID2	266.242	-0.845743	0.636037	-1.32971	0.183615	0.514418	false
STK11	313.503	-0.411254	0.30923	-1.32993	0.183541	0.514418	false
NGFR	400.215	-1.1512	0.869087	-1.32461	0.185302	0.517052	false
AKT2	1563.8	-0.441822	0.336192	-1.3142	0.18878	0.52288	false
IL11	160.63	1.3219	1.01302	1.30491	0.191924	0.52288	false
COMP	497.851	-1.69009	1.29446	-1.30564	0.191677	0.52288	false
MCM5	581.745	-0.452587	0.34618	-1.30737	0.191086	0.52288	false
ITGB3	71.1552	0.649278	0.496313	1.3082	0.190804	0.52288	false
NTRK2	1437.21	-2.02119	1.53957	-1.31283	0.189242	0.52288	false
COL4A6	338.103	1.34287	1.0387	1.29283	0.19607	0.525939	false
HDAC2	2226.38	-0.670547	0.51769	-1.29527	0.195228	0.525939	false
CD14	603.118	-0.78682	0.608626	-1.29278	0.196087	0.525939	false
IL8	5049.44	1.16853	0.900073	1.29827	0.194196	0.525939	false
WNT5A	1993.68	-0.848314	0.657644	-1.28993	0.197075	0.526548	false
POLR2D	705.617	0.348756	0.271382	1.28511	0.198753	0.52899	false
RXRG	26.6932	-1.06536	0.834663	-1.27639	0.201817	0.532127	false
MYD88	798.28	-0.689375	0.539272	-1.27834	0.201128	0.532127	false
CEBPE	31.4792	0.838913	0.657868	1.2752	0.202239	0.532127	false
DDIT3	750.917	-0.715124	0.566115	-1.26321	0.206512	0.541313	false
CAMK2B	34.0094	0.51068	0.405001	1.26094	0.207332	0.541411	false
IL11RA	46.2657	-0.412718	0.328443	-1.25659	0.208902	0.543459	false
RASGRP2	58.4692	0.795021	0.636007	1.25002	0.211292	0.547619	false
PCNA	659.897	-0.54355	0.43809	-1.24073	0.214706	0.55439	false
NF2	801.142	0.453632	0.367563	1.23416	0.217142	0.556528	false
MPO	30.6514	0.472188	0.382127	1.23568	0.216577	0.556528	false
IL6	174.237	1.09492	0.89237	1.22698	0.219829	0.55927	false
DNAJC14	154.088	-0.356656	0.29033	-1.22845	0.219277	0.55927	false
RAD50	271.229	-0.502854	0.411576	-1.22178	0.221792	0.560795	false
RFC4	840.281	-0.521391	0.426985	-1.2211	0.222049	0.560795	false
FGFR1	288.748	0.71695	0.589528	1.21614	0.22393	0.56349	false
FZD3	113.937	0.701311	0.579203	1.21082	0.225964	0.564502	false
SPRY4	158.425	0.45773	0.377906	1.21123	0.225808	0.564502	false
PLCB4	126.103	1.23655	1.02542	1.20589	0.22786	0.56719	false
HOXA9	422.541	-0.903341	0.756697	-1.19379	0.232558	0.573414	false
MLLT4	1002.87	-0.399659	0.335489	-1.19127	0.233546	0.573414	false
CBLC	168.32	0.775294	0.650989	1.19095	0.233675	0.573414	false
MSH2	517.935	-0.463701	0.388548	-1.19342	0.232705	0.573414	false
IL3	27.2925	0.365345	0.308089	1.18584	0.235685	0.576303	false
KAT2B	269.385	-0.489782	0.414778	-1.18083	0.237671	0.579115	false
GNAQ	848.344	0.427669	0.36413	1.1745	0.240197	0.583215	false
CDC14B	105.483	0.672872	0.57603	1.16812	0.242759	0.583295	false
DNMT1	925.505	-0.453505	0.386978	-1.17192	0.241231	0.583295	false
PLA2G4C	63.9789	-0.633154	0.541142	-1.17003	0.241988	0.583295	false
FLNA	4677.81	0.50636	0.434489	1.16541	0.243851	0.583893	false
CDC25C	160.113	-0.6064	0.522478	-1.16062	0.245796	0.584758	false
PLA2G4F	102.39	-0.996732	0.860524	-1.15829	0.246748	0.584758	false
PRPF38A	642.916	-0.31198	0.268918	-1.16013	0.245997	0.584758	false
VEGFA	4503.56	-0.754768	0.653368	-1.15519	0.248011	0.585746	false
BRCA1	366.403	-0.43358	0.378412	-1.14579	0.251882	0.58983	false
RBX1	3172.88	-0.333115	0.290985	-1.14479	0.252297	0.58983	false
LEFTY1	41.0335	0.323556	0.282438	1.14558	0.251968	0.58983	false
JAG2	1678.71	-0.690913	0.605073	-1.14187	0.253509	0.590667	false
ITGA2	1240.35	-0.669173	0.59003	-1.13413	0.256738	0.595261	false
FZD7	409.456	-1.05298	0.931033	-1.13099	0.258061	0.595261	false
COL1A2	10709.2	0.939994	0.830663	1.13162	0.257794	0.595261	false
RAF1	832.486	-0.329775	0.294309	-1.12051	0.262498	0.597529	false
SIN3A	494.787	-0.396261	0.353195	-1.12193	0.261891	0.597529	false
FZD10	196.581	-0.814452	0.724444	-1.12424	0.260909	0.597529	false
COL4A4	32.3033	0.638168	0.568405	1.12274	0.26155	0.597529	false
TGFB3	358.791	-0.864235	0.775314	-1.11469	0.264983	0.601208	false
CCR7	39.0778	0.899592	0.808538	1.11262	0.265873	0.601256	false
RB1	1398.7	-0.514934	0.465798	-1.10549	0.268948	0.605268	false
VHL	537.335	-0.296725	0.269645	-1.10043	0.271146	0.605268	false
HES1	652.402	-0.48231	0.43766	-1.10202	0.270453	0.605268	false
SMAD3	1006.68	-0.623129	0.564305	-1.10424	0.269488	0.605268	false
CYLD	1053.77	0.369974	0.337279	1.09694	0.272668	0.606709	false
NBN	1283.96	0.24113	0.220474	1.09369	0.274092	0.607922	false
MDC1	394.611	-0.334259	0.307249	-1.08791	0.276634	0.611601	false
EPO	39.7959	1.07846	0.996761	1.08197	0.279268	0.615357	false
ACVR1C	57.3143	-0.541263	0.501138	-1.08007	0.280112	0.615357	false
TFDP1	1094.83	-0.468635	0.439965	-1.06516	0.286801	0.620208	false
IL20RB	1795.02	-0.725097	0.680307	-1.06584	0.286497	0.620208	false
CACNG1	29.4497	0.368252	0.344721	1.06826	0.285404	0.620208	false
PTTG2	1333.34	-0.486795	0.456116	-1.06726	0.285854	0.620208	false
ZNF346	71.9892	-0.40099	0.374451	-1.07088	0.284225	0.620208	false
NTF3	41.0033	0.938728	0.883	1.06311	0.287731	0.62028	false
CD19	51.2093	1.02444	0.971102	1.05492	0.29146	0.626368	false
AKT1	2961.24	0.317663	0.303049	1.04822	0.294536	0.626661	false
PLA2G3	106.271	1.12097	1.06929	1.04833	0.294488	0.626661	false
WHSC1L1	942.766	-0.40628	0.388138	-1.04674	0.295219	0.626661	false
STAG2	1466.75	-0.389244	0.370108	-1.0517	0.292936	0.626661	false
AMER1	162.313	-0.490946	0.471215	-1.04187	0.297471	0.628039	false
LEF1	108.441	-0.606443	0.582326	-1.04141	0.297683	0.628039	false
TTK	747.337	-0.393008	0.379466	-1.03569	0.300348	0.631734	false
MEN1	876.68	-0.532142	0.515049	-1.03319	0.301516	0.632271	false
WNT2B	189.333	-0.644385	0.627522	-1.02687	0.304481	0.636558	false
BCL2A1	140.871	0.833796	0.819431	1.01753	0.308901	0.641921	false
UBE2T	471.404	-0.45016	0.441682	-1.0192	0.30811	0.641921	false
PLAU	4068.45	0.674656	0.667159	1.01124	0.311903	0.646219	false
DAXX	921.803	-0.256639	0.254928	-1.00671	0.314073	0.648772	false
KITLG	847.536	-0.595634	0.596339	-0.998817	0.317883	0.648895	false
CDKN2A	179.884	-0.752985	0.750638	-1.00313	0.3158	0.648895	false
PRKAR1B	114.154	0.536262	0.536072	1.00036	0.317139	0.648895	false
POS	587.827	0.27986	0.28003	0.999392	0.317605	0.648895	false
NEG	36.5719	0.348218	0.349379	0.996679	0.31892	0.649097	false
ATRX	851.324	-0.333842	0.338254	-0.986957	0.323664	0.649204	false
FGF13	75.4499	0.830294	0.840454	0.987912	0.323196	0.649204	false
CDKN2B	1710.01	0.962973	0.97257	0.990133	0.322109	0.649204	false
GRIA3	194.472	0.793372	0.802364	0.988793	0.322765	0.649204	false
USP39	291.008	-0.28448	0.287867	-0.988234	0.323038	0.649204	false
CDKN1B	183.243	-0.388283	0.395052	-0.982865	0.325674	0.649471	false
TMUB2	237.222	-0.282619	0.287062	-0.984522	0.324859	0.649471	false
FASLG	37.2684	-0.387243	0.396755	-0.976026	0.329052	0.654321	false
SIX1	33.4542	-0.462723	0.476537	-0.971011	0.331543	0.655683	false
ANGPT1	70.0919	0.627073	0.646247	0.97033	0.331882	0.655683	false
NOTCH2	1234.81	-0.412882	0.426121	-0.968932	0.332579	0.655683	false
PAX8	34.6969	0.493646	0.511474	0.965144	0.334473	0.657543	false
TNFRSF10B	266.054	-0.501877	0.524956	-0.956037	0.339054	0.66466	false
PIK3R2	555.368	-0.371843	0.392435	-0.947528	0.34337	0.670383	false
APH1B	50.6373	-0.367893	0.388701	-0.946467	0.34391	0.670383	false
IL1A	344.251	1.01112	1.0727	0.942595	0.345888	0.672344	false
EYA1	34.5138	0.70274	0.748359	0.939041	0.34771	0.673992	false
SMARCB1	1501.68	-0.264309	0.283308	-0.932939	0.350852	0.676294	false
DLL3	38.1969	0.546847	0.585855	0.933417	0.350605	0.676294	false
CSF3R	254.156	0.832936	0.901659	0.923781	0.3556	0.681649	false
BAD	788.774	-0.465072	0.503243	-0.924149	0.355409	0.681649	false
FLT1	320.114	-0.255607	0.277589	-0.920811	0.357149	0.682727	false
RPS27A	60169.5	0.302743	0.329694	0.918254	0.358486	0.683394	false
CDC7	310.399	-0.320744	0.351519	-0.912453	0.36153	0.685422	false
MAPK8	413.124	0.408504	0.447525	0.912809	0.361343	0.685422	false
MAP3K8	232.437	-0.485629	0.534283	-0.908937	0.363384	0.687053	false
NR4A1	182.611	-0.673023	0.742635	-0.906264	0.364796	0.687844	false
BRAF	300.154	-0.334096	0.370718	-0.901214	0.367474	0.691012	false
FUT8	227.382	0.449189	0.501467	0.895749	0.370387	0.694601	false
CDH1	4618.16	0.456647	0.511593	0.892597	0.372073	0.695877	false
JAG1	3902.08	0.606876	0.686251	0.884336	0.376515	0.700399	false
COL1A1	32924.8	0.783456	0.885308	0.884953	0.376182	0.700399	false
HMGA1	960.297	-0.461423	0.523094	-0.882103	0.377721	0.700759	false
RASGRP1	154.216	-0.62341	0.716657	-0.869886	0.384363	0.711174	false
CACNB3	101.187	-0.395791	0.459835	-0.860725	0.389389	0.713034	false
HSPA2	2085.45	-0.77385	0.897945	-0.861801	0.388797	0.713034	false
DKK4	36.3452	-0.467496	0.543257	-0.860544	0.389489	0.713034	false
NUBP1	153.883	-0.272675	0.315911	-0.863139	0.388061	0.713034	false
NCOR1	1550.38	-0.330912	0.392755	-0.842541	0.399485	0.724814	false
IRS1	341.348	0.509175	0.602234	0.845477	0.397845	0.724814	false
GAS1	499.223	0.619635	0.735066	0.842965	0.399248	0.724814	false
GRB2	2568.71	-0.247409	0.294039	-0.841418	0.400114	0.724814	false
CDK4	705.126	-0.305169	0.365701	-0.834475	0.404013	0.728065	false
CASP7	513.15	-0.337068	0.403144	-0.836098	0.4031	0.728065	false
COL2A1	78.3267	0.343224	0.422813	0.811762	0.416928	0.738311	false
MLH1	348.725	-0.19175	0.233818	-0.820084	0.412168	0.738311	false
GRIN2A	40.7011	0.380876	0.465677	0.817896	0.413416	0.738311	false
BMP4	110.288	-0.541116	0.666936	-0.811346	0.417167	0.738311	false
COL11A1	1608.02	1.06797	1.31022	0.815105	0.415012	0.738311	false
MAP2K2	1575.89	-0.200352	0.246475	-0.812871	0.416292	0.738311	false
GHR	77.1867	0.597603	0.731964	0.816438	0.414249	0.738311	false
HSP90B1	3274.16	0.231218	0.286868	0.806009	0.420238	0.741848	false
ASXL1	995.911	0.218978	0.273187	0.801568	0.422803	0.744477	false
CCNA2	1146.11	-0.331206	0.415381	-0.797354	0.425246	0.746878	false
ITGB7	63.6758	-0.403686	0.511303	-0.789523	0.429806	0.750382	false
ALKBH2	85.3253	0.341837	0.435659	0.784643	0.432663	0.750382	false
SPRY2	217.179	-0.573058	0.726883	-0.788377	0.430476	0.750382	false
TSC1	410.794	-0.331628	0.421821	-0.786181	0.431761	0.750382	false
SAP130	570.274	0.242595	0.308885	0.78539	0.432225	0.750382	false
HHIP	31.9153	0.356963	0.458613	0.778354	0.436361	0.751148	false
GADD45B	677.805	-0.452077	0.579732	-0.779802	0.435507	0.751148	false
LTBP1	1647.39	0.485774	0.622256	0.780666	0.434999	0.751148	false
LAT	166.864	-0.509964	0.683296	-0.74633	0.455468	0.774149	false
PPP3R1	2708.48	-0.194026	0.260828	-0.743887	0.456945	0.774149	false
H2AFX	407.708	0.365982	0.492652	0.742881	0.457554	0.774149	false
WNT7A	75.0534	0.549973	0.738711	0.744503	0.456572	0.774149	false
SOCS3	1385.77	-0.54581	0.724993	-0.752849	0.451541	0.774149	false
TSPAN7	461.984	-0.801146	1.06985	-0.748839	0.453954	0.774149	false
NFKB1	459.329	-0.2395	0.319784	-0.748943	0.453892	0.774149	false
TSLP	83.9034	-0.674038	0.918778	-0.733624	0.463178	0.779851	false
LAMA5	556.148	-0.453294	0.616902	-0.734792	0.462466	0.779851	false
DHX16	111.884	-0.165348	0.227307	-0.727421	0.466968	0.7842	false
NOL7	1574.21	0.249301	0.343535	0.725693	0.468027	0.7842	false
PRKDC	3182.26	0.27453	0.380878	0.720784	0.471043	0.786654	false
FCF1	1348.77	-0.245178	0.340709	-0.71961	0.471765	0.786654	false
POS	22110.5	0.21055	0.294777	0.714268	0.475061	0.790246	false
LAMB3	5800.28	0.501961	0.706458	0.710532	0.477374	0.790294	false
POS	2509.62	0.197011	0.276906	0.711472	0.476792	0.790294	false
PPARG	51.6383	-0.555227	0.798611	-0.695241	0.486904	0.790322	false
BMP2	439.676	0.431662	0.621763	0.694255	0.487523	0.790322	false
SFRP2	2446.97	0.676616	0.9655	0.700793	0.483432	0.790322	false
PRKACG	31.2147	0.23795	0.343586	0.692547	0.488594	0.790322	false
FGF16	31.882	0.297873	0.425406	0.700208	0.483798	0.790322	false
DKK2	47.4821	-0.271832	0.390915	-0.695372	0.486822	0.790322	false
IL1R2	393.757	0.713638	1.02897	0.693545	0.487967	0.790322	false
PDGFB	36.2202	0.283398	0.409472	0.692105	0.488871	0.790322	false
HDAC3	515.756	-0.238382	0.337957	-0.705361	0.480586	0.790322	false
SLC4A1AP	588.459	-0.218126	0.308288	-0.70754	0.479231	0.790322	false
POS	10327	0.194526	0.281766	0.690382	0.489954	0.790322	false
IKBKG	472.471	0.256856	0.379625	0.676603	0.498658	0.795484	false
DDIT4	1016.64	0.432675	0.643862	0.671999	0.501584	0.795484	false
IGF1	64.7615	0.41329	0.615602	0.67136	0.501991	0.795484	false
STMN1	3254.56	-0.286356	0.426889	-0.670796	0.50235	0.795484	false
FANCC	460.686	-0.282586	0.420097	-0.672669	0.501158	0.795484	false
SPRY1	149.416	0.335639	0.496678	0.675769	0.499187	0.795484	false
IL22RA1	230.255	0.440271	0.653266	0.673954	0.50034	0.795484	false
MTMR14	287.421	-0.181435	0.267982	-0.67704	0.498381	0.795484	false
OSM	86.6731	-0.452073	0.678607	-0.666177	0.505298	0.798325	false
TGFB2	219.06	0.556114	0.841295	0.661021	0.508599	0.801709	false
GNG4	111.334	-0.628113	0.980057	-0.640894	0.521591	0.811661	false
IL23A	43.4367	0.327165	0.507584	0.644553	0.519217	0.811661	false
PRKAR2A	927.029	-0.171475	0.26856	-0.638499	0.523149	0.811661	false
PML	1509.65	-0.288647	0.449629	-0.641967	0.520895	0.811661	false
CDKN2D	186.434	0.305507	0.479607	0.636995	0.524128	0.811661	false
HOXA11	26.8759	0.430375	0.673907	0.638627	0.523066	0.811661	false
FGF4	36.4614	0.246309	0.381512	0.645612	0.518531	0.811661	false
PHF6	624.078	-0.235132	0.369276	-0.636738	0.524295	0.811661	false
ZNF143	370.12	-0.120259	0.192457	-0.62486	0.532063	0.821847	false
RELA	704.232	-0.264936	0.427334	-0.619973	0.535275	0.824968	false
MYC	2107.8	0.34597	0.560702	0.617031	0.537214	0.825649	false
CD40	190.405	-0.361352	0.586913	-0.615683	0.538104	0.825649	false
BAP1	649.415	-0.197074	0.322948	-0.610235	0.541706	0.825684	false
ERCC3	194.067	0.151214	0.246426	0.613629	0.53946	0.825684	false
GPATCH3	62.8987	-0.209767	0.343476	-0.610718	0.541386	0.825684	false
LEP	28.9708	-0.412408	0.68952	-0.598108	0.549768	0.827754	false
CACNA2D2	36.3724	-0.238561	0.400499	-0.595661	0.551402	0.827754	false
SOCS1	278.439	0.353312	0.584777	0.604182	0.545723	0.827754	false
DUSP10	569.451	-0.414844	0.687319	-0.603569	0.54613	0.827754	false
EPOR	69.4521	0.214034	0.359925	0.594663	0.552069	0.827754	false
CDKN1A	2187.55	-0.28767	0.48444	-0.593819	0.552633	0.827754	false
SF3B1	2152.11	-0.145404	0.243084	-0.598162	0.549732	0.827754	false
PPP2R2B	54.436	-0.350889	0.589072	-0.595663	0.551401	0.827754	false
MTOR	428.154	0.171045	0.289745	0.59033	0.55497	0.829458	false
SKP2	966.775	0.276537	0.470831	0.587339	0.556976	0.830663	false
JUN	1306.94	-0.315837	0.543567	-0.581046	0.561209	0.835176	false
JAK1	1320.19	0.207219	0.373254	0.555168	0.578779	0.837594	false
BMP7	454.286	-0.49075	0.871816	-0.562906	0.573499	0.837594	false
DTX4	101.423	-0.339303	0.594165	-0.57106	0.567959	0.837594	false
WNT5B	89.7689	0.477029	0.859758	0.554841	0.579004	0.837594	false
E2F1	131.7	0.236977	0.422682	0.560651	0.575035	0.837594	false
NR4A3	150.523	0.4615	0.818594	0.563772	0.57291	0.837594	false
CTNNB1	6058.51	-0.226855	0.409645	-0.553783	0.579727	0.837594	false
FGF2	128.625	0.475417	0.864002	0.55025	0.582148	0.837594	false
RIN1	368.829	-0.388656	0.704764	-0.551469	0.581312	0.837594	false
PRDM1	1298.16	-0.257451	0.461328	-0.558065	0.5768	0.837594	false
GATA1	31.0862	0.211729	0.377295	0.561176	0.574678	0.837594	false
AKT3	494.007	0.346879	0.614992	0.564038	0.572728	0.837594	false
FGFR2	188.874	-0.311376	0.558967	-0.557056	0.577489	0.837594	false
FUBP1	1860.4	-0.175355	0.313512	-0.559325	0.57594	0.837594	false
ZC3H14	606.402	-0.116082	0.206521	-0.562082	0.57406	0.837594	false
CC2D1B	26.7565	0.230951	0.419778	0.550174	0.5822	0.837594	false
EFNA2	29.6046	0.218701	0.405473	0.539372	0.58963	0.84477	false
MCM4	1770.74	-0.173068	0.320628	-0.539777	0.589351	0.84477	false
HRAS	345.931	0.220189	0.410315	0.536635	0.59152	0.845727	false
ERCC6	417.849	0.218492	0.417805	0.522953	0.601007	0.851575	false
CDC14A	119.281	-0.218646	0.418346	-0.522644	0.601222	0.851575	false
PROM1	32.8656	-0.173949	0.33332	-0.521866	0.601763	0.851575	false
FANCF	130.421	0.271452	0.516081	0.525986	0.598898	0.851575	false
RBM45	192.404	0.120868	0.231203	0.522777	0.60113	0.851575	false
BIRC3	78.2854	0.407878	0.78787	0.517697	0.60467	0.852202	false
WHSC1	798.58	-0.188763	0.363606	-0.519141	0.603663	0.852202	false
SMARCA4	1102.16	0.160841	0.313385	0.513238	0.607785	0.853145	false
FGF1	97.3449	0.38087	0.742133	0.51321	0.607805	0.853145	false
MAP2K4	400.829	0.204005	0.401829	0.507692	0.61167	0.853378	false
HGF	82.6529	0.225326	0.441027	0.510912	0.609413	0.853378	false
MMP7	598.984	-0.4852	0.952956	-0.509152	0.610645	0.853378	false
POS	98.3981	0.144401	0.288097	0.501223	0.616214	0.857988	false
HELLS	703.404	-0.203942	0.411472	-0.49564	0.620148	0.859518	false
FZD2	42.5526	0.172296	0.348511	0.494378	0.621039	0.859518	false
COL27A1	529.65	0.33977	0.684092	0.496673	0.61942	0.859518	false
ZBTB16	82.4796	-0.641521	1.31364	-0.488354	0.625299	0.863291	false
IGF1R	2836.78	-0.283139	0.583506	-0.485237	0.627508	0.863291	false
ZNF384	646.022	0.179537	0.36897	0.486589	0.62655	0.863291	false
TLR4	187.578	0.284869	0.590744	0.48222	0.62965	0.864519	false
B2M	90657.2	-0.281142	0.58838	-0.477824	0.632775	0.866433	false
VPS33B	115.26	0.166266	0.348757	0.47674	0.633548	0.866433	false
PRLR	55.0742	-0.401181	0.845719	-0.474367	0.635238	0.867031	false
CDKN1C	190.76	-0.309234	0.661206	-0.467681	0.640013	0.871828	false
CDC6	609.791	0.202856	0.439745	0.461303	0.644581	0.876327	false
MET	1194.7	0.282912	0.622609	0.454397	0.649543	0.881341	false
ITGA3	4072.72	-0.284376	0.641708	-0.443155	0.657653	0.88886	false
AMMECR1L	530.626	0.129364	0.290823	0.444821	0.656449	0.88886	false
GADD45G	81.7181	0.206324	0.468339	0.440544	0.659543	0.888888	false
PTCH1	114.081	-0.357932	0.817559	-0.437805	0.661528	0.888888	false
JAK3	135.222	0.298954	0.682831	0.437815	0.66152	0.888888	false
FGF11	465.281	-0.338839	0.783019	-0.432734	0.665208	0.890488	false
CACNA1G	31.2289	-0.255871	0.59388	-0.430847	0.666579	0.890488	false
SMC3	1272.94	0.125164	0.289504	0.432339	0.665495	0.890488	false
PPP3CA	487.809	-0.163235	0.383803	-0.42531	0.670611	0.892428	false
FEN1	586.72	-0.170313	0.399279	-0.426552	0.669706	0.892428	false
BCL2	80.5122	0.27147	0.641373	0.423264	0.672103	0.892697	false
RASAL1	137.007	-0.381481	0.92725	-0.411411	0.680771	0.899034	false
SFRP1	628.117	0.506082	1.22036	0.4147	0.678361	0.899034	false
POLB	359.64	-0.182339	0.441397	-0.413096	0.679537	0.899034	false
PAX5	37.1781	0.277106	0.679407	0.407865	0.683373	0.90075	false
MMP9	1587.42	-0.215015	0.553952	-0.388148	0.697907	0.917897	false
IL10	33.4667	-0.18268	0.474658	-0.384866	0.700337	0.917897	false
BAIAP3	71.0864	-0.32752	0.85107	-0.384833	0.700361	0.917897	false
PRKACA	1776.39	-0.127106	0.337248	-0.376892	0.706254	0.920432	false
RAC3	275.633	0.298354	0.808408	0.369064	0.71208	0.920432	false
HDAC4	200.334	0.179598	0.487761	0.368209	0.712717	0.920432	false
FANCE	330.952	0.184817	0.502334	0.367916	0.712936	0.920432	false
GNAS	1911.51	0.154868	0.415204	0.372993	0.709153	0.920432	false
BCL2L1	1101.84	-0.129672	0.348161	-0.372448	0.709559	0.920432	false
KDM5C	1075.43	-0.145938	0.387579	-0.376536	0.706518	0.920432	false
POS	69.8304	-0.121519	0.32067	-0.378954	0.704722	0.920432	false
POLD4	1056.3	0.168021	0.47092	0.356794	0.721246	0.923903	false
IL2RA	98.3363	0.211382	0.613138	0.344754	0.730279	0.923903	false
WNT7B	188.574	-0.192278	0.565473	-0.34003	0.733834	0.923903	false
SHC1	3631.05	-0.165011	0.483344	-0.341395	0.732806	0.923903	false
MLF1	634.881	-0.253472	0.734316	-0.345181	0.729959	0.923903	false
PPP2CB	2099.52	0.161574	0.475484	0.33981	0.733999	0.923903	false
MNAT1	443.023	-0.132209	0.373252	-0.354207	0.723184	0.923903	false
PTPN11	1400.09	0.0867428	0.245347	0.353551	0.723675	0.923903	false
HIST1H3G	3079.08	-0.189916	0.544476	-0.348805	0.727236	0.923903	false
RPS6KA6	30.8032	-0.306507	0.86975	-0.352408	0.724532	0.923903	false
TNFAIP3	2225.43	0.206856	0.609492	0.33939	0.734316	0.923903	false
MUTYH	71.7925	0.11851	0.328668	0.360578	0.718415	0.923903	false
CAPN2	5849.21	-0.168233	0.489476	-0.3437	0.731072	0.923903	false
SF3A3	466.913	-0.0980678	0.278122	-0.352606	0.724383	0.923903	false
CREBBP	36.7909	0.104989	0.312268	0.336213	0.73671	0.92434	false
CLCF1	62.9567	0.209267	0.627273	0.333614	0.738671	0.92434	false
NFE2L2	3090.06	0.211967	0.632874	0.334928	0.737679	0.92434	false
COL4A5	1246.43	-0.256419	0.779106	-0.329119	0.742066	0.924362	false
TIAM1	652.939	0.138808	0.425228	0.326432	0.744098	0.924362	false
CACNA1C	68.9271	0.155053	0.475939	0.325782	0.744589	0.924362	false
KLF4	2178.06	0.250437	0.75826	0.330279	0.741189	0.924362	false
PRKAR2B	99.7799	-0.224383	0.690931	-0.324754	0.745367	0.924362	false
PPARGC1A	80.4394	-0.209239	0.651872	-0.320982	0.748224	0.924591	false
INHBB	171.71	0.305277	0.949911	0.321375	0.747926	0.924591	false
BAMBI	96.3488	-0.258207	0.850277	-0.303674	0.761376	0.93583	false
LEPR	205.56	-0.179102	0.58318	-0.307113	0.758758	0.93583	false
MAPK1	1842.21	0.0876542	0.287137	0.30527	0.760161	0.93583	false
RRAS2	640.596	0.125333	0.419083	0.299065	0.764891	0.936822	false
CUL1	1077.31	0.114333	0.382007	0.299296	0.764714	0.936822	false
MAPK3	819.628	-0.128857	0.437441	-0.29457	0.768322	0.939362	false
LAMB4	42.4	-0.158638	0.554276	-0.286208	0.774719	0.94188	false
ATM	98.0718	0.11722	0.405245	0.289256	0.772385	0.94188	false
FOXL2	39.2777	0.125921	0.442194	0.284763	0.775826	0.94188	false
BDNF	65.9397	-0.212137	0.738401	-0.287293	0.773888	0.94188	false
FTSJ2	445.305	-0.0717978	0.2558	-0.28068	0.778956	0.944024	false
POLD1	48.2896	-0.115089	0.416969	-0.276012	0.782538	0.946707	false
ABL1	459.45	-0.0805829	0.296355	-0.271914	0.785688	0.947206	false
NODAL	32.4139	0.137846	0.506827	0.271978	0.785639	0.947206	false
PRKCA	137.038	-0.143784	0.53325	-0.269638	0.787439	0.947666	false
UBB	9644.89	-0.0863071	0.335005	-0.257629	0.796693	0.949574	false
TLR2	478.304	-0.193793	0.756026	-0.256331	0.797695	0.949574	false
LIFR	110.55	-0.213313	0.809022	-0.263667	0.792036	0.949574	false
SOCS2	197.034	0.126698	0.494384	0.256274	0.797739	0.949574	false
PDGFD	92.54	0.184842	0.729609	0.253344	0.800002	0.949574	false
PLA2G4E	497.93	-0.278267	1.09522	-0.254075	0.799438	0.949574	false
E2F5	168.631	0.156047	0.607043	0.257061	0.797131	0.949574	false
EIF2B4	662.618	-0.0939876	0.361502	-0.259992	0.79487	0.949574	false
IL6R	115.118	-0.122761	0.491312	-0.249865	0.802692	0.951135	false
PIK3CG	92.0725	0.175234	0.730819	0.239778	0.810502	0.954511	false
EIF4EBP1	1523.42	0.154231	0.635174	0.242817	0.808147	0.954511	false
IRAK3	71.5856	-0.137762	0.576263	-0.239061	0.811058	0.954511	false
BAX	1018.16	0.0673359	0.279388	0.241012	0.809546	0.954511	false
RUNX1T1	146.708	0.142082	0.624464	0.227526	0.820015	0.957005	false
TRAF7	1985.88	0.0867912	0.377786	0.229736	0.818297	0.957005	false
CARD11	70.9798	-0.160173	0.709834	-0.225648	0.821475	0.957005	false
RAD21	5373.1	0.0768256	0.339627	0.226206	0.821041	0.957005	false
GPC4	214.063	0.246586	1.06605	0.231309	0.817075	0.957005	false
SIRT4	35.5345	-0.0896793	0.390502	-0.229651	0.818363	0.957005	false
PLA2G4A	158.079	-0.224744	1.00849	-0.222852	0.823651	0.957235	false
WNT10A	305.453	0.193994	0.87448	0.221839	0.824439	0.957235	false
TNFRSF10C	95.2412	0.217905	1.05406	0.20673	0.836221	0.957358	false
NRAS	322.14	0.0741171	0.364258	0.203474	0.838764	0.957358	false
MFNG	80.4058	0.120519	0.600091	0.200835	0.840828	0.957358	false
CCND2	439.009	-0.181806	0.907094	-0.200427	0.841147	0.957358	false
RAD52	182.861	-0.103304	0.50411	-0.204924	0.837631	0.957358	false
CHEK1	325.029	0.0940074	0.445354	0.211085	0.832821	0.957358	false
MAP3K12	121.959	-0.107557	0.495077	-0.217253	0.828012	0.957358	false
TCF7L1	234.606	-0.138319	0.65923	-0.20982	0.833809	0.957358	false
WIF1	150.173	0.28067	1.36778	0.2052	0.837416	0.957358	false
CNTFR	61.135	0.206378	0.969227	0.212931	0.831381	0.957358	false
NFATC1	87.8877	0.0999162	0.477397	0.209294	0.834219	0.957358	false
CCNB1	2254.07	-0.0916946	0.432301	-0.212108	0.832022	0.957358	false
ETV1	116.856	-0.130638	0.669579	-0.195105	0.845311	0.958501	false
AR	72.1515	-0.124951	0.65214	-0.191602	0.848054	0.958501	false
SFRP4	262.303	-0.25294	1.32919	-0.190297	0.849076	0.958501	false
PLA2G2A	53.8479	-0.215694	1.12877	-0.191088	0.848457	0.958501	false
SHC4	32.0174	0.122737	0.626303	0.195971	0.844633	0.958501	false
HIST1H3H	6588.81	-0.0828017	0.442942	-0.186936	0.851711	0.959909	false
CACNB4	27.6426	0.0919917	0.515324	0.178512	0.858321	0.962852	false
TSHR	51.9998	-0.0865742	0.488759	-0.177131	0.859406	0.962852	false
IL1B	271.147	-0.146403	0.87245	-0.167807	0.866735	0.962852	false
FGF22	31.4259	0.0752777	0.433714	0.173565	0.862207	0.962852	false
PPP3CC	220.678	-0.0504555	0.292546	-0.17247	0.863068	0.962852	false
NKD1	93.6361	0.0886993	0.524387	0.169148	0.86568	0.962852	false
IL23R	33.9961	0.0880119	0.52492	0.167667	0.866845	0.962852	false
RAC2	367.763	0.121293	0.676964	0.179172	0.857803	0.962852	false
CDC25B	936.178	-0.103838	0.60198	-0.172495	0.863049	0.962852	false
RHOA	886.337	0.0710447	0.44187	0.160782	0.872265	0.966723	false
ZKSCAN5	73.53	-0.0517045	0.323779	-0.159691	0.873125	0.966723	false
GNG12	4452.96	-0.0557686	0.399699	-0.139527	0.889034	0.975856	false
FLT3	28.6389	-0.0962939	0.682085	-0.141176	0.887731	0.975856	false
TNFRSF10A	182.522	0.0629292	0.432927	0.145357	0.884429	0.975856	false
FGF20	34.8805	0.051074	0.360625	0.141626	0.887375	0.975856	false
FGFR4	29.5877	-0.071858	0.518775	-0.138515	0.889834	0.975856	false
EDC3	948.195	-0.053905	0.388056	-0.13891	0.889521	0.975856	false
RASA4	212.863	0.069018	0.54136	0.12749	0.898553	0.976649	false
GZMB	184.567	-0.121126	0.93033	-0.130196	0.896411	0.976649	false
PIK3R5	137.793	0.0746261	0.576211	0.129512	0.896953	0.976649	false
LFNG	219.302	0.0696946	0.549239	0.126893	0.899025	0.976649	false
NUMBL	210.582	0.0671537	0.515433	0.130286	0.89634	0.976649	false
PIM1	1988.15	-0.071618	0.547385	-0.130837	0.895905	0.976649	false
CCNE1	237.069	0.0654608	0.5374	0.12181	0.903049	0.976808	false
MAP2K1	711.555	-0.0572834	0.479048	-0.119577	0.904818	0.976808	false
C19orf40	156.551	-0.0558278	0.457078	-0.122141	0.902788	0.976808	false
MRPS5	1153.35	0.0364379	0.302594	0.120419	0.904152	0.976808	false
TNN	29.9458	0.0470162	0.412883	0.113873	0.909338	0.978736	false
THEM4	226.197	-0.0370073	0.330511	-0.11197	0.910847	0.978736	false
AXIN2	150.918	-0.0629495	0.554072	-0.113612	0.909545	0.978736	false
PRKCB	101.68	-0.0795164	0.728394	-0.109167	0.91307	0.979604	false
SOX9	1222.58	-0.073571	0.701222	-0.104918	0.916441	0.980181	false
ARNT2	54.8666	0.0629926	0.593693	0.106103	0.915501	0.980181	false
XPA	434.463	0.0532528	0.519782	0.102452	0.918398	0.980758	false
PKMYT1	360.912	0.0441461	0.465778	0.0947793	0.92449	0.98556	false
IL1RAP	853.873	0.0385192	0.413288	0.093202	0.925743	0.98556	false
FOSL1	648.15	0.0696825	0.820062	0.0849723	0.932283	0.985919	false
RAC1	2647.97	0.0310748	0.378857	0.0820224	0.934629	0.985919	false
CEBPA	434.144	-0.052536	0.608771	-0.0862984	0.931229	0.985919	false
MMP3	746.962	-0.0808343	0.9252	-0.0873695	0.930378	0.985919	false
PPP3CB	302.814	0.0335894	0.395323	0.0849669	0.932288	0.985919	false
IL12RB2	170.769	0.0621357	0.748015	0.0830675	0.933798	0.985919	false
SETBP1	801.703	0.0449904	0.58785	0.0765338	0.938994	0.986406	false
FZD8	58.8371	0.0308368	0.405395	0.0760661	0.939367	0.986406	false
AGK	246.157	-0.0291676	0.371252	-0.0785654	0.937378	0.986406	false
PDGFC	322.423	0.0335218	0.454872	0.0736952	0.941253	0.986889	false
RAD51	104.305	-0.0319089	0.454688	-0.0701777	0.944052	0.988254	false
DLL1	334.106	0.0402883	0.619206	0.0650644	0.948123	0.988254	false
MAPK10	94.8843	-0.0644682	0.979708	-0.0658035	0.947534	0.988254	false
CASP10	32.6808	-0.0209342	0.341524	-0.0612963	0.951123	0.988254	false
ITGB4	6812.95	-0.0332583	0.541658	-0.0614009	0.95104	0.988254	false
CBL	292.632	0.0242262	0.394257	0.0614476	0.951003	0.988254	false
TNC	473.209	-0.0308813	0.72332	-0.0426938	0.965946	0.988891	false
HHEX	158.156	-0.0369433	0.65771	-0.0561696	0.955207	0.988891	false
KRAS	1242.8	0.0334507	0.689722	0.0484987	0.961319	0.988891	false
CSF1R	30.5323	-0.0222474	0.401389	-0.055426	0.955799	0.988891	false
DLL4	86.2088	-0.0183496	0.395384	-0.0464095	0.962984	0.988891	false
GATA2	66.5452	0.0185216	0.38199	0.0484873	0.961328	0.988891	false
EGFR	4744.02	-0.0370415	0.786288	-0.0471094	0.962426	0.988891	false
NPM1	77.83	-0.0156166	0.366654	-0.0425921	0.966027	0.988891	false
IL22RA2	59.3876	-0.0263805	0.579288	-0.0455395	0.963677	0.988891	false
C10orf76	234.786	-0.0184219	0.407011	-0.0452615	0.963899	0.988891	false
IRAK2	219.012	-0.0159458	0.588947	-0.0270751	0.9784	0.995808	false
LIF	93.7957	-0.0151147	0.602239	-0.0250975	0.979977	0.995808	false
CCND3	313.541	-0.0104809	0.35162	-0.0298073	0.976221	0.995808	false
AXIN1	519.256	0.0108735	0.373779	0.0290908	0.976792	0.995808	false
NEG	25.6266	-0.0107892	0.429923	-0.0250957	0.979979	0.995808	false
TGFB1	2767.93	-0.00758857	0.390005	-0.0194576	0.984476	0.99711	false
GLI1	94.0485	0.013627	0.932175	0.0146185	0.988337	0.99711	false
CDC25A	117.865	0.00915551	0.534504	0.017129	0.986334	0.99711	false
TNFRSF10D	168.062	-0.0111748	0.633298	-0.0176454	0.985922	0.99711	false
EPHA2	789.612	-0.00809024	0.63943	-0.0126523	0.989905	0.99711	false
DDX50	700.645	-0.00344978	0.250151	-0.0137908	0.988997	0.99711	false
STAT1	1272.45	0.00719857	0.806674	0.00892377	0.99288	0.997985	false
WNT4	355.101	-0.0046195	1.11289	-0.0041509	0.996688	0.997985	false
ENDOG	385.075	-0.00381435	0.496716	-0.00767915	0.993873	0.997985	false
SYK	935.248	0.00358416	0.631793	0.005673	0.995474	0.997985	false
KIT	56.5239	-0.00127788	0.50595	-0.0025257	0.997985	0.997985	false
PLA2G10	19.2788	-0.614758	0.667246	-0.921336	0.356875	NA	false
IFNG	19.1791	-0.306523	0.429168	-0.714226	0.475087	NA	false
CASP12	19.7459	0.528179	0.324572	1.62731	0.103672	NA	false
IL13	11.8064	0.647846	0.365768	1.7712	0.0765282	NA	false
PRL	14.9232	0.566238	0.379687	1.49133	0.135875	NA	false
PAX3	15.0978	-0.568011	0.594208	-0.955913	0.339116	NA	false
PRKCG	11.832	0.578936	0.491715	1.17738	0.239044	NA	false
FZD9	22.1364	0.359772	0.459886	0.782307	0.434034	NA	false
MAPT	22.3763	0.285705	0.514364	0.555452	0.578585	NA	false
FIGF	13.9061	-0.438174	0.376678	-1.16326	0.244725	NA	false
CACNA1D	20.6498	-0.177681	0.422577	-0.420469	0.674143	NA	false
SSX1	13.7459	0.251703	0.423239	0.594706	0.55204	NA	false
RASGRF1	17.4706	0.0583065	0.646103	0.0902434	0.928094	NA	false
GRIN1	11.88	-0.0505207	0.418247	-0.120792	0.903856	NA	false
SOST	21.0869	-0.303095	0.813387	-0.372634	0.709421	NA	false
CACNB2	20.1778	-0.19	0.577703	-0.328889	0.74224	NA	false
HPGD	15.2037	0.108624	0.350598	0.309824	0.756695	NA	false
CRLF2	20.6244	0.226324	0.538516	0.420275	0.674285	NA	false
RELN	19.2707	1.32808	0.59931	2.21601	0.0266907	NA	false
CCNO	14.6587	0.0710768	0.38834	0.183027	0.854777	NA	false
AMH	13.173	0.497833	0.364719	1.36498	0.17226	NA	false
CREB3L3	6.91206	0.0607209	0.431724	0.140647	0.888148	NA	false
LEFTY2	11.2592	0.0781202	0.773349	0.101015	0.919538	NA	false
IFNA2	11.2055	0.215116	0.378655	0.568105	0.569964	NA	false
CACNA2D4	12.5818	0.396352	0.348885	1.13606	0.255934	NA	false
PAK3	14.255	0.274762	0.370743	0.741111	0.458626	NA	false
PLA2G5	9.41187	-0.0459958	0.387426	-0.118721	0.905496	NA	false
TCL1B	8.32415	-0.908878	0.500675	-1.8153	0.0694773	NA	false
IL5RA	15.2567	0.310246	0.355356	0.873057	0.382632	NA	false
GRIN2B	9.02206	1.01249	0.390199	2.5948	0.00946448	NA	false
DTX1	24.6588	0.340874	0.535802	0.636194	0.52465	NA	false
WNT6	16.2612	-0.0260732	0.494833	-0.052691	0.957978	NA	false
GNG7	22.5605	-0.209098	0.521638	-0.400849	0.688531	NA	false
CACNG6	16.3076	-0.11873	0.349642	-0.339575	0.734177	NA	false
WNT10B	24.6717	0.315186	0.592092	0.532326	0.5945	NA	false
TLX1	11.594	0.282916	0.358238	0.789744	0.429677	NA	false
CSF3	13.3061	0.307999	0.369079	0.834508	0.403995	NA	false
IFNA17	19.3929	0.430969	0.313973	1.37263	0.169867	NA	false
IL12B	17.7125	0.0173018	0.403561	0.0428729	0.965803	NA	false
IBSP	21.4991	0.810827	0.501037	1.6183	0.105599	NA	false
SOX17	16.5972	0.587577	0.415968	1.41255	0.157787	NA	false
FGF8	13.5289	-0.0319015	0.474818	-0.0671868	0.946433	NA	false
ALK	22.4263	0.0679197	0.32882	0.206556	0.836357	NA	false
CHAD	17.7042	-0.511864	0.341247	-1.49998	0.133619	NA	false
GNGT1	23.9278	0.188099	0.492432	0.381978	0.702477	NA	false
FGF6	12.2762	-0.130997	0.388395	-0.337278	0.735908	NA	false
UTY	10.0732	0.200983	0.400857	0.501384	0.616101	NA	false
FGF17	8.9861	0.0910643	0.391242	0.232757	0.81595	NA	false
WNT16	19.6301	-0.14918	1.05081	-0.141967	0.887106	NA	false
IFNA7	5.21718	0.181545	0.459197	0.395353	0.692583	NA	false
GDF6	24.7887	-0.0303153	0.599414	-0.0505749	0.959664	NA	false
PITX2	25.4574	-0.687955	0.489691	-1.40488	0.160058	NA	false
PTPN5	11.3818	0.328802	0.397581	0.827007	0.408233	NA	false
LRP2	14.4419	0.723552	0.411382	1.75883	0.0786061	NA	false
NPM2	15.6335	-2.34679	1.16998	-2.00584	0.0448734	NA	false
FGF23	25.2492	0.207802	0.356753	0.582481	0.560243	NA	false
TNR	24.4671	0.431753	0.419679	1.02877	0.303588	NA	false
CXXC4	20.6181	0.314877	0.326057	0.965712	0.334188	NA	false
TPO	14.4755	-0.0973872	0.596546	-0.163252	0.87032	NA	false
COL11A2	20.2886	0.437668	0.376333	1.16298	0.244838	NA	false
BIRC7	18.9031	0.0304561	0.392296	0.0776355	0.938118	NA	false
FGF9	23.1913	-0.433168	0.472205	-0.917329	0.35897	NA	false
SGK2	20.1028	0.135713	0.338257	0.401212	0.688264	NA	false
MPL	15.399	0.935972	0.34781	2.69104	0.0071229	NA	false
GATA3	17.1891	0.125689	0.423525	0.296769	0.766643	NA	false
RPA3	17.7216	0.239566	0.342271	0.699931	0.48397	NA	false
IL13RA2	25.3556	-0.527101	0.907862	-0.580597	0.561512	NA	false
PLA1A	20.2097	0.163231	0.575318	0.283723	0.776622	NA	false
FGF18	20.4425	0.121254	0.366369	0.33096	0.740674	NA	false
ZBTB32	22.0093	1.33473	0.632743	2.10943	0.0349074	NA	false
FGF19	17.409	0.71432	0.532484	1.34149	0.179763	NA	false
PCK1	21.8424	0.637017	0.430183	1.4808	0.138659	NA	false
NOG	15.5852	0.41852	0.696265	0.601093	0.547778	NA	false
WT1	17.0259	0.149692	0.440832	0.339566	0.734184	NA	false
FGF3	15.2418	0.401416	0.358284	1.12039	0.26255	NA	false
PTCRA	14.0878	0.00357494	0.42423	0.00842688	0.993276	NA	false
COL4A3	19.6848	-0.320308	0.558868	-0.573137	0.566552	NA	false
PPP3R2	13.2857	-0.00199424	0.339799	-0.00586889	0.995317	NA	false
PAK7	13.1704	-0.0914717	0.615919	-0.148512	0.881938	NA	false
COL6A6	20.984	0.0523064	0.48935	0.10689	0.914876	NA	false
RASGRF2	19.95	0.203533	0.395149	0.515079	0.606498	NA	false
IL12A	21.8531	0.138633	0.537916	0.257722	0.796622	NA	false
CALML6	14.4875	-0.145797	0.448124	-0.325351	0.744916	NA	false
NTRK1	21.9631	-0.0691453	0.520778	-0.132773	0.894373	NA	false
CCNB3	14.5137	-0.193408	0.389365	-0.496727	0.619381	NA	false
FGF5	12.0494	-0.897299	1.3461	-0.666594	0.505032	NA	false
NEG	17.4735	0.199932	0.372335	0.536969	0.591289	NA	false
NEG	11.0337	-0.378479	0.419746	-0.901686	0.367224	NA	false
NEG	15.8184	0.178662	0.338543	0.52774	0.59768	NA	false
NEG	17.6183	0.235819	0.375886	0.62737	0.530417	NA	false
NEG	23.9419	0.116612	0.371101	0.314232	0.753345	NA	false
NEG	15.5204	0.240415	0.372236	0.645868	0.518365	NA	false

## Sheet: INTERSECTIONS
comparison	total	geneSymbol
OTHER vs TP53 AND TP53 vs HPV	2	SMC1B CDC7
OTHER vs HPV AND TP53 vs HPV	20	IL7R PIK3R1 CDKN2C TNFSF10 CCNA1 BNIP3 PTPRR MCM2 CDK6 FGF7 PBX1 THBS1 NGF DKK1 CCND1 FGF10 CACNA2D3 PRMT8 PIK3R3 HSPA1A
OTHER vs HPV AND OTHER vs TP53	1	DNMT3A
TP53 vs HPV	76	RFC3 PCNA CREB3L1 MAPK12 TLR4 LAMA3 COL24A1 WIF1 HIST1H3B CCND2 FOS COL5A1 BMP6 NTF3 EPO MCM5 SHC2 NOTCH1 COL1A2 PDGFRA ETV7 COL3A1 AKT3 PLCB4 IL1R1 PTTG2 PGF FANCC PLAU GPC4 COL1A1 RAC2 MCM4 FZD3 TNFRSF10C DUSP5 PDGFRB ID1 EFNA3 BRIP1 MMP7 NOS3 ID2 FANCA LAMA1 STMN1 CDKN2A FGF13 BMP8A CCR7 WNT11 HMGA2 WEE1 THBS4 IRS1 CDK2 FN1 DUSP4 GRIA3 BRCA2 RFC4 COL5A2 RASGRP2 EZH2 JAK3 SHC3 CDC25C CCNE2 POLE…
OTHER vs TP53	1	ITGB8
OTHER vs HPV	22	ARID2 MAP3K5 HSPB1 MAML2 SPP1 H3F3A PBX3 TMPRSS2 FANCL APC CACNA2D1 PLAT IKBKB SP1 CACNA1H VEGFC PIK3CA IL15 SUV39H2 MECOM MYB MAP2K6
